# Supplementary material for: A multiplexed, single-cell sequencing screen identifies compounds that increase neurogenic reprogramming of murine Muller glia
Source: eLife. 2024 Dec 12;12:RP92091. doi: 10.7554/eLife.92091 (PMC11637464; doi:10.7554/eLife.92091)
Supplement: Figure 1—source data 1. [file elife-92091-fig1-data1.xlsx]

## Sheet: Sheet1
GeneID	Cluster	q_value	estimate	id
Fcna	2	2.47e-93	-21.49	ENSMUSG00000026938
Fitm1	2	2.47e-93	-21.49	ENSMUSG00000022215
Gm29099	2	2.47e-93	-21.49	ENSMUSG00000101265
Gm41495	2	2.47e-93	-21.49	ENSMUSG00000116608
Gm49035	2	2.47e-93	-21.49	ENSMUSG00000115390
Gm50270	1	2.47e-93	-21.49	ENSMUSG00000117670
Gm34113	2	1.25e-74	-21.3953	ENSMUSG00000111524
Gm46419	2	1.25e-74	-21.3953	ENSMUSG00000114903
9130017K11Rik	2	2e-73	-20.2377	ENSMUSG00000055134
Gm36001	2	2e-73	-20.2377	ENSMUSG00000116753
Il22Ra2	2	2e-73	-20.2377	ENSMUSG00000039760
Nctc1	2	2e-73	-20.2377	ENSMUSG00000087090
Pla2G12B	3	2e-73	-20.2377	ENSMUSG00000009646
Ptx4	2	2.14e-73	-20.2377	ENSMUSG00000044172
4930553P18Rik	1	4.75e-52	-13.8761	ENSMUSG00000106791
Olfr1419	3	1.72e-63	-12.2132	ENSMUSG00000067545
Prelp	3	1.73e-57	-0.29062	ENSMUSG00000041577
Vcam1	3	1.74e-51	-0.264505	ENSMUSG00000027962
Igfbp5	2	1.27e-62	-0.263611	ENSMUSG00000026185
Ogn	3	1.15e-49	-0.258005	ENSMUSG00000021390
Bmp2	2	9.46e-63	-0.25745	ENSMUSG00000027358
H19	2	3.88e-74	-0.255774	ENSMUSG00000000031
Morrbid	2	2.74e-65	-0.246698	ENSMUSG00000074813
Pdpn	2	2.68e-209	-0.246619	ENSMUSG00000028583
Bace2	3	1.07e-54	-0.236158	ENSMUSG00000040605
Igfbp2	3	3.43e-82	-0.222892	ENSMUSG00000039323
Col8A1	3	7.95e-52	-0.22073	ENSMUSG00000068196
Fbn1	3	3.64e-57	-0.217115	ENSMUSG00000027204
S100A11	3	3.15e-52	-0.216127	ENSMUSG00000027907
Pmepa1	3	9.36e-65	-0.213343	ENSMUSG00000038400
Tmem176A	3	7.07e-74	-0.213279	ENSMUSG00000023367
Dclk3	2	3.83e-54	-0.21161	ENSMUSG00000032500
Sdc4	3	1.47e-84	-0.21089	ENSMUSG00000017009
Ccn1	3	2.4e-108	-0.204916	ENSMUSG00000028195
Crip1	2	2.92e-62	-0.204532	ENSMUSG00000006360
Ndrg1	3	3.75e-58	-0.203378	ENSMUSG00000005125
Cebpd	3	1.34e-61	-0.200298	ENSMUSG00000071637
Nebl	2	1.05e-58	-0.19899	ENSMUSG00000053702
Gna14	3	1.01e-61	-0.198223	ENSMUSG00000024697
Nos1Ap	3	2.21e-64	-0.196589	ENSMUSG00000038473
Mme	3	1.09e-59	-0.195599	ENSMUSG00000027820
Ass1	3	6.04e-225	-0.195162	ENSMUSG00000076441
Adamts5	3	2.77e-52	-0.194769	ENSMUSG00000022894
Adamtsl1	3	1.13e-124	-0.19453	ENSMUSG00000066113
Ahnak	3	1.02e-119	-0.191153	ENSMUSG00000069833
Clu	3	4.87e-59	-0.189714	ENSMUSG00000022037
Grm8	3	3.55e-79	-0.188298	ENSMUSG00000024211
Cp	3	5.23e-277	-0.183546	ENSMUSG00000003617
Samd4	3	1.4e-56	-0.181019	ENSMUSG00000021838
Col4A1	3	2.8e-82	-0.178749	ENSMUSG00000031502
Lrp4	2	1.89e-62	-0.178665	ENSMUSG00000027253
Runx1	3	1.19e-114	-0.17742	ENSMUSG00000022952
Sulf1	3	5.14e-85	-0.177163	ENSMUSG00000016918
Rgs6	3	2.98e-79	-0.171247	ENSMUSG00000021219
Efemp1	3	7.13e-47	-0.170441	ENSMUSG00000020467
St5	3	8.61e-66	-0.165286	ENSMUSG00000031024
Vgll3	3	4.97e-81	-0.164466	ENSMUSG00000091243
Myof	3	6.72e-47	-0.163295	ENSMUSG00000048612
Zfp36L1	2	1.04e-63	-0.159167	ENSMUSG00000021127
Utrn	3	1.85e-63	-0.157701	ENSMUSG00000019820
Gpc4	3	1.35e-48	-0.157414	ENSMUSG00000031119
Fam129B	3	1.52e-51	-0.156584	ENSMUSG00000026796
Col4A5	3	6.04e-83	-0.15499	ENSMUSG00000031274
Shroom3	3	5.65e-85	-0.153449	ENSMUSG00000029381
Col11A1	3	8.79e-71	-0.153345	ENSMUSG00000027966
Slc35F1	2	4.23e-151	-0.151139	ENSMUSG00000038602
Lamc1	2	7.09e-87	-0.149597	ENSMUSG00000026478
Egfr	2	5.11e-51	-0.149371	ENSMUSG00000020122
H2-K1	3	1.67e-57	-0.148349	ENSMUSG00000061232
S1Pr3	3	9.23e-225	-0.146604	ENSMUSG00000067586
Notch2	3	1.04e-74	-0.146176	ENSMUSG00000027878
Egr1	2	3.6e-91	-0.142193	ENSMUSG00000038418
Timp3	3	3.01e-113	-0.141894	ENSMUSG00000020044
Pbxip1	3	8.71e-47	-0.141196	ENSMUSG00000042613
Ctsd	3	1.49e-117	-0.141168	ENSMUSG00000007891
Nuak1	2	3.51e-61	-0.138744	ENSMUSG00000020032
Dtna	3	1.89e-113	-0.138389	ENSMUSG00000024302
Fstl1	3	4.07e-69	-0.137128	ENSMUSG00000022816
Ehd3	2	5.36e-49	-0.134162	ENSMUSG00000024065
Rin2	3	1.41e-52	-0.130375	ENSMUSG00000001768
Cnn3	3	9.77e-113	-0.129808	ENSMUSG00000053931
Tenm4	2	6.6e-79	-0.129251	ENSMUSG00000048078
Apoe	2	3.14e-115	-0.12866	ENSMUSG00000002985
Prss23	3	2.41e-49	-0.126536	ENSMUSG00000039405
Wwtr1	3	2.75e-70	-0.125001	ENSMUSG00000027803
Vim	3	1.03e-60	-0.124231	ENSMUSG00000026728
Id3	2	7.36e-109	-0.121245	ENSMUSG00000007872
Hspa5	3	9.64e-57	-0.120869	ENSMUSG00000026864
Pard3B	3	2.85e-61	-0.119426	ENSMUSG00000052062
Macf1	2	1.7e-219	-0.119355	ENSMUSG00000028649
Hif1A	2	3.11e-55	-0.118988	ENSMUSG00000021109
Palld	3	1.03e-72	-0.118092	ENSMUSG00000058056
Dkk3	3	3.44e-113	-0.116634	ENSMUSG00000030772
B2M	3	9.9e-102	-0.116205	ENSMUSG00000060802
Osbpl3	3	5.59e-53	-0.112527	ENSMUSG00000029822
Cst3	3	3.28e-87	-0.112101	ENSMUSG00000027447
Id1	2	1.38e-78	-0.111891	ENSMUSG00000042745
A2M	3	3.98e-47	-0.110219	ENSMUSG00000030111
Pdgfd	3	5.9e-47	-0.109576	ENSMUSG00000032006
Fat1	3	1.25e-49	-0.109323	ENSMUSG00000070047
Piezo2	2	7.12e-64	-0.107383	ENSMUSG00000041482
Ptprf	3	5.13e-54	-0.0973921	ENSMUSG00000033295
Sparc	3	1.3e-171	-0.0937414	ENSMUSG00000018593
Grip1	2	1.57e-51	-0.0862967	ENSMUSG00000034813
Erbin	1	1.49e-59	0.0844827	ENSMUSG00000021709
Ncoa1	1	8.07e-52	0.0866127	ENSMUSG00000020647
Slc9A9	1	3e-50	0.0910916	ENSMUSG00000031129
Tmtc2	1	3.84e-48	0.0914275	ENSMUSG00000036019
Anks1	1	2.28e-59	0.0935697	ENSMUSG00000024219
Akap9	1	1.37e-47	0.0937736	ENSMUSG00000040407
Olfm2	1	6.1e-74	0.0968924	ENSMUSG00000032172
Tmeff2	1	2.94e-87	0.0981698	ENSMUSG00000026109
Ankrd28	1	2.73e-72	0.103179	ENSMUSG00000014496
Clasp2	1	5.72e-50	0.104498	ENSMUSG00000033392
Calm1	1	5.91e-66	0.10696	ENSMUSG00000001175
Apbb2	1	4.43e-57	0.107719	ENSMUSG00000029207
Nlgn1	1	8.04e-252	0.108589	ENSMUSG00000063887
Hdac9	1	2.97e-50	0.109565	ENSMUSG00000004698
Miat	1	8.9e-83	0.111287	ENSMUSG00000097767
Tox	1	6.37e-78	0.113494	ENSMUSG00000041272
Glce	1	7.51e-76	0.114141	ENSMUSG00000032252
Kdr	2	3.88e-87	0.115683	ENSMUSG00000062960
Rtn4	1	2.36e-114	0.116353	ENSMUSG00000020458
Gpm6A	1	1.32e-101	0.116571	ENSMUSG00000031517
Rere	1	3.88e-110	0.118326	ENSMUSG00000039852
Syt11	1	1.32e-110	0.119157	ENSMUSG00000068923
Dhx32	1	4.3e-93	0.119649	ENSMUSG00000030986
Eya2	1	4.99e-47	0.122155	ENSMUSG00000017897
Prox1	1	8.87e-99	0.123266	ENSMUSG00000010175
Acsl3	1	1.07e-80	0.123309	ENSMUSG00000032883
Clip3	1	1.84e-53	0.123953	ENSMUSG00000013921
Padi2	1	1.38e-47	0.124529	ENSMUSG00000028927
Agap1	1	5.23e-56	0.124837	ENSMUSG00000055013
Mir100Hg	1	1.01e-51	0.125559	ENSMUSG00000074415
Sox4	1	1.24e-152	0.130185	ENSMUSG00000076431
Trim2	1	3.42e-145	0.131692	ENSMUSG00000027993
Kif21A	1	3.61e-62	0.131733	ENSMUSG00000022629
Auts2	1	7.09e-180	0.132791	ENSMUSG00000029673
Tmem132B	1	7.28e-66	0.133511	ENSMUSG00000070498
Ssbp3	1	3.06e-51	0.134097	ENSMUSG00000061887
Gdpd5	1	4.15e-50	0.13505	ENSMUSG00000035314
Efna5	1	6.02e-119	0.135238	ENSMUSG00000048915
Kirrel3	1	1.4e-89	0.135501	ENSMUSG00000032036
Macrod2	1	6.63e-87	0.136061	ENSMUSG00000068205
Lsamp	1	5.04e-150	0.137883	ENSMUSG00000061080
Ptprs	1	5.14e-105	0.138055	ENSMUSG00000013236
Cntn1	1	1.38e-59	0.138957	ENSMUSG00000055022
Rorb	1	5.87e-198	0.140058	ENSMUSG00000036192
Tspan14	1	4.43e-48	0.140499	ENSMUSG00000037824
Chd7	1	2.69e-180	0.140754	ENSMUSG00000041235
Rgs16	1	1.15e-48	0.14302	ENSMUSG00000026475
Nedd4L	1	2.74e-105	0.144881	ENSMUSG00000024589
Tox3	1	2.11e-99	0.145353	ENSMUSG00000043668
Ctnnd2	1	3.3e-146	0.149877	ENSMUSG00000022240
Negr1	1	3.23e-93	0.150781	ENSMUSG00000040037
Qsox1	1	4.83e-149	0.153491	ENSMUSG00000033684
Mob3B	1	5.39e-72	0.1536	ENSMUSG00000073910
Eml6	1	3.07e-82	0.159667	ENSMUSG00000044072
Pik3R1	1	2.17e-272	0.160978	ENSMUSG00000041417
Mapk10	1	3.07e-54	0.1611	ENSMUSG00000046709
Ralgps1	1	7.9e-53	0.161788	ENSMUSG00000038831
Shisal1	1	4.83e-50	0.162397	ENSMUSG00000062760
Coro2B	1	7.3e-93	0.162818	ENSMUSG00000041729
Mpzl1	1	7.1e-54	0.165552	ENSMUSG00000026566
Astn1	1	6.16e-137	0.166749	ENSMUSG00000026587
A230057D06Rik	1	2.34e-97	0.167237	ENSMUSG00000109394
Cadps	1	2.3e-105	0.171518	ENSMUSG00000054423
Pak3	1	0	0.171567	ENSMUSG00000031284
Map2	1	5.56e-264	0.171672	ENSMUSG00000015222
Sfxn5	1	3.19e-72	0.172612	ENSMUSG00000033720
Dlg2	1	7.56e-53	0.173038	ENSMUSG00000052572
Grik2	1	2.4e-50	0.17412	ENSMUSG00000056073
Nol4	1	1.62e-169	0.17638	ENSMUSG00000041923
Olfm1	1	1.53e-78	0.178219	ENSMUSG00000026833
Ctnna2	1	5.67e-177	0.179381	ENSMUSG00000063063
Sh3Kbp1	1	2.17e-87	0.182411	ENSMUSG00000040990
Mapt	1	3.18e-82	0.183989	ENSMUSG00000018411
Gnao1	1	8.33e-48	0.184646	ENSMUSG00000031748
Msi1	1	3.81e-72	0.186046	ENSMUSG00000054256
Angpt1	1	2.77e-53	0.187086	ENSMUSG00000022309
Crb1	1	7.81e-140	0.189637	ENSMUSG00000063681
Nav1	1	4.13e-264	0.190411	ENSMUSG00000009418
Ppm1L	1	1.16e-55	0.191779	ENSMUSG00000027784
Syne1	1	4.08e-65	0.194973	ENSMUSG00000096054
Snap91	1	4.55e-51	0.195423	ENSMUSG00000033419
Ccser1	1	1.05e-133	0.196267	ENSMUSG00000039578
Cdh20	1	9.9e-101	0.196696	ENSMUSG00000050840
Rps6Ka5	1	1.03e-126	0.197552	ENSMUSG00000021180
Sel1L3	1	7.53e-67	0.199768	ENSMUSG00000029189
Klf12	1	8.74e-90	0.201777	ENSMUSG00000072294
Sbk1	1	1.44e-66	0.202035	ENSMUSG00000042978
Podxl2	1	1.74e-127	0.210356	ENSMUSG00000033152
Eml5	1	2.33e-188	0.210555	ENSMUSG00000051166
Epb41	1	1.5e-98	0.220894	ENSMUSG00000028906
Nrp1	1	1.02e-198	0.231746	ENSMUSG00000025810
Parp8	1	4.02e-273	0.23772	ENSMUSG00000021725
Otud7A	1	1.15e-153	0.239155	ENSMUSG00000033510
Pcdh15	1	2.75e-208	0.243785	ENSMUSG00000052613
Syt1	1	8.66e-133	0.244618	ENSMUSG00000035864
Cacna1D	1	3.76e-69	0.245045	ENSMUSG00000015968
St8Sia5	1	1.7e-79	0.246542	ENSMUSG00000025425
Rims2	1	1.01e-83	0.251965	ENSMUSG00000037386
Tmem178B	1	6.8e-198	0.252168	ENSMUSG00000057716
Khdrbs2	1	3.48e-110	0.259362	ENSMUSG00000026058
Sept3	1	6.97e-65	0.261036	ENSMUSG00000022456
Nmnat2	1	1.36e-49	0.266001	ENSMUSG00000042751
Tenm2	1	2.37e-98	0.27019	ENSMUSG00000049336
Brinp2	1	1.8e-165	0.272397	ENSMUSG00000004031
B3Galt2	1	2.52e-48	0.283873	ENSMUSG00000033849
Soga3	1	1.11e-72	0.286867	ENSMUSG00000038916
Atp2B2	1	4.13e-60	0.28775	ENSMUSG00000030302
Gm49353	1	2.98e-54	0.289227	ENSMUSG00000110723
Nrxn1	1	9.99e-254	0.297542	ENSMUSG00000024109
Map2K6	1	8.12e-54	0.302422	ENSMUSG00000020623
Unc79	1	1.07e-80	0.311843	ENSMUSG00000021198
Acsl6	1	1.14e-59	0.315726	ENSMUSG00000020333
Nrg3	1	5.91e-96	0.318061	ENSMUSG00000041014
Slit1	1	2.14e-85	0.328093	ENSMUSG00000025020
Nrxn3	1	0	0.333545	ENSMUSG00000066392
C530008M17Rik	1	7.42e-109	0.337079	ENSMUSG00000036377
Scn8A	1	6e-60	0.339315	ENSMUSG00000023033
Srrm4	1	2.37e-64	0.345155	ENSMUSG00000063919
Disp3	1	8.97e-92	0.35088	ENSMUSG00000041544
Btbd11	1	7.83e-55	0.358693	ENSMUSG00000020042
Ptprn2	1	1.64e-113	0.36062	ENSMUSG00000056553
Celf4	1	1.45e-126	0.364364	ENSMUSG00000024268
Rgs7	1	2.92e-90	0.365057	ENSMUSG00000026527
Myt1	1	2.84e-120	0.369621	ENSMUSG00000010505
Cacna1B	1	2.28e-54	0.373488	ENSMUSG00000004113
Dcc	1	5.95e-50	0.377239	ENSMUSG00000060534
Dscaml1	1	4.29e-102	0.405969	ENSMUSG00000032087
Alk	1	6.75e-198	0.421798	ENSMUSG00000055471
Neurog2	1	1.14e-53	0.427339	ENSMUSG00000027967
Scg3	1	2.91e-96	0.436731	ENSMUSG00000032181
Fam155A	1	3.36e-51	0.439581	ENSMUSG00000079157
Pak7	1	1.92e-82	0.457114	ENSMUSG00000039913
Gabrb3	1	1.81e-54	0.464026	ENSMUSG00000033676
Elavl3	1	1.48e-149	0.466811	ENSMUSG00000003410
Apba2	1	2.36e-61	0.499688	ENSMUSG00000030519
Sv2B	1	6.93e-66	0.524168	ENSMUSG00000053025
Snap25	1	4.92e-49	0.52849	ENSMUSG00000027273
Dync1I1	1	1.84e-83	0.555624	ENSMUSG00000029757
Chgb	1	1.39e-62	0.631958	ENSMUSG00000027350
Asic2	1	3.32e-109	0.642792	ENSMUSG00000020704
1700018A04Rik	1	1.78e-62	13.7265	ENSMUSG00000038408
Gm42531	1	1.78e-62	13.7265	ENSMUSG00000107178
Rdh16F2	1	1.78e-62	13.7265	ENSMUSG00000074639
Vmn2R13	1	1.78e-62	13.7265	ENSMUSG00000091635
6330409D20Rik	1	1.29e-186	19.3521	ENSMUSG00000009551
Gm49742	1	0	26.2819	ENSMUSG00000116850
