# Supplementary material for: A multiplexed, single-cell sequencing screen identifies compounds that increase neurogenic reprogramming of murine Muller glia
Source: eLife. 2024 Dec 12;12:RP92091. doi: 10.7554/eLife.92091 (PMC11637464; doi:10.7554/eLife.92091)
Supplement: Figure 2—source data 1. [file elife-92091-fig2-data1.xlsx]

## Sheet: Sheet1
drug_name	target	molecule_number	collection_day	drug_treatment_log2fc	Neuronal_log2fc	ProL_log2fc	top_oligo	size_factor	total_cells	ProL	Neuronal	Transition	ER_stressed	Undefined_neuron	Unknown	MG	Immune_reactive	dose_uM	plate	raw_total_cells	bp_over_prog
(R)-(+)-Bay K 8644	Ion channels	1545	1	(R)-(+)-Bay K 8644_0.1uM	-0.251539	0.447459	1545.0.1uM.plate19	0.858187	67	29	20	17	1	0	0	0	0	0.1	plate19	58	0.689655
(R)-(+)-Bay K 8644	Ion channels	1545	1	(R)-(+)-Bay K 8644_10uM	-0.836501	0.447459	1545.10uM.plate19	0.680631	67	29	13	24	0	0	0	0	1	10	plate19	46	0.448276
(R)-(+)-Bay K 8644	Ion channels	1545	1	(R)-(+)-Bay K 8644_1uM	-0.643856	0.825971	1545.1uM.plate19	0.739816	68	38	15	15	0	0	0	0	0	1	plate19	50	0.394737
1-EBIO	Ion channels	1041	1	1-EBIO_0.1uM	-0.184425	0.398549	1041.0.1uM.plate19	0.917372	68	28	21	19	0	0	0	0	0	0.1	plate19	62	0.75
1-EBIO	Ion channels	1041	1	1-EBIO_10uM	-0.120294	0.295456	1041.10uM.plate19	0.784205	68	26	22	20	0	0	0	0	0	10	plate19	53	0.846154
1-EBIO	Ion channels	1041	1	1-EBIO_1uM	-0.473931	0.540568	1041.1uM.plate19	0.917372	68	31	17	19	1	0	0	0	0	1	plate19	62	0.548387
8-Bromo-cAMP, sodium salt	Metabolic regulation	1140	1	8-Bromo-cAMP, sodium salt_0.1uM	-0.473931	0.398549	1140.0.1uM.plate19	0.88778	68	28	17	23	0	0	0	0	0	0.1	plate19	60	0.607143
8-Bromo-cAMP, sodium salt	Metabolic regulation	1140	1	8-Bromo-cAMP, sodium salt_10uM	-0.736966	0.862496	1140.10uM.plate19	1.31687	68	39	14	14	0	0	1	0	0	10	plate19	89	0.358974
8-Bromo-cAMP, sodium salt	Metabolic regulation	1140	1	8-Bromo-cAMP, sodium salt_1uM	-0.251539	0.494765	1140.1uM.plate19	0.88778	67	30	20	16	0	0	0	1	0	1	plate19	60	0.666667
AM 580	Retinoic acid signaling	760	1	AM 580_0.1uM	-1.32193	0.862496	760.0.1uM.plate19	1.16891	67	39	9	18	0	0	1	0	0	0.1	plate19	79	0.230769
AM 580	Retinoic acid signaling	760	1	AM 580_1uM	-0.251539	0.398549	760.1uM.plate19	0.976558	67	28	20	19	0	0	0	0	0	1	plate19	66	0.714286
CD 437	Retinoic acid signaling	1549	1	CD 437_0.1uM	-0.251539	0.494765	1549.0.1uM.plate19	0.636242	68	30	20	16	0	0	2	0	0	0.1	plate19	43	0.666667
Ceramide	Other kinase signaling	744	1	Ceramide_0.1uM	-0.643856	0.584963	744.0.1uM.plate19	1.2281	67	32	15	20	0	0	0	0	0	0.1	plate19	83	0.46875
Ceramide	Other kinase signaling	744	1	Ceramide_1uM	-0.736966	0.0641303	744.1uM.plate19	1.03574	68	22	14	31	0	0	0	0	1	1	plate19	70	0.636364
CI 994	Epigenetic	2952	1	CI 994_0.1uM	-0.643856	0.628031	2952.0.1uM.plate19	1.12452	68	33	15	19	0	0	0	0	1	0.1	plate19	76	0.454545
CI 994	Epigenetic	2952	1	CI 994_10uM	-4.64386	-2.1375	2952.10uM.plate19	0.991354	67	4	0	12	1	0	50	0	0	10	plate19	67	0
CI 994	Epigenetic	2952	1	CI 994_1uM	-0.943416	0.966833	2952.1uM.plate19	1.39085	68	42	12	14	0	0	0	0	0	1	plate19	94	0.285714
Clemastine fumarate	Other	1453	1	Clemastine fumarate_0.1uM	-0.943416	0.540568	1453.0.1uM.plate19	0.739816	67	31	12	23	0	0	0	0	1	0.1	plate19	50	0.387097
Clemastine fumarate	Other	1453	1	Clemastine fumarate_1uM	-0.836501	0.628031	1453.1uM.plate19	0.606649	67	33	13	21	0	0	0	0	0	1	plate19	41	0.393939
Cyclosporin A	Other kinase signaling	1101	1	Cyclosporin A_0.1uM	-0.643856	0.241008	1101.0.1uM.plate19	0.976558	68	25	15	27	1	0	0	0	0	0.1	plate19	66	0.6
Decitabine	Epigenetic	2624	1	Decitabine_0.1uM	-0.473931	0.540568	2624.0.1uM.plate19	1.00615	68	31	17	19	0	0	0	0	1	0.1	plate19	68	0.548387
Decitabine	Epigenetic	2624	1	Decitabine_10uM	-0.556393	0.540568	2624.10uM.plate19	1.25769	68	31	16	20	0	0	1	0	0	10	plate19	85	0.516129
Decitabine	Epigenetic	2624	1	Decitabine_1uM	-0.184425	0.241008	2624.1uM.plate19	1.05054	68	25	21	21	1	0	0	0	0	1	plate19	71	0.84
Dibutyryl-cAMP, sodium salt	Metabolic regulation	1141	1	Dibutyryl-cAMP, sodium salt_0.1uM	-0.184425	0.398549	1141.0.1uM.plate19	1.09493	67	28	21	17	0	1	0	0	0	0.1	plate19	74	0.75
Dibutyryl-cAMP, sodium salt	Metabolic regulation	1141	1	Dibutyryl-cAMP, sodium salt_10uM	-1.05889	0.862496	1141.10uM.plate19	0.710224	67	39	11	17	0	0	0	0	0	10	plate19	48	0.282051
Dorsomorphin dihydrochloride	Metabolic regulation	3093	1	Dorsomorphin dihydrochloride_0.1uM	-0.556393	0.398549	3093.0.1uM.plate19	1.12452	68	28	16	24	0	0	0	0	0	0.1	plate19	76	0.571429
Dorsomorphin dihydrochloride	Metabolic regulation	3093	1	Dorsomorphin dihydrochloride_1uM	0	0	3093.1uM.plate19	1.1985	68	21	24	23	0	0	0	0	0	1	plate19	81	1.14286
EHNA hydrochloride	Metabolic regulation	1261	1	EHNA hydrochloride_0.1uM	0.0565835	0.628031	1261.0.1uM.plate19	0.636242	67	33	25	9	0	0	0	0	0	0.1	plate19	43	0.757576
EHNA hydrochloride	Metabolic regulation	1261	1	EHNA hydrochloride_1uM	-0.321928	0.584963	1261.1uM.plate19	0.754613	68	32	19	17	0	0	0	0	0	1	plate19	51	0.59375
Fluoxetine hydrochloride	Serotonin regulation	927	1	Fluoxetine hydrochloride_0.1uM	-0.473931	0.669851	927.0.1uM.plate19	0.769409	68	34	17	17	0	0	0	0	0	0.1	plate19	52	0.5
Fluoxetine hydrochloride	Serotonin regulation	927	1	Fluoxetine hydrochloride_1uM	-0.643856	0.295456	927.1uM.plate19	1.33167	68	26	15	26	0	0	0	1	0	1	plate19	90	0.576923
Forskolin	Metabolic regulation	1099	1	Forskolin_0.1uM	-0.120294	0.447459	1099.0.1uM.plate19	0.858187	67	29	22	16	0	0	0	0	0	0.1	plate19	58	0.758621
Forskolin	Metabolic regulation	1099	1	Forskolin_10uM	-0.184425	0.447459	1099.10uM.plate19	0.665835	68	29	21	18	0	0	0	0	0	10	plate19	45	0.724138
Forskolin	Metabolic regulation	1099	1	Forskolin_1uM	-0.251539	0	1099.1uM.plate19	0.858187	68	21	20	26	0	1	0	0	0	1	plate19	58	0.952381
GANT 61	Hedgehog signaling	3191	1	GANT 61_0.1uM	-0.395929	0.494765	3191.0.1uM.plate19	1.06534	68	30	18	19	0	1	0	0	0	0.1	plate19	72	0.6
GANT 61	Hedgehog signaling	3191	1	GANT 61_10uM	0.163499	0.184425	3191.10uM.plate19	0.739816	67	24	27	16	0	0	0	0	0	10	plate19	50	1.125
H 89 dihydrochloride	Metabolic regulation	2910	1	H 89 dihydrochloride_0.1uM	-0.184425	0.125531	2910.0.1uM.plate19	1.36126	68	23	21	24	0	0	0	0	0	0.1	plate19	92	0.913043
H 89 dihydrochloride	Metabolic regulation	2910	1	H 89 dihydrochloride_1uM	-0.943416	0.398549	2910.1uM.plate19	1.16891	68	28	12	27	0	1	0	0	0	1	plate19	79	0.428571
Kenpaullone	Cell cycle	1398	1	Kenpaullone_0.1uM	-0.0588937	0.347923	1398.0.1uM.plate19	0.665835	68	27	23	18	0	0	0	0	0	0.1	plate19	45	0.851852
Kenpaullone	Cell cycle	1398	1	Kenpaullone_1uM	-0.184425	0.494765	1398.1uM.plate19	0.843391	68	30	21	17	0	0	0	0	0	1	plate19	57	0.7
LY 294002 hydrochloride	Akt/PI3K signaling	1130	1	LY 294002 hydrochloride_0.1uM	-0.943416	0.447459	1130.0.1uM.plate19	0.976558	68	29	12	27	0	0	0	0	0	0.1	plate19	66	0.413793
LY 294002 hydrochloride	Akt/PI3K signaling	1130	1	LY 294002 hydrochloride_10uM	-1.8365	1.21299	1130.10uM.plate19	0.902576	68	50	6	12	0	0	0	0	0	10	plate19	61	0.12
LY 294002 hydrochloride	Akt/PI3K signaling	1130	1	LY 294002 hydrochloride_1uM	-0.321928	0.584963	1130.1uM.plate19	1.06534	68	32	19	17	0	0	0	0	0	1	plate19	72	0.59375
Metformin hydrochloride	Metabolic regulation	2864	1	Metformin hydrochloride_0.1uM	-0.184425	0.241008	2864.0.1uM.plate19	1.50923	68	25	21	22	0	0	0	0	0	0.1	plate19	102	0.84
Metformin hydrochloride	Metabolic regulation	2864	1	Metformin hydrochloride_10uM	-0.556393	0.669851	2864.10uM.plate19	1.46484	67	34	16	17	0	0	0	0	0	10	plate19	99	0.470588
Metformin hydrochloride	Metabolic regulation	2864	1	Metformin hydrochloride_1uM	-0.321928	0.347923	2864.1uM.plate19	1.90873	67	27	19	21	0	0	0	0	0	1	plate19	129	0.703704
			1	NoAscl1_0uM	-3.05889	-1.28951	NoAscl1.C.plate19	0.651038	69	5	2	2	0	0	2	58	0	NA	plate19	44	0.4
			1	NoAscl1_0uM	-3.05889	-1.28951	NoAscl1.A.plate19	0.88778	67	11	2	0	0	0	1	53	0	NA	plate19	60	0.181818
PD 173074	Other kinase signaling	3044	1	PD 173074_0.1uM	-0.473931	0.540568	3044.0.1uM.plate19	1.49443	67	31	17	19	0	0	0	0	0	0.1	plate19	101	0.548387
PD 173074	Other kinase signaling	3044	1	PD 173074_1uM	-0.473931	0.494765	3044.1uM.plate19	0.843391	68	30	17	21	0	0	0	0	0	1	plate19	57	0.566667
PD 407824	TGF-beta signaling	2694	1	PD 407824_0.1uM	0.163499	0.184425	2694.0.1uM.plate19	1.00615	68	24	27	17	0	0	0	0	0	0.1	plate19	68	1.125
PD 98059	Other kinase signaling	1213	1	PD 98059_0.1uM	-0.736966	0.584963	1213.0.1uM.plate19	1.00615	68	32	14	22	0	0	0	0	0	0.1	plate19	68	0.4375
PD 98059	Other kinase signaling	1213	1	PD 98059_10uM	-0.120294	0.494765	1213.10uM.plate19	0.636242	68	30	22	16	0	0	0	0	0	10	plate19	43	0.733333
PD 98059	Other kinase signaling	1213	1	PD 98059_1uM	-0.321928	0.184425	1213.1uM.plate19	0.843391	68	24	19	25	0	0	0	0	0	1	plate19	57	0.791667
SANT-1	Hedgehog signaling	1974	1	SANT-1_0.1uM	-0.251539	0.184425	1974.0.1uM.plate19	1.06534	68	24	20	23	0	0	0	0	1	0.1	plate19	72	0.833333
SANT-1	Hedgehog signaling	1974	1	SANT-1_10uM	-0.473931	0.710493	1974.10uM.plate19	1.06534	68	35	17	15	1	0	0	0	0	10	plate19	72	0.485714
SANT-1	Hedgehog signaling	1974	1	SANT-1_1uM	-0.120294	-0.289507	1974.1uM.plate19	1.27248	68	17	22	28	0	1	0	0	0	1	plate19	86	1.29412
SB 203580	Other kinase signaling	1202	1	SB 203580_0.1uM	0.0565835	0.584963	1202.0.1uM.plate19	0.813798	68	32	25	11	0	0	0	0	0	0.1	plate19	55	0.78125
SB 203580	Other kinase signaling	1202	1	SB 203580_10uM	-1.64386	0.669851	1202.10uM.plate19	0.680631	68	34	7	24	0	0	3	0	0	10	plate19	46	0.205882
SB 203580	Other kinase signaling	1202	1	SB 203580_1uM	-1.18442	1	1202.1uM.plate19	0.946965	68	43	10	15	0	0	0	0	0	1	plate19	64	0.232558
SB 431542	TGF-beta signaling	1614	1	SB 431542_0.1uM	-0.184425	0.0641303	1614.0.1uM.plate19	0.872983	68	22	21	25	0	0	0	0	0	0.1	plate19	59	0.954545
SB 431542	TGF-beta signaling	1614	1	SB 431542_10uM	0.565597	-0.459432	1614.10uM.plate19	0.946965	68	15	36	17	0	0	0	0	0	10	plate19	64	2.4
SB 431542	TGF-beta signaling	1614	1	SB 431542_1uM	0.485427	-0.211504	1614.1uM.plate19	0.961761	68	18	34	16	0	0	0	0	0	1	plate19	65	1.88889
Sodium 4-Phenylbutyrate	Epigenetic	2682	1	Sodium 4-Phenylbutyrate_0.1uM	-0.473931	0.494765	2682.0.1uM.plate19	1.83474	68	30	17	21	0	0	0	0	0	0.1	plate19	124	0.566667
Sodium 4-Phenylbutyrate	Epigenetic	2682	1	Sodium 4-Phenylbutyrate_10uM	-0.251539	-0.289507	2682.10uM.plate19	1.27248	68	17	20	31	0	0	0	0	0	10	plate19	86	1.17647
Sodium 4-Phenylbutyrate	Epigenetic	2682	1	Sodium 4-Phenylbutyrate_1uM	0.263034	-0.137504	2682.1uM.plate19	1.598	67	19	29	19	0	0	0	0	0	1	plate19	108	1.52632
Troglitazone	PPARgamma regulation	3114	1	Troglitazone_0.1uM	0	0	3114.0.1uM.plate19	1.36126	67	21	24	21	0	1	0	0	0	0.1	plate19	92	1.14286
Valproic acid, sodium salt	Epigenetic	2815	1	Valproic acid, sodium salt_0.1uM	-0.556393	0.540568	2815.0.1uM.plate19	1.83474	68	31	16	21	0	0	0	0	0	0.1	plate19	124	0.516129
Valproic acid, sodium salt	Epigenetic	2815	1	Valproic acid, sodium salt_10uM	-0.395929	0.540568	2815.10uM.plate19	1.31687	67	31	18	18	0	0	0	0	0	10	plate19	89	0.580645
Valproic acid, sodium salt	Epigenetic	2815	1	Valproic acid, sodium salt_1uM	-0.473931	0.184425	2815.1uM.plate19	1.53882	68	24	17	27	0	0	0	0	0	1	plate19	104	0.708333
Y-27632 dihydrochloride	Rho signaling	1254	1	Y-27632 dihydrochloride_0.1uM	-0.643856	0.447459	1254.0.1uM.plate19	0.872983	68	29	15	24	0	0	0	0	0	0.1	plate19	59	0.517241
5-Azacytidine	Epigenetic	3842	2	5-Azacytidine_0.1uM	0.29956	0.180572	3842:0.1uM:plate7	0.583243	87	50	15	22	0	0	0	0	0	0.1	plate7	51	0.3
5-Azacytidine	Epigenetic	3842	2	5-Azacytidine_10uM	-0.70044	-0.0324215	3842:10uM:plate7	1.15505	87	43	7	32	0	0	2	3	0	10	plate7	101	0.162791
5-Azacytidine	Epigenetic	3842	2	5-Azacytidine_1uM	-0.530515	0.236067	3842:1uM:plate7	0.743349	87	52	8	20	1	3	0	3	0	1	plate7	65	0.153846
5-BrdU	Other	5015	2	5-BrdU_0.1uM	-0.70044	0.341037	5015:0.1uM:plate13	1.22367	87	56	7	19	3	0	0	2	0	0.1	plate13	107	0.125
5-BrdU	Other	5015	2	5-BrdU_10uM	-1.11548	-0.243926	5015:10uM:plate13	1.44095	88	37	5	33	8	2	0	3	0	10	plate13	126	0.135135
5-BrdU	Other	5015	2	5-BrdU_1uM	-0.530515	0.289507	5015:1uM:plate13	1.26941	88	54	8	19	7	0	0	0	0	1	plate13	111	0.148148
Alexidine dihydrochloride	Metabolic regulation	3979	2	Alexidine dihydrochloride_0.1uM	-1.70044	-2.16993	3979:0.1uM:plate7	1.075	88	9	3	16	0	0	0	60	0	0.1	plate7	94	0.333333
AMD 3465 hexahydrobromide	Cytokine signaling	4179	2	AMD 3465 hexahydrobromide_0.1uM	-0.115477	-0.0324215	4179:0.1uM:plate7	0.960636	87	43	11	33	0	0	0	0	0	0.1	plate7	84	0.255814
AMD 3465 hexahydrobromide	Cytokine signaling	4179	2	AMD 3465 hexahydrobromide_10uM	0.547488	0.0931094	4179:10uM:plate7	1.06356	88	47	18	21	0	0	2	0	0	10	plate7	93	0.382979
AMD 3465 hexahydrobromide	Cytokine signaling	4179	2	AMD 3465 hexahydrobromide_1uM	0	-0.36257	4179:1uM:plate7	1.05212	87	34	12	31	1	1	6	2	0	1	plate7	92	0.352941
BIO 5192	Cell adhesion	5051	2	BIO 5192_0.1uM	0.106915	0.0931094	5051:0.1uM:plate13	1.24654	87	47	13	26	0	1	0	0	0	0.1	plate13	109	0.276596
BIO 5192	Cell adhesion	5051	2	BIO 5192_10uM	0.206451	-0.134301	5051:10uM:plate13	0.926327	87	40	14	31	0	0	1	1	0	10	plate13	81	0.35
BIO 5192	Cell adhesion	5051	2	BIO 5192_1uM	0.206451	0	5051:1uM:plate13	1.31516	88	44	14	28	1	0	1	0	0	1	plate13	115	0.318182
BIX 01294	Epigenetic	3364	2	BIX 01294_0.1uM	0	0	3364:0.1uM:plate7	0.972072	87	44	12	30	0	0	1	0	0	0.1	plate7	85	0.272727
BIX 01294	Epigenetic	3364	2	BIX 01294_1uM	0.106915	0.0627358	3364:1uM:plate7	0.697605	87	46	13	27	0	0	0	1	0	1	plate7	61	0.282609
BOP	Cell adhesion	6047	2	BOP_0.1uM	0	-0.0655883	6047:0.1uM:plate13	1.26941	88	42	12	32	0	0	2	0	0	0.1	plate13	111	0.285714
BOP	Cell adhesion	6047	2	BOP_10uM	0.206451	0.0931094	6047:10uM:plate13	0.937763	88	47	14	27	0	0	0	0	0	10	plate13	82	0.297872
BOP	Cell adhesion	6047	2	BOP_1uM	0.547488	-0.0324215	6047:1uM:plate13	0.983508	87	43	18	25	0	0	0	1	0	1	plate13	86	0.418605
CASIN	Rho signaling	5050	2	CASIN_0.1uM	-0.115477	0.122857	5050:0.1uM:plate13	1.41808	86	48	11	25	0	1	1	0	0	0.1	plate13	124	0.229167
CASIN	Rho signaling	5050	2	CASIN_1uM	0.206451	0	5050:1uM:plate13	1.10931	88	44	14	27	1	1	1	0	0	1	plate13	97	0.318182
CCG 1423	Rho signaling	5233	2	CCG 1423_0.1uM	0.106915	-0.36257	5233:0.1uM:plate13	0.789094	88	34	13	33	1	3	3	1	0	0.1	plate13	69	0.382353
CCG 1423	Rho signaling	5233	2	CCG 1423_1uM	-0.115477	0.0317089	5233:1uM:plate13	1.31516	87	45	11	30	0	1	0	0	0	1	plate13	115	0.244444
CH 223191	Other TFs	3858	2	CH 223191_0.1uM	0	0	3858:0.1uM:plate7	0.972072	87	44	12	30	0	0	0	1	0	0.1	plate7	85	0.272727
CH 223191	Other TFs	3858	2	CH 223191_1uM	0.29956	-0.0324215	3858:1uM:plate7	0.892019	88	43	15	27	0	0	2	1	0	1	plate7	78	0.348837
CKI 7 dihydrochloride	Other kinase signaling	5329	2	CKI 7 dihydrochloride_0.1uM	0.206451	0.122857	5329:0.1uM:plate13	1.71542	88	48	14	24	0	0	2	0	0	0.1	plate13	150	0.291667
CKI 7 dihydrochloride	Other kinase signaling	5329	2	CKI 7 dihydrochloride_10uM	-0.115477	0.122857	5329:10uM:plate13	1.14361	88	48	11	24	0	3	1	1	0	10	plate13	100	0.229167
CKI 7 dihydrochloride	Other kinase signaling	5329	2	CKI 7 dihydrochloride_1uM	0.206451	-0.0324215	5329:1uM:plate13	1.31516	87	43	14	29	0	0	1	0	0	1	plate13	115	0.325581
CPI 203	Epigenetic	5331	2	CPI 203_0.1uM	-3.70044	0.315502	5331:0.1uM:plate13	1.075	87	55	0	22	0	0	0	10	0	0.1	plate13	94	0
CPI 203	Epigenetic	5331	2	CPI 203_10uM	-3.70044	-0.169925	5331:10uM:plate13	0.560371	87	39	0	23	0	0	0	25	0	10	plate13	49	0
CPI 203	Epigenetic	5331	2	CPI 203_1uM	-3.70044	0.462343	5331:1uM:plate13	0.892019	88	61	0	19	0	0	1	7	0	1	plate13	78	0
CW 008	Metabolic regulation	5495	2	CW 008_0.1uM	-0.241008	0.208587	5495:0.1uM:plate13	1.25798	88	51	10	26	0	0	1	0	0	0.1	plate13	110	0.196078
CW 008	Metabolic regulation	5495	2	CW 008_10uM	-1.70044	0.616671	5495:10uM:plate13	1.25798	88	68	3	14	0	1	1	1	0	10	plate13	110	0.0441177
CW 008	Metabolic regulation	5495	2	CW 008_1uM	-1.11548	0.462343	5495:1uM:plate13	2.00132	86	61	5	17	0	2	1	0	0	1	plate13	175	0.0819672
Cyclic Pifithrin-alpha hydrobromide	Cell cycle	3843	2	Cyclic Pifithrin-alpha hydrobromide_0.1uM	-0.530515	0.236067	3843:0.1uM:plate7	0.869147	87	52	8	26	1	0	0	0	0	0.1	plate7	76	0.153846
DBZ	Notch signaling	4489	2	DBZ_0.1uM	1.15754	-1.32193	4489:0.1uM:plate7	0.914891	86	17	28	39	0	1	1	0	0	0.1	plate7	80	1.64706
DBZ	Notch signaling	4489	2	DBZ_10uM	0.547488	-0.36257	4489:10uM:plate7	0.880583	87	34	18	27	0	0	0	8	0	10	plate7	77	0.529412
DBZ	Notch signaling	4489	2	DBZ_1uM	1.34395	-1.32193	4489:1uM:plate7	0.663296	89	17	32	38	0	2	0	0	0	1	plate7	58	1.88235
DMH-1	TGF-beta signaling	4126	2	DMH-1_0.1uM	0.387023	-0.206451	4126:0.1uM:plate7	1.28085	87	38	16	33	0	0	0	0	0	0.1	plate7	112	0.421053
DMH-1	TGF-beta signaling	4126	2	DMH-1_10uM	1.15754	-0.36257	4126:10uM:plate7	0.468882	87	34	28	23	0	0	2	0	0	10	plate7	41	0.823529
DMH-1	TGF-beta signaling	4126	2	DMH-1_1uM	1.10692	-0.791413	4126:1uM:plate7	0.674732	87	25	27	34	0	1	0	0	0	1	plate7	59	1.08
EC 19	Retinoic acid signaling	5849	2	EC 19_0.1uM	-0.530515	0.208587	5849:0.1uM:plate13	1.16649	87	51	8	28	0	0	0	0	0	0.1	plate13	102	0.156863
EC 19	Retinoic acid signaling	5849	2	EC 19_10uM	-2.70044	-0.968291	5849:10uM:plate13	1.88696	87	22	1	11	1	0	1	51	0	10	plate13	165	0.0454546
EC 19	Retinoic acid signaling	5849	2	EC 19_1uM	-0.530515	0	5849:1uM:plate13	1.34946	87	44	8	33	1	0	1	0	0	1	plate13	118	0.181818
EC 23	Retinoic acid signaling	4011	2	EC 23_0.1uM	0.106915	-0.321928	4011:0.1uM:plate7	1.30372	89	35	13	38	0	2	1	0	0	0.1	plate7	114	0.371429
EC 23	Retinoic acid signaling	4011	2	EC 23_1uM	-0.70044	0.236067	4011:1uM:plate7	0.709041	87	52	7	24	1	0	3	0	0	1	plate7	62	0.134615
endo-IWR 1	Wnt signaling	3532	2	endo-IWR 1_10uM	-0.378512	0.39079	3532:10uM:plate7	1.09787	87	58	9	17	1	0	2	0	0	10	plate7	96	0.155172
Epiblastin A	Other kinase signaling	6340	2	Epiblastin A_0.1uM	0	0.0317089	6340:0.1uM:plate13	1.05212	87	45	12	29	0	0	1	0	0	0.1	plate13	92	0.266667
Epiblastin A	Other kinase signaling	6340	2	Epiblastin A_10uM	-0.115477	0.122857	6340:10uM:plate13	1.05212	88	48	11	27	1	0	0	1	0	10	plate13	92	0.229167
Epiblastin A	Other kinase signaling	6340	2	Epiblastin A_1uM	-0.115477	0.236067	6340:1uM:plate13	0.697605	87	52	11	23	0	0	1	0	0	1	plate13	61	0.211538
EPZ 004777	Epigenetic	5567	2	EPZ 004777_10uM	0.691878	-0.0655883	5567:10uM:plate13	0.709041	87	42	20	23	1	1	0	0	0	10	plate13	62	0.47619
EPZ 004777	Epigenetic	5567	2	EPZ 004777_1uM	0.29956	-0.684498	5567:1uM:plate13	0.823402	88	27	15	43	1	2	0	0	0	1	plate13	72	0.555556
FH 1	Other	5254	2	FH 1_0.1uM	0.106915	-0.206451	5254:0.1uM:plate13	1.33803	87	38	13	36	0	0	0	0	0	0.1	plate13	117	0.342105
FH 1	Other	5254	2	FH 1_10uM	0	-0.169925	5254:10uM:plate13	1.2351	87	39	12	36	0	0	0	0	0	10	plate13	108	0.307692
FH 1	Other	5254	2	FH 1_1uM	-0.70044	0.152003	5254:1uM:plate13	1.28085	88	49	7	30	0	2	0	0	0	1	plate13	112	0.142857
GSK 429286	Rho signaling	3726	2	GSK 429286_0.1uM	0.206451	-0.134301	3726:0.1uM:plate7	0.777657	87	40	14	32	0	0	0	1	0	0.1	plate7	68	0.35
GSK 429286	Rho signaling	3726	2	GSK 429286_10uM	0.106915	-0.0995357	3726:10uM:plate7	0.754785	87	41	13	29	1	0	3	0	0	10	plate7	66	0.317073
GSK 429286	Rho signaling	3726	2	GSK 429286_1uM	0.106915	0.180572	3726:1uM:plate7	0.926327	88	50	13	23	0	0	1	1	0	1	plate7	81	0.26
GW 788388	TGF-beta signaling	3264	2	GW 788388_0.1uM	0.547488	0.0627358	3264:0.1uM:plate7	0.674732	88	46	18	24	0	0	0	0	0	0.1	plate7	59	0.391304
GW 788388	TGF-beta signaling	3264	2	GW 788388_10uM	0.758992	-0.206451	3264:10uM:plate7	0.65186	88	38	21	25	2	2	0	0	0	10	plate7	57	0.552632
GW 788388	TGF-beta signaling	3264	2	GW 788388_1uM	0.387023	-0.0995357	3264:1uM:plate7	0.709041	88	41	16	31	0	0	0	0	0	1	plate7	62	0.390244
I-BET 151 dihydrochloride	Epigenetic	4650	2	I-BET 151 dihydrochloride_0.1uM	-1.11548	0.462343	4650:0.1uM:plate7	1.41808	88	61	5	20	1	0	1	0	0	0.1	plate7	124	0.0819672
I-BET 151 dihydrochloride	Epigenetic	4650	2	I-BET 151 dihydrochloride_10uM	-2.11548	-0.584963	4650:10uM:plate7	0.548935	88	29	2	26	0	0	0	31	0	10	plate7	48	0.0689655
I-BET 151 dihydrochloride	Epigenetic	4650	2	I-BET 151 dihydrochloride_1uM	-3.70044	0.315502	4650:1uM:plate7	0.743349	87	55	0	23	0	0	0	9	0	1	plate7	65	0
INDY	Other	4997	2	INDY_0.1uM	-0.530515	0.152003	4997:0.1uM:plate13	1.44095	87	49	8	28	1	0	1	0	0	0.1	plate13	126	0.163265
INDY	Other	4997	2	INDY_10uM	-1.70044	0.438884	4997:10uM:plate13	1.57819	88	60	3	20	0	1	1	3	0	10	plate13	138	0.05
INDY	Other	4997	2	INDY_1uM	-0.70044	0.289507	4997:1uM:plate13	0.937763	87	54	7	25	0	0	0	1	0	1	plate13	82	0.12963
ISX 9	Other TFs	4439	2	ISX 9_0.1uM	-0.70044	0.208587	4439:0.1uM:plate7	0.731913	88	51	7	30	0	0	0	0	0	0.1	plate7	64	0.137255
ISX 9	Other TFs	4439	2	ISX 9_10uM	-2.70044	-2.32193	4439:10uM:plate7	1.49813	88	8	1	3	76	0	0	0	0	10	plate7	131	0.125
ISX 9	Other TFs	4439	2	ISX 9_1uM	-2.11548	0.236067	4439:1uM:plate7	0.983508	88	52	2	31	1	0	2	0	0	1	plate7	86	0.0384615
ITD 1	TGF-beta signaling	5068	2	ITD 1_0.1uM	0.29956	-0.2824	5068:0.1uM:plate13	0.972072	87	36	15	34	1	1	0	0	0	0.1	plate13	85	0.416667
ITD 1	TGF-beta signaling	5068	2	ITD 1_1uM	0.29956	-0.0324215	5068:1uM:plate13	0.926327	87	43	15	25	0	1	2	1	0	1	plate13	81	0.348837
JW 74	Wnt signaling	5653	2	JW 74_0.1uM	0.206451	-0.36257	5653:0.1uM:plate13	0.640424	89	34	14	30	2	2	2	5	0	0.1	plate13	56	0.411765
JW 74	Wnt signaling	5653	2	JW 74_1uM	0.206451	0.122857	5653:1uM:plate13	0.960636	88	48	14	23	0	1	0	2	0	1	plate13	84	0.291667
Kartogenin	Other TFs	4513	2	Kartogenin_0.1uM	0.387023	0.0627358	4513:0.1uM:plate7	1.04069	87	46	16	22	1	1	1	0	0	0.1	plate7	91	0.347826
Kartogenin	Other TFs	4513	2	Kartogenin_10uM	0	0.180572	4513:10uM:plate7	1.50957	88	50	12	25	0	1	0	0	0	10	plate7	132	0.24
Kartogenin	Other TFs	4513	2	Kartogenin_1uM	-0.530515	0.122857	4513:1uM:plate7	1.45239	88	48	8	30	0	0	1	1	0	1	plate7	127	0.166667
LDN 193189 dihydrochloride	TGF-beta signaling	6053	2	LDN 193189 dihydrochloride_0.1uM	0.29956	-0.491853	6053:0.1uM:plate13	0.869147	87	31	15	38	2	0	1	0	0	0.1	plate13	76	0.483871
Lin28 1632	Other	6068	2	Lin28 1632_0.1uM	-0.70044	0.208587	6068:0.1uM:plate13	1.25798	88	51	7	27	0	2	1	0	0	0.1	plate13	110	0.137255
Lin28 1632	Other	6068	2	Lin28 1632_10uM	-0.241008	0	6068:10uM:plate13	1.22367	88	44	10	32	0	2	0	0	0	10	plate13	107	0.227273
Lin28 1632	Other	6068	2	Lin28 1632_1uM	0	0.180572	6068:1uM:plate13	1.33803	87	50	12	25	0	0	0	0	0	1	plate13	117	0.24
Nicotinamide	Metabolic regulation	4106	2	Nicotinamide_0.1uM	0.29956	-0.0655883	4106:0.1uM:plate7	1.28085	88	42	15	30	0	1	0	0	0	0.1	plate7	112	0.357143
Nicotinamide	Metabolic regulation	4106	2	Nicotinamide_10uM	0.29956	-0.0655883	4106:10uM:plate7	1.50957	89	42	15	30	0	0	1	1	0	10	plate7	132	0.357143
Nicotinamide	Metabolic regulation	4106	2	Nicotinamide_1uM	-0.70044	0.152003	4106:1uM:plate7	1.74973	87	49	7	27	0	2	2	0	0	1	plate7	153	0.142857
			2	NoAscl1_0uM	-3.70044	-3.16993	NoAscl1:B:plate13	0.834838	87	2	0	1	0	0	0	0	84	0	plate13	73	0
			2	NoAscl1_0uM	-3.70044	-3.16993	NoAscl1:A:plate13	1.54388	88	6	0	0	1	1	0	0	80	0	plate13	135	0
NSC 23005 sodium	Cell cycle	5779	2	NSC 23005 sodium_0.1uM	0.106915	0	5779:0.1uM:plate13	1.24654	88	44	13	26	1	2	2	0	0	0.1	plate13	109	0.295455
NSC 23005 sodium	Cell cycle	5779	2	NSC 23005 sodium_10uM	-0.378512	0.236067	5779:10uM:plate13	1.52101	88	52	9	25	1	0	1	0	0	10	plate13	133	0.173077
NSC 23005 sodium	Cell cycle	5779	2	NSC 23005 sodium_1uM	-0.241008	0.0317089	5779:1uM:plate13	1.4867	89	45	10	30	1	1	1	1	0	1	plate13	130	0.222222
NSC 668036	Wnt signaling	5813	2	NSC 668036_0.1uM	-0.70044	0.236067	5813:0.1uM:plate13	0.709041	87	52	7	27	0	0	1	0	0	0.1	plate13	62	0.134615
NSC 668036	Wnt signaling	5813	2	NSC 668036_10uM	0.387023	0.0931094	5813:10uM:plate13	1.08643	88	47	16	23	0	0	0	2	0	10	plate13	95	0.340426
NSC 668036	Wnt signaling	5813	2	NSC 668036_1uM	0.29956	0.122857	5813:1uM:plate13	0.731913	88	48	15	25	0	0	0	0	0	1	plate13	64	0.3125
O4I2	Other TFs	5664	2	O4I2_0.1uM	0.206451	0.0931094	5664:0.1uM:plate13	1.38377	87	47	14	22	1	0	3	0	0	0.1	plate13	121	0.297872
O4I2	Other TFs	5664	2	O4I2_10uM	0.106915	-0.0995357	5664:10uM:plate13	0.709041	87	41	13	31	1	0	0	1	0	10	plate13	62	0.317073
O4I2	Other TFs	5664	2	O4I2_1uM	0.206451	0.0317089	5664:1uM:plate13	1.6125	88	45	14	28	0	0	1	0	0	1	plate13	141	0.311111
OAC-2	Other TFs	6066	2	OAC-2_0.1uM	0.106915	-0.0995357	6066:0.1uM:plate13	1.33803	87	41	13	31	0	0	1	1	0	0.1	plate13	117	0.317073
OAC-2	Other TFs	6066	2	OAC-2_1uM	-0.241008	0.315502	6066:1uM:plate13	1.05212	87	55	10	20	0	0	1	1	0	1	plate13	92	0.181818
PF 05089771	Ion channels	5931	2	PF 05089771_0.1uM	-0.70044	0.263034	5931:0.1uM:plate13	1.6125	87	53	7	24	1	2	0	0	0	0.1	plate13	141	0.132075
PF 05089771	Ion channels	5931	2	PF 05089771_10uM	-1.70044	0.366128	5931:10uM:plate13	1.32659	89	57	3	25	2	0	1	1	0	10	plate13	116	0.0526316
PF 05089771	Ion channels	5931	2	PF 05089771_1uM	-0.115477	0.208587	5931:1uM:plate13	1.93271	88	51	11	24	1	0	0	1	0	1	plate13	169	0.215686
Pioglitazone hydrochloride	PPARgamma regulation	4124	2	Pioglitazone hydrochloride_0.1uM	0	-0.0995357	4124:0.1uM:plate7	0.777657	88	41	12	32	0	0	3	0	0	0.1	plate7	68	0.292683
Pioglitazone hydrochloride	PPARgamma regulation	4124	2	Pioglitazone hydrochloride_10uM	-2.70044	0.508147	4124:10uM:plate7	0.994944	87	63	1	23	0	0	0	0	0	10	plate7	87	0.015873
Pioglitazone hydrochloride	PPARgamma regulation	4124	2	Pioglitazone hydrochloride_1uM	0	0	4124:1uM:plate7	1.17792	88	44	12	29	0	0	3	0	0	1	plate7	103	0.272727
PluriSln 1	Metabolic regulation	4847	2	PluriSln 1_0.1uM	0.206451	0.366128	4847:0.1uM:plate7	0.789094	87	57	14	16	0	0	0	0	0	0.1	plate7	69	0.245614
PluriSln 1	Metabolic regulation	4847	2	PluriSln 1_10uM	-0.115477	0.236067	4847:10uM:plate7	0.892019	87	52	11	21	0	0	2	1	0	10	plate7	78	0.211538
PluriSln 1	Metabolic regulation	4847	2	PluriSln 1_1uM	0	0.152003	4847:1uM:plate7	1.21223	88	49	12	26	0	0	1	0	0	1	plate7	106	0.244898
PNU 74654	Wnt signaling	3534	2	PNU 74654_0.1uM	-0.70044	0.236067	3534:0.1uM:plate7	1.15505	88	52	7	28	0	0	0	1	0	0.1	plate7	101	0.134615
PNU 74654	Wnt signaling	3534	2	PNU 74654_10uM	-0.115477	-0.0995357	3534:10uM:plate7	0.846274	87	41	11	34	0	0	1	0	0	10	plate7	74	0.268293
PNU 74654	Wnt signaling	3534	2	PNU 74654_1uM	0	0.180572	3534:1uM:plate7	0.972072	87	50	12	23	0	0	2	0	0	1	plate7	85	0.24
Purmorphamine	Hedgehog signaling	4551	2	Purmorphamine_0.1uM	0.29956	0.0317089	4551:0.1uM:plate7	1.50957	87	45	15	26	0	0	1	0	0	0.1	plate7	132	0.333333
Purmorphamine	Hedgehog signaling	4551	2	Purmorphamine_10uM	-1.11548	0.59561	4551:10uM:plate7	0.65186	88	67	5	14	0	0	2	0	0	10	plate7	57	0.0746269
Purmorphamine	Hedgehog signaling	4551	2	Purmorphamine_1uM	-0.241008	0.341037	4551:1uM:plate7	1.17792	88	56	10	19	0	1	2	0	0	1	plate7	103	0.178571
QS 11	Wnt signaling	3324	2	QS 11_0.1uM	-0.378512	0.208587	3324:0.1uM:plate7	1.01782	88	51	9	22	1	3	1	1	0	0.1	plate7	89	0.176471
QS 11	Wnt signaling	3324	2	QS 11_10uM	-1.37851	0.39079	3324:10uM:plate7	0.709041	87	58	4	21	1	0	0	3	0	10	plate7	62	0.0689655
QS 11	Wnt signaling	3324	2	QS 11_1uM	-1.11548	0.508147	3324:1uM:plate7	0.811966	87	63	5	17	1	0	0	1	0	1	plate7	71	0.0793651
RepSox	TGF-beta signaling	3742	2	RepSox_0.1uM	1.15754	-0.0995357	3742:0.1uM:plate7	0.537499	88	41	28	19	0	0	0	0	0	0.1	plate7	47	0.682927
RepSox	TGF-beta signaling	3742	2	RepSox_10uM	1.20645	-0.0655883	3742:10uM:plate7	0.548935	87	42	29	9	5	0	0	2	0	10	plate7	48	0.690476
RepSox	TGF-beta signaling	3742	2	RepSox_1uM	0.469485	0.315502	3742:1uM:plate7	0.914891	87	55	17	12	0	1	0	1	1	1	plate7	80	0.309091
RG 108	Epigenetic	3295	2	RG 108_0.1uM	0.106915	0.0317089	3295:0.1uM:plate7	0.594679	86	45	13	25	0	0	3	0	0	0.1	plate7	52	0.288889
RG 108	Epigenetic	3295	2	RG 108_10uM	0	0.180572	3295:10uM:plate7	0.80053	87	50	12	25	0	0	0	0	0	10	plate7	70	0.24
RG 108	Epigenetic	3295	2	RG 108_1uM	0.206451	-0.0655883	3295:1uM:plate7	0.571807	87	42	14	31	0	0	0	0	0	1	plate7	50	0.333333
Rosiglitazone	PPARgamma regulation	5325	2	Rosiglitazone_0.1uM	0.106915	-0.134301	5325:0.1uM:plate13	1.08643	88	40	13	29	2	2	2	0	0	0.1	plate13	95	0.325
Rosiglitazone	PPARgamma regulation	5325	2	Rosiglitazone_10uM	0	0.263034	5325:10uM:plate13	1.34946	88	53	12	22	0	0	1	0	0	10	plate13	118	0.226415
Rosiglitazone	PPARgamma regulation	5325	2	Rosiglitazone_1uM	0	0.180572	5325:1uM:plate13	1.12074	88	50	12	23	0	0	3	0	0	1	plate13	98	0.24
SAG 21k	Hedgehog signaling	5282	2	SAG 21k_0.1uM	0.206451	0.0317089	5282:0.1uM:plate13	1.29228	88	45	14	27	2	0	0	0	0	0.1	plate13	113	0.311111
SAG 21k	Hedgehog signaling	5282	2	SAG 21k_1uM	0.106915	0	5282:1uM:plate13	0.9492	87	44	13	27	0	2	1	0	0	1	plate13	83	0.295455
SAHA	Epigenetic	4652	2	SAHA_0.1uM	-0.378512	0.152003	4652:0.1uM:plate7	0.468882	88	49	9	28	0	0	2	0	0	0.1	plate7	41	0.183673
SAHA	Epigenetic	4652	2	SAHA_1uM	-3.70044	-0.906891	4652:1uM:plate7	0.789094	88	23	0	5	56	0	0	0	4	1	plate7	69	0
SGC AAK1 1	Wnt signaling	6528	2	SGC AAK1 1_0.1uM	-0.530515	0.180572	6528:0.1uM:plate13	1.42952	87	50	8	27	0	1	1	0	0	0.1	plate13	125	0.16
SGC AAK1 1	Wnt signaling	6528	2	SGC AAK1 1_10uM	0.106915	0.0931094	6528:10uM:plate13	1.60106	87	47	13	26	0	0	1	0	0	10	plate13	140	0.276596
SGC AAK1 1	Wnt signaling	6528	2	SGC AAK1 1_1uM	0.106915	0.366128	6528:1uM:plate13	1.26941	89	57	13	16	0	2	1	0	0	1	plate13	111	0.22807
SIS3	TGF-beta signaling	5291	2	SIS3_0.1uM	0	-0.2824	5291:0.1uM:plate13	1.21223	87	36	12	35	0	2	2	0	0	0.1	plate13	106	0.333333
SIS3	TGF-beta signaling	5291	2	SIS3_1uM	0	0.208587	5291:1uM:plate13	0.983508	87	51	12	24	0	0	0	0	0	1	plate13	86	0.235294
SMER 28	Other	4297	2	SMER 28_0.1uM	-0.530515	-0.0655883	4297:0.1uM:plate7	0.766221	88	42	8	38	0	0	0	0	0	0.1	plate7	67	0.190476
SMER 28	Other	4297	2	SMER 28_10uM	-0.893085	0.508147	4297:10uM:plate7	0.983508	87	63	6	17	0	0	0	1	0	10	plate7	86	0.0952381
SMER 28	Other	4297	2	SMER 28_1uM	0.29956	-0.134301	4297:1uM:plate7	0.960636	88	40	15	30	0	0	1	2	0	1	plate7	84	0.375
SR 3677 dihydrochloride	Rho signaling	3667	2	SR 3677 dihydrochloride_0.1uM	-0.241008	0.39079	3667:0.1uM:plate7	0.709041	88	58	10	17	0	0	3	0	0	0.1	plate7	62	0.172414
SR 3677 dihydrochloride	Rho signaling	3667	2	SR 3677 dihydrochloride_10uM	0.547488	-0.36257	3667:10uM:plate7	0.709041	87	34	18	34	0	1	0	0	0	10	plate7	62	0.529412
STF 31	Metabolic regulation	4484	2	STF 31_0.1uM	-0.70044	0.152003	4484:0.1uM:plate7	1.33803	88	49	7	30	0	1	0	1	0	0.1	plate7	117	0.142857
STF 31	Metabolic regulation	4484	2	STF 31_1uM	-0.530515	0.462343	4484:1uM:plate7	0.914891	87	61	8	17	0	0	1	0	0	1	plate7	80	0.131148
SU 16f	Other kinase signaling	3304	2	SU 16f_0.1uM	-1.11548	0.180572	3304:0.1uM:plate7	0.560371	87	50	5	32	0	0	0	0	0	0.1	plate7	49	0.1
SU 16f	Other kinase signaling	3304	2	SU 16f_1uM	-0.530515	-0.0995357	3304:1uM:plate7	0.731913	87	41	8	33	0	1	4	0	0	1	plate7	64	0.195122
SW 033291	Metabolic regulation	5759	2	SW 033291_10uM	-1.70044	-0.206451	5759:10uM:plate13	0.709041	87	38	3	7	6	1	0	31	1	10	plate13	62	0.0789474
SW 033291	Metabolic regulation	5759	2	SW 033291_1uM	0.206451	-0.134301	5759:1uM:plate13	1.37234	87	40	14	26	1	2	3	1	0	1	plate13	120	0.35
TCS 2210	Other	3877	2	TCS 2210_0.1uM	-0.378512	-0.134301	3877:0.1uM:plate7	0.548935	88	40	9	31	4	4	0	0	0	0.1	plate7	48	0.225
TCS 2210	Other	3877	2	TCS 2210_10uM	-1.70044	-0.736966	3877:10uM:plate7	0.777657	88	26	3	21	35	1	1	1	0	10	plate7	68	0.115385
TCS 2210	Other	3877	2	TCS 2210_1uM	-1.11548	0.289507	3877:1uM:plate7	0.594679	88	54	5	20	5	0	2	2	0	1	plate7	52	0.0925926
Tranylcypromine hydrochloride	Epigenetic	3852	2	Tranylcypromine hydrochloride_0.1uM	-0.893085	0.0317089	3852:0.1uM:plate7	1.18936	88	45	6	33	1	1	1	0	1	0.1	plate7	104	0.133333
Tranylcypromine hydrochloride	Epigenetic	3852	2	Tranylcypromine hydrochloride_10uM	-1.37851	0.341037	3852:10uM:plate7	1.32659	89	56	4	26	0	0	1	2	0	10	plate7	116	0.0714286
Tranylcypromine hydrochloride	Epigenetic	3852	2	Tranylcypromine hydrochloride_1uM	-2.11548	0.366128	3852:1uM:plate7	1.13218	88	57	2	26	0	1	1	0	1	1	plate7	99	0.0350877
Trazodone hydrochloride	Serotonin regulation	6336	2	Trazodone hydrochloride_0.1uM	0.106915	0	6336:0.1uM:plate13	2.01276	86	44	13	27	0	1	1	0	0	0.1	plate13	176	0.295455
Trazodone hydrochloride	Serotonin regulation	6336	2	Trazodone hydrochloride_10uM	0.206451	0.180572	6336:10uM:plate13	1.16649	89	50	14	20	1	3	1	0	0	10	plate13	102	0.28
Trazodone hydrochloride	Serotonin regulation	6336	2	Trazodone hydrochloride_1uM	0	0.122857	6336:1uM:plate13	1.08643	88	48	12	23	0	1	2	2	0	1	plate13	95	0.25
WH-4-023	Other kinase signaling	5413	2	WH-4-023_0.1uM	0.106915	0	5413:0.1uM:plate13	0.846274	88	44	13	31	0	0	0	0	0	0.1	plate13	74	0.295455
WH-4-023	Other kinase signaling	5413	2	WH-4-023_1uM	0.943416	-0.321928	5413:1uM:plate13	0.571807	87	35	24	28	0	0	0	0	0	1	plate13	50	0.685714
XAV 939	Wnt signaling	3748	2	XAV 939_0.1uM	-0.378512	0.0627358	3748:0.1uM:plate7	1.04069	88	46	9	30	0	2	1	0	0	0.1	plate7	91	0.195652
XAV 939	Wnt signaling	3748	2	XAV 939_10uM	-0.378512	0.208587	3748:10uM:plate7	0.972072	87	51	9	25	0	1	1	0	0	10	plate7	85	0.176471
XAV 939	Wnt signaling	3748	2	XAV 939_1uM	-0.70044	0.341037	3748:1uM:plate7	1.06356	88	56	7	23	0	0	0	2	0	1	plate7	93	0.125
Yhhu 3792	Notch signaling	6599	2	Yhhu 3792_0.1uM	-0.115477	0.366128	6599:0.1uM:plate13	0.560371	88	57	11	18	0	0	2	0	0	0.1	plate13	49	0.192982
Yhhu 3792	Notch signaling	6599	2	Yhhu 3792_1uM	0.206451	-0.206451	6599:1uM:plate13	1.06356	88	38	14	31	0	3	2	0	0	1	plate13	93	0.368421
