# Supplementary material for: A multiplexed, single-cell sequencing screen identifies compounds that increase neurogenic reprogramming of murine Muller glia
Source: eLife. 2024 Dec 12;12:RP92091. doi: 10.7554/eLife.92091 (PMC11637464; doi:10.7554/eLife.92091)
Supplement: Figure 2—source data 2. [file elife-92091-fig2-data2.xlsx]

## Sheet: specificity_genes
cell_group	gene_id	gene_short_name	fraction_expressing	mean_expression	specificity
ER_stressed	ENSMUSG00000039518	Cdsn	0.114607	0.224448	0.876528
ER_stressed	ENSMUSG00000004951	Hspb1	0.0921348	1.27303	0.84833
ER_stressed	ENSMUSG00000091971	Hspa1A	0.103371	3.66736	0.806544
ER_stressed	ENSMUSG00000032715	Trib3	0.146067	0.260215	0.788147
ER_stressed	ENSMUSG00000090877	Hspa1B	0.119101	7.71497	0.787457
ER_stressed	ENSMUSG00000038508	Gdf15	0.0719101	0.135511	0.738378
ER_stressed	ENSMUSG00000026483	Fam129A	0.0786517	0.112998	0.617126
ER_stressed	ENSMUSG00000003032	Klf4	0.18427	0.292892	0.572251
ER_stressed	ENSMUSG00000032285	Dnaja4	0.101124	0.448474	0.539415
ER_stressed	ENSMUSG00000005483	Dnajb1	0.188764	1.52703	0.517275
ER_stressed	ENSMUSG00000026628	Atf3	0.177528	0.350221	0.516989
ER_stressed	ENSMUSG00000027313	Chac1	0.18427	0.303231	0.503215
ER_stressed	ENSMUSG00000029752	Asns	0.348315	0.599652	0.500459
ER_stressed	ENSMUSG00000025408	Ddit3	0.303371	0.83896	0.489758
ER_stressed	ENSMUSG00000040618	Pck2	0.206742	0.297366	0.486227
ER_stressed	ENSMUSG00000022144	Gdnf	0.094382	0.116325	0.477118
ER_stressed	ENSMUSG00000026456	Cyb5R1	0.188764	0.218533	0.472817
ER_stressed	ENSMUSG00000025140	Pycr1	0.0561798	0.0592567	0.462405
ER_stressed	ENSMUSG00000029816	Gpnmb	0.391011	2.35496	0.460047
ER_stressed	ENSMUSG00000050335	Lgals3	0.25618	0.769731	0.456224
ER_stressed	ENSMUSG00000021226	Acot2	0.101124	0.126929	0.45212
ER_stressed	ENSMUSG00000005667	Mthfd2	0.195506	0.280614	0.444634
ER_stressed	ENSMUSG00000024912	Fosl1	0.0764045	0.0892607	0.419878
ER_stressed	ENSMUSG00000032849	Abcc4	0.307865	0.52253	0.410332
ER_stressed	ENSMUSG00000042406	Atf4	0.41573	0.728849	0.408232
ER_stressed	ENSMUSG00000038539	Atf5	0.350562	0.670518	0.407104
ER_stressed	ENSMUSG00000041313	Slc7A1	0.346067	0.580924	0.398192
ER_stressed	ENSMUSG00000092035	Peg10	0.197753	0.500478	0.391844
ER_stressed	ENSMUSG00000023951	Vegfa	0.125843	0.165533	0.383108
ER_stressed	ENSMUSG00000032802	Srxn1	0.206742	0.329898	0.37747
ER_stressed	ENSMUSG00000072812	Ahnak2	0.18427	0.292579	0.372403
ER_stressed	ENSMUSG00000040435	Ppp1R15A	0.323596	0.52653	0.372009
ER_stressed	ENSMUSG00000041324	Inhba	0.0719101	0.105217	0.368502
ER_stressed	ENSMUSG00000047407	Tgif1	0.105618	0.117791	0.366863
ER_stressed	ENSMUSG00000031490	Eif4Ebp1	0.314607	0.424665	0.36438
ER_stressed	ENSMUSG00000027737	Slc7A11	0.285393	0.710696	0.361313
ER_stressed	ENSMUSG00000026864	Hspa5	0.8	6.15689	0.355466
ER_stressed	ENSMUSG00000045312	Lhfpl2	0.28764	0.473464	0.35281
ER_stressed	ENSMUSG00000026956	Uap1L1	0.150562	0.230054	0.345742
ER_stressed	ENSMUSG00000005413	Hmox1	0.364045	0.802312	0.344868
ER_stressed	ENSMUSG00000021707	Dhfr	0.0674157	0.176616	0.34247
ER_stressed	ENSMUSG00000024924	Vldlr	0.21573	0.296743	0.339566
ER_stressed	ENSMUSG00000015312	Gadd45B	0.220225	0.441179	0.338788
ER_stressed	ENSMUSG00000037580	Gch1	0.0516854	0.0558075	0.336781
ER_stressed	ENSMUSG00000021831	Ero1L	0.226966	0.340871	0.335825
ER_stressed	ENSMUSG00000025348	Itga7	0.247191	0.41849	0.333337
ER_stressed	ENSMUSG00000029446	Psph	0.155056	0.174338	0.333154
ER_stressed	ENSMUSG00000020256	Aldh1L2	0.296629	0.573899	0.332736
ER_stressed	ENSMUSG00000021270	Hsp90Aa1	0.217978	0.49285	0.330635
ER_stressed	ENSMUSG00000031765	Mt1	0.669663	4.05976	0.327666
ER_stressed	ENSMUSG00000033542	Arhgef5	0.0741573	0.0838734	0.326206
ER_stressed	ENSMUSG00000043415	Otud1	0.0606742	0.0732688	0.325255
ER_stressed	ENSMUSG00000026193	Fn1	0.58427	2.75147	0.324067
ER_stressed	ENSMUSG00000056758	Hmga2	0.11236	0.201098	0.32188
ER_stressed	ENSMUSG00000000278	Scpep1	0.289888	0.460057	0.320034
ER_stressed	ENSMUSG00000029777	Gars	0.355056	0.523739	0.320024
ER_stressed	ENSMUSG00000029657	Hsph1	0.408989	2.01882	0.319498
ER_stressed	ENSMUSG00000037613	Tnfrsf23	0.058427	0.0530231	0.319221
ER_stressed	ENSMUSG00000034667	Xpot	0.280899	0.432385	0.317568
ER_stressed	ENSMUSG00000073676	Hspe1	0.0741573	0.0999341	0.316673
ER_stressed	ENSMUSG00000051316	Taf7	0.0516854	0.0699891	0.315695
ER_stressed	ENSMUSG00000032733	Snx33	0.0831461	0.0974188	0.313753
ER_stressed	ENSMUSG00000031762	Mt2	0.51236	1.91765	0.311224
ER_stressed	ENSMUSG00000024359	Hspa9	0.568539	1.22397	0.310975
ER_stressed	ENSMUSG00000036693	Nop14	0.146067	0.16662	0.308513
ER_stressed	ENSMUSG00000010755	Cars	0.217978	0.262481	0.308378
ER_stressed	ENSMUSG00000060950	Trmt61A	0.0674157	0.0729227	0.307448
ER_stressed	ENSMUSG00000032796	Lama1	0.0719101	0.0805349	0.30651
ER_stressed	ENSMUSG00000077457	Snord65	0.123596	0.132349	0.305724
ER_stressed	ENSMUSG00000024732	Ccdc86	0.148315	0.226324	0.305081
ER_stressed	ENSMUSG00000068699	Flnc	0.197753	0.322821	0.304308
ER_stressed	ENSMUSG00000033149	Phldb2	0.307865	0.526332	0.303314
Immune_reactive	ENSMUSG00000059089	Fcgr4	0.0545455	0.0493739	0.934968
Immune_reactive	ENSMUSG00000032089	Il10Ra	0.0818182	0.109995	0.914353
Immune_reactive	ENSMUSG00000099398	Ms4A14	0.0909091	0.136295	0.892556
Immune_reactive	ENSMUSG00000026358	Rgs1	0.0818182	0.192081	0.87376
Immune_reactive	ENSMUSG00000071714	Csf2Rb2	0.0727273	0.0901281	0.859269
Immune_reactive	ENSMUSG00000073490	Ifi207	0.272727	0.559996	0.854234
Immune_reactive	ENSMUSG00000026656	Fcgr2B	0.0636364	0.11886	0.832173
Immune_reactive	ENSMUSG00000020573	Pik3Cg	0.0636364	0.0645618	0.830363
Immune_reactive	ENSMUSG00000025017	Pik3Ap1	0.281818	0.332312	0.824198
Immune_reactive	ENSMUSG00000030047	Arhgap25	0.0909091	0.134928	0.821895
Immune_reactive	ENSMUSG00000024066	Xdh	0.0545455	0.0617244	0.819643
Immune_reactive	ENSMUSG00000046805	Mpeg1	0.463636	0.79639	0.81702
Immune_reactive	ENSMUSG00000033220	Rac2	0.0727273	0.0786108	0.816261
Immune_reactive	ENSMUSG00000030745	Il21R	0.0545455	0.0837265	0.815408
Immune_reactive	ENSMUSG00000002699	Lcp2	0.0818182	0.0961952	0.81001
Immune_reactive	ENSMUSG00000040552	C3Ar1	0.218182	0.304663	0.808103
Immune_reactive	ENSMUSG00000024621	Csf1R	0.445455	0.798668	0.80482
Immune_reactive	ENSMUSG00000043008	Klhl6	0.0636364	0.0622578	0.802232
Immune_reactive	ENSMUSG00000036905	C1Qb	0.463636	0.973581	0.800417
Immune_reactive	ENSMUSG00000018008	Cyth4	0.163636	0.183613	0.798161
Immune_reactive	ENSMUSG00000036896	C1Qc	0.445455	0.915581	0.798076
Immune_reactive	ENSMUSG00000020709	Adap2	0.163636	0.181341	0.797172
Immune_reactive	ENSMUSG00000026177	Slc11A1	0.1	0.145031	0.796631
Immune_reactive	ENSMUSG00000040528	Milr1	0.0727273	0.0539781	0.793938
Immune_reactive	ENSMUSG00000023349	Clec4N	0.154545	0.169847	0.793576
Immune_reactive	ENSMUSG00000022148	Fyb	0.436364	0.666993	0.792273
Immune_reactive	ENSMUSG00000040747	Cd53	0.154545	0.150125	0.792152
Immune_reactive	ENSMUSG00000024679	Ms4A6D	0.145455	0.150256	0.79095
Immune_reactive	ENSMUSG00000036887	C1Qa	0.436364	1.00544	0.790448
Immune_reactive	ENSMUSG00000051506	Wdfy4	0.0545455	0.132646	0.78824
Immune_reactive	ENSMUSG00000039193	Nlrc4	0.0636364	0.0816736	0.784519
Immune_reactive	ENSMUSG00000030786	Itgam	0.0727273	0.0743015	0.782771
Immune_reactive	ENSMUSG00000048865	Arhgap30	0.0818182	0.0579985	0.782477
Immune_reactive	ENSMUSG00000025804	Ccr1	0.0727273	0.142593	0.781876
Immune_reactive	ENSMUSG00000038642	Ctss	0.418182	0.620293	0.781618
Immune_reactive	ENSMUSG00000023992	Trem2	0.0818182	0.0940255	0.778893
Immune_reactive	ENSMUSG00000034116	Vav1	0.127273	0.113332	0.774931
Immune_reactive	ENSMUSG00000024013	Fgd2	0.0636364	0.0684994	0.774441
Immune_reactive	ENSMUSG00000004609	Cd33	0.1	0.0819309	0.772309
Immune_reactive	ENSMUSG00000070780	Rbm47	0.218182	0.277193	0.770399
Immune_reactive	ENSMUSG00000026288	Inpp5D	0.281818	0.379506	0.770172
Immune_reactive	ENSMUSG00000015396	Cd83	0.0818182	0.0874731	0.767195
Immune_reactive	ENSMUSG00000030579	Tyrobp	0.181818	0.244999	0.760083
Immune_reactive	ENSMUSG00000071713	Csf2Rb	0.0909091	0.101075	0.759715
Immune_reactive	ENSMUSG00000021457	Syk	0.181818	0.20244	0.759121
Immune_reactive	ENSMUSG00000061132	Blnk	0.109091	0.114862	0.751575
Immune_reactive	ENSMUSG00000015852	Fcrls	0.0818182	0.122161	0.74814
Immune_reactive	ENSMUSG00000028581	Laptm5	0.327273	0.586157	0.745698
Immune_reactive	ENSMUSG00000024300	Myo1F	0.163636	0.212386	0.744831
Immune_reactive	ENSMUSG00000024672	Ms4A7	0.245455	0.316421	0.744148
Immune_reactive	ENSMUSG00000112023	Lilr4B	0.1	0.146632	0.741494
Immune_reactive	ENSMUSG00000018381	Abi3	0.0636364	0.0578559	0.74136
Immune_reactive	ENSMUSG00000035697	Arhgap45	0.0909091	0.102811	0.74074
Immune_reactive	ENSMUSG00000036931	Nfkbid	0.0545455	0.0785769	0.739411
Immune_reactive	ENSMUSG00000026395	Ptprc	0.409091	0.584617	0.738158
Immune_reactive	ENSMUSG00000015340	Cybb	0.318182	0.372234	0.737081
Immune_reactive	ENSMUSG00000020143	Dock2	0.318182	0.389081	0.735826
Immune_reactive	ENSMUSG00000018654	Ikzf1	0.118182	0.127118	0.733687
Immune_reactive	ENSMUSG00000038147	Cd84	0.154545	0.163274	0.732749
Immune_reactive	ENSMUSG00000069516	Lyz2	0.509091	1.23466	0.732449
Immune_reactive	ENSMUSG00000026321	Tnfrsf11A	0.118182	0.134162	0.730875
Immune_reactive	ENSMUSG00000101389	Ms4A4A	0.227273	0.269409	0.728819
Immune_reactive	ENSMUSG00000015355	Cd48	0.1	0.0879763	0.72678
Immune_reactive	ENSMUSG00000004730	Adgre1	0.227273	0.259711	0.721534
Immune_reactive	ENSMUSG00000052384	Nrros	0.0545455	0.0810129	0.720383
Immune_reactive	ENSMUSG00000021322	Aoah	0.109091	0.145556	0.719186
Immune_reactive	ENSMUSG00000033777	Tlr13	0.145455	0.16103	0.716732
Immune_reactive	ENSMUSG00000025044	Msr1	0.118182	0.151884	0.716219
Immune_reactive	ENSMUSG00000058715	Fcer1G	0.163636	0.201545	0.716033
Immune_reactive	ENSMUSG00000049744	Arhgap15	0.118182	0.152964	0.715311
Immune_reactive	ENSMUSG00000022831	Hcls1	0.109091	0.137986	0.713635
Immune_reactive	ENSMUSG00000000682	Cd52	0.0545455	0.0311026	0.712591
Immune_reactive	ENSMUSG00000021423	Ly86	0.218182	0.240733	0.710834
Immune_reactive	ENSMUSG00000052085	Dock8	0.154545	0.218949	0.709738
Immune_reactive	ENSMUSG00000059498	Fcgr3	0.136364	0.164775	0.709387
Immune_reactive	ENSMUSG00000042286	Stab1	0.209091	0.260152	0.707149
Immune_reactive	ENSMUSG00000052336	Cx3Cr1	0.436364	0.698035	0.702715
Immune_reactive	ENSMUSG00000024737	Slc15A3	0.145455	0.197229	0.702436
Immune_reactive	ENSMUSG00000020077	Srgn	0.0727273	0.12324	0.697343
Immune_reactive	ENSMUSG00000079419	Ms4A6C	0.109091	0.148152	0.695452
Immune_reactive	ENSMUSG00000022488	Nckap1L	0.136364	0.0988686	0.694701
Immune_reactive	ENSMUSG00000026866	Kynu	0.190909	0.308372	0.691898
Immune_reactive	ENSMUSG00000047250	Ptgs1	0.145455	0.171662	0.688144
Immune_reactive	ENSMUSG00000020865	Abcc3	0.0818182	0.077979	0.688121
Immune_reactive	ENSMUSG00000015950	Ncf1	0.0909091	0.0804291	0.686015
Immune_reactive	ENSMUSG00000052160	Pld4	0.154545	0.160943	0.680103
Immune_reactive	ENSMUSG00000002111	Spi1	0.109091	0.0717896	0.679572
Immune_reactive	ENSMUSG00000044583	Tlr7	0.0545455	0.0276674	0.676522
Immune_reactive	ENSMUSG00000000290	Itgb2	0.1	0.120719	0.675331
Immune_reactive	ENSMUSG00000030220	Arhgdib	0.127273	0.152027	0.669352
Immune_reactive	ENSMUSG00000022901	Cd86	0.109091	0.107241	0.66769
Immune_reactive	ENSMUSG00000029919	Hpgds	0.145455	0.156655	0.662017
Immune_reactive	ENSMUSG00000030793	Pycard	0.0545455	0.0840599	0.661967
Immune_reactive	ENSMUSG00000029299	Abcg3	0.0909091	0.0933049	0.658787
Immune_reactive	ENSMUSG00000029925	Tbxas1	0.209091	0.311307	0.653873
Immune_reactive	ENSMUSG00000030263	Lrmp	0.0636364	0.0647426	0.639854
Immune_reactive	ENSMUSG00000048779	P2Ry6	0.136364	0.205577	0.63778
Immune_reactive	ENSMUSG00000027339	Rassf2	0.0636364	0.0524442	0.627597
Immune_reactive	ENSMUSG00000034438	Gbp8	0.0727273	0.0992535	0.624806
Immune_reactive	ENSMUSG00000024677	Ms4A6B	0.0909091	0.0616737	0.619016
Immune_reactive	ENSMUSG00000026786	Apbb1Ip	0.172727	0.156414	0.618028
Immune_reactive	ENSMUSG00000020901	Pik3R5	0.0545455	0.0498726	0.617671
Immune_reactive	ENSMUSG00000016087	Fli1	0.163636	0.176571	0.601715
Immune_reactive	ENSMUSG00000048120	Entpd1	0.145455	0.114806	0.601607
Immune_reactive	ENSMUSG00000018774	Cd68	0.2	0.272939	0.599135
Immune_reactive	ENSMUSG00000048163	Selplg	0.0636364	0.0535861	0.598527
Immune_reactive	ENSMUSG00000029468	P2Rx7	0.0909091	0.291298	0.592223
Immune_reactive	ENSMUSG00000021108	Prkch	0.1	0.0979056	0.592112
Immune_reactive	ENSMUSG00000055541	Lair1	0.2	0.243672	0.589885
Immune_reactive	ENSMUSG00000036908	Unc93B1	0.263636	0.322558	0.588646
Immune_reactive	ENSMUSG00000029217	Tec	0.163636	0.213866	0.587407
Immune_reactive	ENSMUSG00000063458	Lrmda	0.609091	1.71494	0.583921
Immune_reactive	ENSMUSG00000023913	Pla2G7	0.0636364	0.0622686	0.577677
Immune_reactive	ENSMUSG00000034255	Arhgap27	0.0727273	0.102074	0.571093
Immune_reactive	ENSMUSG00000024965	Fermt3	0.0909091	0.0955705	0.567077
Immune_reactive	ENSMUSG00000032750	Gab3	0.118182	0.275923	0.564772
Immune_reactive	ENSMUSG00000030789	Itgax	0.0727273	0.0585423	0.560927
Immune_reactive	ENSMUSG00000021998	Lcp1	0.227273	0.265478	0.560327
Immune_reactive	ENSMUSG00000021624	Cd180	0.227273	0.279122	0.556404
Immune_reactive	ENSMUSG00000035004	Igsf6	0.0545455	0.0439763	0.551842
Immune_reactive	ENSMUSG00000042228	Lyn	0.518182	0.835555	0.525638
Immune_reactive	ENSMUSG00000003283	Hck	0.118182	0.154064	0.524008
Immune_reactive	ENSMUSG00000029771	Irf5	0.0818182	0.090712	0.520974
Immune_reactive	ENSMUSG00000015568	Lpl	0.118182	0.179475	0.515235
Immune_reactive	ENSMUSG00000041515	Irf8	0.0818182	0.0515682	0.506536
Immune_reactive	ENSMUSG00000053004	Hrh1	0.0545455	0.0692139	0.494291
Immune_reactive	ENSMUSG00000029553	Tfec	0.0545455	0.0505672	0.486842
Immune_reactive	ENSMUSG00000041992	Rapgef5	0.154545	0.122162	0.486024
Immune_reactive	ENSMUSG00000031216	Stard8	0.0818182	0.129083	0.477898
Immune_reactive	ENSMUSG00000029304	Spp1	0.245455	0.299831	0.476019
Immune_reactive	ENSMUSG00000005583	Mef2C	0.209091	0.353172	0.475435
Immune_reactive	ENSMUSG00000019838	Slc16A10	0.0909091	0.103503	0.475219
Immune_reactive	ENSMUSG00000020101	Vsir	0.154545	0.140992	0.475014
Immune_reactive	ENSMUSG00000008496	Pou2F2	0.118182	0.109834	0.462442
Immune_reactive	ENSMUSG00000035493	Tgfbi	0.136364	0.132173	0.445261
Immune_reactive	ENSMUSG00000037860	Aim2	0.0636364	0.0561582	0.442705
Immune_reactive	ENSMUSG00000025993	Slc40A1	0.0909091	0.121371	0.442638
Immune_reactive	ENSMUSG00000022150	Dab2	0.154545	0.161237	0.441988
Immune_reactive	ENSMUSG00000018920	Cxcl16	0.0636364	0.0670478	0.439379
Immune_reactive	ENSMUSG00000074622	Mafb	0.127273	0.102848	0.433238
Immune_reactive	ENSMUSG00000032122	Slc37A2	0.136364	0.184667	0.432623
Immune_reactive	ENSMUSG00000064373	Selenop	0.454545	0.716604	0.430406
Immune_reactive	ENSMUSG00000004266	Ptpn6	0.0636364	0.0579661	0.427504
Immune_reactive	ENSMUSG00000040613	Apobec1	0.227273	0.294322	0.42309
Immune_reactive	ENSMUSG00000030844	Rgs10	0.0818182	0.104173	0.419509
Immune_reactive	ENSMUSG00000038807	Rap1Gap2	0.0909091	0.143424	0.406847
Immune_reactive	ENSMUSG00000035158	Mitf	0.418182	0.788015	0.397281
Immune_reactive	ENSMUSG00000001123	Lgals9	0.0636364	0.0501329	0.396479
Immune_reactive	ENSMUSG00000026029	Casp8	0.0818182	0.104237	0.391871
Immune_reactive	ENSMUSG00000053985	Zfp14	0.0909091	0.235296	0.390598
Immune_reactive	ENSMUSG00000042349	Ikbke	0.0636364	0.0999344	0.389779
Immune_reactive	ENSMUSG00000020120	Plek	0.163636	0.220341	0.381193
Immune_reactive	ENSMUSG00000021190	Lgmn	0.445455	0.707743	0.377944
Immune_reactive	ENSMUSG00000056592	Zfp658	0.0545455	0.0720769	0.373311
Immune_reactive	ENSMUSG00000042770	Hebp1	0.0818182	0.0996406	0.371411
Immune_reactive	ENSMUSG00000052981	Ube2Ql1	0.0545455	0.0941109	0.371073
Immune_reactive	ENSMUSG00000037946	Fgd3	0.0727273	0.112546	0.370058
Immune_reactive	ENSMUSG00000001750	Tcirg1	0.109091	0.0930637	0.367722
Immune_reactive	ENSMUSG00000026365	Cfh	0.109091	0.119936	0.367582
Immune_reactive	ENSMUSG00000052889	Prkcb	0.281818	0.420724	0.364818
Immune_reactive	ENSMUSG00000024696	Lpxn	0.0545455	0.0861229	0.362739
Immune_reactive	ENSMUSG00000022969	Il10Rb	0.0636364	0.043198	0.359639
Immune_reactive	ENSMUSG00000091119	Ccdc152	0.118182	0.12331	0.359444
Immune_reactive	ENSMUSG00000045404	Kcnk13	0.127273	0.137931	0.358753
Immune_reactive	ENSMUSG00000017631	Abr	0.336364	0.503586	0.356605
Immune_reactive	ENSMUSG00000040710	St8Sia4	0.127273	0.181665	0.35535
Immune_reactive	ENSMUSG00000062210	Tnfaip8	0.118182	0.160121	0.353732
Immune_reactive	ENSMUSG00000036863	Syde2	0.0545455	0.0765724	0.352997
Immune_reactive	ENSMUSG00000008136	Fhl2	0.0818182	0.199137	0.351577
Immune_reactive	ENSMUSG00000038910	Plcl2	0.136364	0.137692	0.351546
Immune_reactive	ENSMUSG00000022529	Zfp263	0.145455	0.487131	0.350844
Immune_reactive	ENSMUSG00000024824	Rad9A	0.0636364	0.112183	0.347883
Immune_reactive	ENSMUSG00000036353	P2Ry12	0.0818182	0.100631	0.346759
Immune_reactive	ENSMUSG00000033233	Trim45	0.0545455	0.0421468	0.346458
Immune_reactive	ENSMUSG00000032744	Heyl	0.181818	0.495117	0.344577
Immune_reactive	ENSMUSG00000033192	Lpcat2	0.209091	0.307399	0.343306
Immune_reactive	ENSMUSG00000020828	Pld2	0.0545455	0.0775662	0.342822
Immune_reactive	ENSMUSG00000029814	Igf2Bp3	0.109091	0.105294	0.339636
Immune_reactive	ENSMUSG00000039005	Tlr4	0.0545455	0.0318523	0.339285
Immune_reactive	ENSMUSG00000033740	St18	0.190909	0.297212	0.335729
Immune_reactive	ENSMUSG00000036246	Gmip	0.0818182	0.0950846	0.335703
Immune_reactive	ENSMUSG00000042594	Sh2B3	0.0727273	0.144382	0.334506
Immune_reactive	ENSMUSG00000059456	Ptk2B	0.172727	0.243473	0.333554
Immune_reactive	ENSMUSG00000094962	Gm21954	0.0818182	0.233327	0.332359
Immune_reactive	ENSMUSG00000025314	Ptprj	0.490909	0.92068	0.331626
Immune_reactive	ENSMUSG00000030748	Il4Ra	0.109091	0.115255	0.331033
Immune_reactive	ENSMUSG00000032440	Tgfbr2	0.354545	0.651384	0.330545
Immune_reactive	ENSMUSG00000029557	Mrm2	0.0545455	0.0649642	0.330138
Immune_reactive	ENSMUSG00000026110	Mgat4A	0.136364	0.164927	0.327841
Immune_reactive	ENSMUSG00000024907	Gal	0.127273	0.994603	0.326424
Immune_reactive	ENSMUSG00000034445	Cyb561A3	0.0727273	0.082245	0.323589
Immune_reactive	ENSMUSG00000049038	Mterf2	0.0545455	0.128941	0.321255
Immune_reactive	ENSMUSG00000021947	Cryl1	0.0818182	0.0788839	0.319781
Immune_reactive	ENSMUSG00000030208	Emp1	0.0727273	0.0784216	0.319729
Immune_reactive	ENSMUSG00000038515	Grtp1	0.0909091	0.248199	0.319482
Immune_reactive	ENSMUSG00000038608	Dock10	0.254545	0.359727	0.317532
Immune_reactive	ENSMUSG00000028599	Tnfrsf1B	0.127273	0.19235	0.315559
Immune_reactive	ENSMUSG00000037902	Sirpa	0.245455	0.303733	0.314336
Immune_reactive	ENSMUSG00000024663	Rab3Il1	0.0545455	0.0382555	0.312136
Immune_reactive	ENSMUSG00000007379	Dennd2C	0.0636364	0.0735134	0.311848
Immune_reactive	ENSMUSG00000036833	Pnpla7	0.172727	0.175346	0.309722
Immune_reactive	ENSMUSG00000006519	Cyba	0.0909091	0.114063	0.309637
Immune_reactive	ENSMUSG00000021948	Prkcd	0.163636	0.146389	0.306746
Immune_reactive	ENSMUSG00000052688	Rab7B	0.0727273	0.0958923	0.306536
Immune_reactive	ENSMUSG00000037295	Ldlrap1	0.0545455	0.0512817	0.305091
Immune_reactive	ENSMUSG00000031903	Pla2G15	0.1	0.117658	0.303121
Immune_reactive	ENSMUSG00000032359	Ctsh	0.118182	0.138996	0.302055
Immune_reactive	ENSMUSG00000061119	Prcp	0.0545455	0.0942595	0.300943
Immune_reactive	ENSMUSG00000059326	Csf2Ra	0.1	0.146421	0.300742
Immune_reactive	ENSMUSG00000039458	Mtmr12	0.154545	0.280339	0.300641
Undefined_neuron	ENSMUSG00000025597	Klhl4	0.101351	0.175891	0.867966
Undefined_neuron	ENSMUSG00000005917	Otx1	0.168919	0.251768	0.824166
Undefined_neuron	ENSMUSG00000050321	Neto1	0.209459	0.609558	0.779382
Undefined_neuron	ENSMUSG00000005640	Insrr	0.0608108	0.13868	0.774938
Undefined_neuron	ENSMUSG00000009734	Pou6F2	0.0608108	0.321128	0.76669
Undefined_neuron	ENSMUSG00000096914	Galntl6	0.337838	0.988763	0.746632
Undefined_neuron	ENSMUSG00000032452	Clstn2	0.756757	8.03112	0.735992
Undefined_neuron	ENSMUSG00000049176	Frmpd4	0.628378	2.09904	0.730231
Undefined_neuron	ENSMUSG00000020660	Pomc	0.155405	1.23108	0.727738
Undefined_neuron	ENSMUSG00000025754	Agbl1	0.121622	0.297592	0.711887
Undefined_neuron	ENSMUSG00000049538	Adamts16	0.317568	1.24635	0.710515
Undefined_neuron	ENSMUSG00000031465	Angpt2	0.0675676	0.137725	0.704732
Undefined_neuron	ENSMUSG00000049148	Plcxd3	0.0743243	0.101156	0.693581
Undefined_neuron	ENSMUSG00000030518	Fam189A1	0.378378	1.29074	0.67718
Undefined_neuron	ENSMUSG00000047793	Sned1	0.337838	1.23844	0.672632
Undefined_neuron	ENSMUSG00000047591	Mafa	0.0878378	0.127933	0.661849
Undefined_neuron	ENSMUSG00000043301	Kcnj6	0.182432	0.547735	0.660078
Undefined_neuron	ENSMUSG00000014813	Stc1	0.0743243	0.114437	0.650841
Undefined_neuron	ENSMUSG00000017724	Etv4	0.0675676	0.0861345	0.647279
Undefined_neuron	ENSMUSG00000026787	Gad2	0.202703	0.439244	0.643717
Undefined_neuron	ENSMUSG00000008999	Bmp7	0.222973	0.382253	0.642863
Undefined_neuron	ENSMUSG00000010311	Optc	0.0945946	0.114731	0.641398
Undefined_neuron	ENSMUSG00000030209	Grin2B	0.195946	0.404459	0.631275
Undefined_neuron	ENSMUSG00000027684	Mecom	0.344595	0.773089	0.628812
Undefined_neuron	ENSMUSG00000058153	Sez6L	0.162162	0.342685	0.626096
Undefined_neuron	ENSMUSG00000036585	Fgf1	0.155405	0.277247	0.616064
Undefined_neuron	ENSMUSG00000063239	Grm4	0.189189	0.394369	0.615547
Undefined_neuron	ENSMUSG00000028222	Calb1	0.162162	0.329485	0.603201
Undefined_neuron	ENSMUSG00000029608	Rph3A	0.0810811	0.169888	0.599988
Undefined_neuron	ENSMUSG00000028434	Epb41L4B	0.547297	1.37564	0.591789
Undefined_neuron	ENSMUSG00000055254	Ntrk2	0.743243	2.15772	0.585593
Undefined_neuron	ENSMUSG00000020042	Btbd11	0.722973	2.85166	0.577019
Undefined_neuron	ENSMUSG00000041592	Sdk2	0.459459	1.34601	0.576877
Undefined_neuron	ENSMUSG00000037681	Esyt3	0.310811	0.537721	0.573937
Undefined_neuron	ENSMUSG00000004347	Pde1C	0.777027	5.64366	0.56482
Undefined_neuron	ENSMUSG00000046447	Camk2N1	0.493243	1.80876	0.560879
Undefined_neuron	ENSMUSG00000055184	Fam72A	0.054054	0.0805439	0.557736
Undefined_neuron	ENSMUSG00000036972	Zic4	0.0743243	0.108038	0.552206
Undefined_neuron	ENSMUSG00000015090	Ptgds	0.324324	1.09869	0.55171
Undefined_neuron	ENSMUSG00000025932	Eya1	0.27027	0.435469	0.550191
Undefined_neuron	ENSMUSG00000031285	Dcx	0.324324	0.942445	0.549167
Undefined_neuron	ENSMUSG00000022425	Enpp2	0.054054	0.0715627	0.542462
Undefined_neuron	ENSMUSG00000060402	Chst8	0.209459	0.488511	0.537703
Undefined_neuron	ENSMUSG00000027748	Trpc4	0.0743243	0.114212	0.525184
Undefined_neuron	ENSMUSG00000118193	Arhgap26	0.439189	0.952567	0.523321
Undefined_neuron	ENSMUSG00000027827	Kcnab1	0.27027	0.735151	0.515339
Undefined_neuron	ENSMUSG00000038665	Dgki	0.452703	1.54681	0.511743
Undefined_neuron	ENSMUSG00000000794	Kcnn3	0.324324	0.847935	0.502341
Undefined_neuron	ENSMUSG00000050272	Dscam	0.533784	1.79891	0.501891
Undefined_neuron	ENSMUSG00000022686	B3Gnt5	0.0945946	0.128726	0.493667
Undefined_neuron	ENSMUSG00000061576	Dpp6	0.621622	2.82272	0.491868
Undefined_neuron	ENSMUSG00000075324	Fign	0.25	0.425574	0.484497
Undefined_neuron	ENSMUSG00000032368	Zic1	0.297297	0.486718	0.483458
Undefined_neuron	ENSMUSG00000041205	Map6D1	0.054054	0.0834189	0.481569
Undefined_neuron	ENSMUSG00000043259	Fam13C	0.385135	0.830359	0.480586
Undefined_neuron	ENSMUSG00000071547	Nt5Dc2	0.168919	0.294714	0.47783
Undefined_neuron	ENSMUSG00000027971	Ndst4	0.121622	0.205124	0.47689
Undefined_neuron	ENSMUSG00000044447	Dock5	0.25	0.582982	0.469643
Undefined_neuron	ENSMUSG00000067028	Cntnap5B	0.0810811	0.139009	0.466072
Undefined_neuron	ENSMUSG00000050640	Tmem150C	0.0675676	0.0920449	0.463978
Undefined_neuron	ENSMUSG00000079056	Kcnip3	0.0810811	0.160941	0.460458
Undefined_neuron	ENSMUSG00000021194	Chga	0.452703	1.54137	0.459446
Undefined_neuron	ENSMUSG00000026347	Tmem163	0.135135	0.201254	0.457034
Undefined_neuron	ENSMUSG00000003436	Dll3	0.135135	0.248647	0.45655
Undefined_neuron	ENSMUSG00000041141	Pnmal1	0.0945946	0.124015	0.455218
Undefined_neuron	ENSMUSG00000034177	Rnf43	0.0608108	0.0502931	0.453056
Undefined_neuron	ENSMUSG00000059336	Slc14A1	0.195946	0.441372	0.452574
Undefined_neuron	ENSMUSG00000027977	Ndst3	0.162162	0.330217	0.451736
Undefined_neuron	ENSMUSG00000049303	Syt12	0.189189	0.280217	0.449564
Undefined_neuron	ENSMUSG00000003279	Dlgap1	0.614865	1.76677	0.445016
Undefined_neuron	ENSMUSG00000049044	Rapgef4	0.054054	0.0935996	0.441119
Undefined_neuron	ENSMUSG00000027570	Col9A3	0.459459	1.12997	0.440317
Undefined_neuron	ENSMUSG00000022376	Adcy8	0.459459	1.33049	0.43888
Undefined_neuron	ENSMUSG00000037428	Vgf	0.162162	0.385821	0.438551
Undefined_neuron	ENSMUSG00000039579	Grin3A	0.25	0.597955	0.438095
Undefined_neuron	ENSMUSG00000031239	Itm2A	0.52027	2.15044	0.436873
Undefined_neuron	ENSMUSG00000045967	Gpr158	0.297297	0.498781	0.436689
Undefined_neuron	ENSMUSG00000029838	Ptn	0.47973	0.939613	0.43163
Undefined_neuron	ENSMUSG00000059810	Rgs3	0.135135	0.180184	0.43053
Undefined_neuron	ENSMUSG00000027330	Cdc25B	0.0675676	0.0980341	0.429532
Undefined_neuron	ENSMUSG00000054162	Spock3	0.222973	0.294836	0.428812
Undefined_neuron	ENSMUSG00000041703	Zic5	0.148649	0.23695	0.428104
Undefined_neuron	ENSMUSG00000050541	Adra1B	0.0608108	0.105926	0.426818
Undefined_neuron	ENSMUSG00000019852	Arfgef3	0.466216	1.20464	0.426301
Undefined_neuron	ENSMUSG00000037843	Vstm2L	0.054054	0.0620183	0.424736
Undefined_neuron	ENSMUSG00000024427	Spry4	0.114865	0.166966	0.421784
Undefined_neuron	ENSMUSG00000060924	Csmd1	0.493243	2.43106	0.420641
Undefined_neuron	ENSMUSG00000033377	Palmd	0.155405	0.308567	0.420598
Undefined_neuron	ENSMUSG00000029206	Nsun7	0.0675676	0.104014	0.419311
Undefined_neuron	ENSMUSG00000040875	Osbpl10	0.162162	0.262882	0.417567
Undefined_neuron	ENSMUSG00000004151	Etv1	0.243243	0.303866	0.415446
Undefined_neuron	ENSMUSG00000043843	Tmem145	0.054054	0.0726533	0.414609
Undefined_neuron	ENSMUSG00000026640	Plxna2	0.682432	2.42257	0.413578
Undefined_neuron	ENSMUSG00000026825	Dnm1	0.0878378	0.162992	0.413183
Undefined_neuron	ENSMUSG00000031837	Necab2	0.189189	0.290391	0.412367
Undefined_neuron	ENSMUSG00000029359	Tesc	0.121622	0.145705	0.412134
Undefined_neuron	ENSMUSG00000045441	Gprin3	0.114865	0.190253	0.410748
Undefined_neuron	ENSMUSG00000036815	Dpp10	0.0608108	0.114866	0.405656
Undefined_neuron	ENSMUSG00000059991	Nptx2	0.054054	0.0466004	0.40555
Undefined_neuron	ENSMUSG00000027350	Chgb	0.621622	2.01957	0.405453
Undefined_neuron	ENSMUSG00000003411	Rab3B	0.182432	0.25273	0.405354
Undefined_neuron	ENSMUSG00000049252	Lrp1B	0.344595	1.19313	0.405038
Undefined_neuron	ENSMUSG00000047495	Dlgap2	0.0810811	0.206986	0.403743
Undefined_neuron	ENSMUSG00000061524	Zic2	0.385135	0.7134	0.401386
Undefined_neuron	ENSMUSG00000051401	Kctd16	0.0608108	0.133098	0.400907
Undefined_neuron	ENSMUSG00000029093	Sorcs2	0.290541	0.498507	0.398864
Undefined_neuron	ENSMUSG00000039717	Ralyl	0.668919	3.47941	0.396099
Undefined_neuron	ENSMUSG00000068735	Trp53I11	0.297297	0.502643	0.395945
Undefined_neuron	ENSMUSG00000032303	Chrna3	0.114865	0.178485	0.394156
Undefined_neuron	ENSMUSG00000001995	Sipa1L2	0.277027	0.538398	0.392169
Undefined_neuron	ENSMUSG00000020672	Sntg2	0.0675676	0.0819607	0.39212
Undefined_neuron	ENSMUSG00000046768	Rhoj	0.371622	0.909717	0.391685
Undefined_neuron	ENSMUSG00000079055	Slc8A3	0.22973	0.60349	0.390162
Undefined_neuron	ENSMUSG00000059325	Hopx	0.290541	0.684253	0.389357
Undefined_neuron	ENSMUSG00000028351	Brinp1	0.439189	1.05349	0.388542
Undefined_neuron	ENSMUSG00000044117	Bmerb1	0.486486	1.13761	0.387364
Undefined_neuron	ENSMUSG00000058248	Kcnh1	0.317568	0.810087	0.385494
Undefined_neuron	ENSMUSG00000042807	Hecw2	0.148649	0.263025	0.384674
Undefined_neuron	ENSMUSG00000059203	Il1Rapl2	0.101351	0.180547	0.384648
Undefined_neuron	ENSMUSG00000024873	Cnih2	0.0743243	0.12545	0.382673
Undefined_neuron	ENSMUSG00000022687	Boc	0.0878378	0.15025	0.375536
Undefined_neuron	ENSMUSG00000037847	Nmrk1	0.0945946	0.152411	0.375145
Undefined_neuron	ENSMUSG00000000305	Cdh4	0.371622	0.830237	0.37168
Undefined_neuron	ENSMUSG00000031027	Stk33	0.0878378	0.132459	0.370974
Undefined_neuron	ENSMUSG00000047261	Gap43	0.182432	0.312798	0.369856
Undefined_neuron	ENSMUSG00000021596	Mctp1	0.121622	0.24779	0.369361
Undefined_neuron	ENSMUSG00000026425	Srgap2	0.662162	3.73611	0.368878
Undefined_neuron	ENSMUSG00000043857	Mgat5B	0.0743243	0.164002	0.366315
Undefined_neuron	ENSMUSG00000030657	Xylt1	0.162162	0.374651	0.366233
Undefined_neuron	ENSMUSG00000050840	Cdh20	0.763514	5.14946	0.363872
Undefined_neuron	ENSMUSG00000039419	Cntnap2	0.277027	0.814841	0.358708
Undefined_neuron	ENSMUSG00000027276	Jag1	0.0743243	0.119694	0.357285
Undefined_neuron	ENSMUSG00000019146	Cacng2	0.0878378	0.166254	0.357134
Undefined_neuron	ENSMUSG00000019960	Dusp6	0.209459	0.42673	0.357071
Undefined_neuron	ENSMUSG00000074505	Fat3	0.243243	0.49706	0.354706
Undefined_neuron	ENSMUSG00000025422	Agap2	0.121622	0.171305	0.354667
Undefined_neuron	ENSMUSG00000044365	Cxxc4	0.135135	0.206694	0.353829
Undefined_neuron	ENSMUSG00000021091	Serpina3N	0.0945946	0.388706	0.352978
Undefined_neuron	ENSMUSG00000043051	Disc1	0.101351	0.112438	0.351283
Undefined_neuron	ENSMUSG00000053007	Creb5	0.371622	1.04677	0.350578
Undefined_neuron	ENSMUSG00000019982	Myb	0.135135	0.194053	0.348814
Undefined_neuron	ENSMUSG00000018263	Tbx5	0.0743243	0.150605	0.348564
Undefined_neuron	ENSMUSG00000028176	Lrrc7	0.614865	1.69334	0.347159
Undefined_neuron	ENSMUSG00000060572	Mfap2	0.27027	0.42777	0.34679
Undefined_neuron	ENSMUSG00000057777	Mab21L2	0.371622	0.682782	0.346249
Undefined_neuron	ENSMUSG00000032289	Thsd4	0.310811	1.0989	0.346045
Undefined_neuron	ENSMUSG00000021130	Galnt16	0.135135	0.20727	0.344738
Undefined_neuron	ENSMUSG00000039809	Gabbr2	0.277027	0.547029	0.344374
Undefined_neuron	ENSMUSG00000027674	Pex5L	0.263514	0.386142	0.342261
Undefined_neuron	ENSMUSG00000069227	Gprin1	0.175676	0.267713	0.341118
Undefined_neuron	ENSMUSG00000032503	Arpp21	0.101351	0.180822	0.33969
Undefined_neuron	ENSMUSG00000056752	Dnah9	0.101351	0.119498	0.339548
Undefined_neuron	ENSMUSG00000046500	Tafa4	0.054054	0.173976	0.336908
Undefined_neuron	ENSMUSG00000029563	Foxp2	0.114865	0.182779	0.336868
Undefined_neuron	ENSMUSG00000010066	Cacna2D2	0.101351	0.143379	0.335661
Undefined_neuron	ENSMUSG00000001870	Ltbp1	0.222973	0.550469	0.335432
Undefined_neuron	ENSMUSG00000051323	Pcdh19	0.175676	0.27013	0.333875
Undefined_neuron	ENSMUSG00000036913	Trim67	0.0945946	0.131573	0.332813
Undefined_neuron	ENSMUSG00000007944	Ttc9B	0.0810811	0.0928163	0.332164
Undefined_neuron	ENSMUSG00000020695	Mrc2	0.209459	0.321507	0.331828
Undefined_neuron	ENSMUSG00000045083	Lingo2	0.135135	0.175173	0.331011
Undefined_neuron	ENSMUSG00000059554	Ccdc28A	0.0675676	0.11728	0.330487
Undefined_neuron	ENSMUSG00000026586	Prrx1	0.0675676	0.0990245	0.330084
Undefined_neuron	ENSMUSG00000042256	Ptchd4	0.195946	0.360758	0.328113
Undefined_neuron	ENSMUSG00000061143	Maml3	0.601351	1.83033	0.328042
Undefined_neuron	ENSMUSG00000004633	Chn2	0.472973	1.17825	0.327971
Undefined_neuron	ENSMUSG00000038738	Shank1	0.101351	0.121353	0.327579
Undefined_neuron	ENSMUSG00000020638	Cmpk2	0.054054	0.0560794	0.326927
Undefined_neuron	ENSMUSG00000026576	Atp1B1	0.195946	0.271269	0.326733
Undefined_neuron	ENSMUSG00000026959	Grin1	0.0945946	0.138689	0.326634
Undefined_neuron	ENSMUSG00000023827	Agpat4	0.297297	0.418057	0.326004
Undefined_neuron	ENSMUSG00000067629	Syngap1	0.0743243	0.0745942	0.325334
Undefined_neuron	ENSMUSG00000025795	Rassf3	0.0743243	0.11837	0.323839
Undefined_neuron	ENSMUSG00000027612	Mmp24	0.175676	0.238861	0.322607
Undefined_neuron	ENSMUSG00000000632	Sez6	0.114865	0.149874	0.321992
Undefined_neuron	ENSMUSG00000039385	Cdh6	0.128378	0.181298	0.321872
Undefined_neuron	ENSMUSG00000070469	Adamtsl3	0.0608108	0.0860889	0.32172
Undefined_neuron	ENSMUSG00000020658	Efr3B	0.121622	0.185053	0.320215
Undefined_neuron	ENSMUSG00000033055	Ankrd54	0.0878378	0.113687	0.320103
Undefined_neuron	ENSMUSG00000045102	Poln	0.0810811	0.114704	0.31914
Undefined_neuron	ENSMUSG00000096054	Syne1	0.574324	1.86787	0.318885
Undefined_neuron	ENSMUSG00000022762	Ncam2	0.22973	0.544224	0.318624
Undefined_neuron	ENSMUSG00000021136	Smoc1	0.148649	0.165178	0.318573
Undefined_neuron	ENSMUSG00000000197	Nalcn	0.283784	0.509161	0.318484
Undefined_neuron	ENSMUSG00000041078	Grid1	0.391892	0.840419	0.317237
Undefined_neuron	ENSMUSG00000027358	Bmp2	0.222973	0.533061	0.316477
Undefined_neuron	ENSMUSG00000042671	Rgs8	0.121622	0.203713	0.316357
Undefined_neuron	ENSMUSG00000047557	Lxn	0.222973	0.665511	0.315994
Undefined_neuron	ENSMUSG00000033768	Nrxn2	0.425676	0.82455	0.315684
Undefined_neuron	ENSMUSG00000060534	Dcc	0.533784	4.26959	0.31556
Undefined_neuron	ENSMUSG00000030683	Sez6L2	0.209459	0.371796	0.315074
Undefined_neuron	ENSMUSG00000057378	Ryr3	0.0743243	0.110361	0.314906
Undefined_neuron	ENSMUSG00000027520	Zdbf2	0.114865	0.160971	0.311762
Undefined_neuron	ENSMUSG00000039372	44989	0.0675676	0.124999	0.311754
Undefined_neuron	ENSMUSG00000028909	Ptpru	0.0608108	0.0867472	0.311288
Undefined_neuron	ENSMUSG00000044674	Fzd1	0.168919	0.310538	0.310476
Undefined_neuron	ENSMUSG00000027200	Sema6D	0.121622	0.245407	0.310392
Undefined_neuron	ENSMUSG00000021313	Ryr2	0.222973	0.586762	0.309188
Undefined_neuron	ENSMUSG00000058975	Kcnc1	0.324324	0.539499	0.308953
Undefined_neuron	ENSMUSG00000015968	Cacna1D	0.486486	1.1792	0.307945
Undefined_neuron	ENSMUSG00000022269	44996	0.0675676	0.101227	0.307842
Undefined_neuron	ENSMUSG00000028637	Ccdc30	0.0743243	0.111833	0.307698
Undefined_neuron	ENSMUSG00000042453	Reln	0.533784	1.59472	0.307493
Undefined_neuron	ENSMUSG00000037224	Zfyve28	0.162162	0.216456	0.306499
Undefined_neuron	ENSMUSG00000023017	Asic1	0.0743243	0.120181	0.306333
Undefined_neuron	ENSMUSG00000031093	Dock11	0.135135	0.204188	0.305442
Undefined_neuron	ENSMUSG00000042182	Bend6	0.0608108	0.105573	0.305267
Undefined_neuron	ENSMUSG00000037709	Fam13A	0.121622	0.184637	0.304694
Undefined_neuron	ENSMUSG00000028883	Sema3A	0.054054	0.0873769	0.303494
Undefined_neuron	ENSMUSG00000041609	Bicdl1	0.27027	0.37735	0.303398
Undefined_neuron	ENSMUSG00000063600	Egfem1	0.195946	0.473225	0.3027
Undefined_neuron	ENSMUSG00000041343	Ankrd42	0.054054	0.107226	0.301652
Undefined_neuron	ENSMUSG00000039546	Ajap1	0.0878378	0.169558	0.300989
Undefined_neuron	ENSMUSG00000038836	Agbl3	0.0878378	0.15683	0.300848
Undefined_neuron	ENSMUSG00000038576	Susd4	0.0743243	0.0998616	0.300538
Unknown	ENSMUSG00000073421	H2-Ab1	0.0934066	0.0683198	0.626069
Unknown	ENSMUSG00000000792	Slc5A5	0.107143	0.12624	0.625431
Unknown	ENSMUSG00000023484	Prph	0.0549451	0.0963548	0.549056
Unknown	ENSMUSG00000004892	Bcan	0.0906593	0.083828	0.547545
Unknown	ENSMUSG00000009628	Tex15	0.0879121	0.0987726	0.539463
Unknown	ENSMUSG00000025780	Itih5	0.0961538	0.0800124	0.525532
Unknown	ENSMUSG00000019851	Perp	0.126374	0.149034	0.52273
Unknown	ENSMUSG00000075316	Scn9A	0.0549451	0.0532655	0.519466
Unknown	ENSMUSG00000026399	Cd55	0.0906593	0.106876	0.506144
Unknown	ENSMUSG00000009876	Cox4I2	0.142857	0.120296	0.474405
Unknown	ENSMUSG00000038932	Tcfl5	0.107143	0.125075	0.469393
Unknown	ENSMUSG00000036395	Glb1L2	0.0796703	0.0632798	0.467595
Unknown	ENSMUSG00000062296	Trank1	0.0714286	0.0603658	0.454944
Unknown	ENSMUSG00000032135	Mcam	0.0769231	0.0747004	0.448893
Unknown	ENSMUSG00000051811	Cox6B2	0.181319	0.219271	0.422206
Unknown	ENSMUSG00000035681	Kcnc2	0.0796703	0.0872871	0.414456
Unknown	ENSMUSG00000062393	Dgkk	0.0659341	0.0699766	0.409662
Unknown	ENSMUSG00000048988	Elfn1	0.0521978	0.0459081	0.409156
Unknown	ENSMUSG00000021696	Elovl7	0.0521978	0.0387524	0.403113
Unknown	ENSMUSG00000038146	Notch3	0.0604396	0.046937	0.401719
Unknown	ENSMUSG00000046718	Bst2	0.0631868	0.0546229	0.401288
Unknown	ENSMUSG00000056258	Kcnq3	0.0824176	0.113375	0.399668
Unknown	ENSMUSG00000056427	Slit3	0.0989011	0.124632	0.394646
Unknown	ENSMUSG00000055540	Epha6	0.0851648	0.100283	0.393697
Unknown	ENSMUSG00000028039	Efna3	0.0824176	0.0723741	0.388925
Unknown	ENSMUSG00000032511	Scn5A	0.225275	0.305131	0.382824
Unknown	ENSMUSG00000058420	Syt17	0.10989	0.105739	0.380705
Unknown	ENSMUSG00000037405	Icam1	0.0906593	0.0751164	0.378895
Unknown	ENSMUSG00000029212	Gabrb1	0.120879	0.135209	0.377743
Unknown	ENSMUSG00000047428	Dlk2	0.0796703	0.0659116	0.372211
Unknown	ENSMUSG00000050050	Ccdc158	0.0686813	0.0434237	0.371534
Unknown	ENSMUSG00000061298	Agbl4	0.288462	0.327933	0.369122
Unknown	ENSMUSG00000055653	Gpc3	0.0686813	0.0573364	0.368775
Unknown	ENSMUSG00000039457	Ppl	0.0686813	0.0613651	0.366993
Unknown	ENSMUSG00000069743	Zfp820	0.0521978	0.0467287	0.362181
Unknown	ENSMUSG00000059895	Ptp4A3	0.162088	0.19574	0.361643
Unknown	ENSMUSG00000053702	Nebl	0.417582	0.591822	0.358977
Unknown	ENSMUSG00000049281	Scn3B	0.0631868	0.0638145	0.355525
Unknown	ENSMUSG00000000296	Tpd52L1	0.0659341	0.0584351	0.350472
Unknown	ENSMUSG00000050390	C77080	0.0714286	0.0729932	0.349608
Unknown	ENSMUSG00000052151	Plpp2	0.0714286	0.0660442	0.347438
Unknown	ENSMUSG00000044934	Zfp367	0.0659341	0.0685823	0.343838
Unknown	ENSMUSG00000035547	Capn5	0.10989	0.111166	0.340807
Unknown	ENSMUSG00000047344	Lancl3	0.0769231	0.0548032	0.340746
Unknown	ENSMUSG00000004558	Ndrg2	0.0769231	0.0711224	0.34048
Unknown	ENSMUSG00000033910	Gucy1A1	0.0604396	0.0587854	0.339757
Unknown	ENSMUSG00000068876	Cgn	0.0549451	0.0524053	0.338876
Unknown	ENSMUSG00000032232	Cgnl1	0.252747	0.268937	0.335707
Unknown	ENSMUSG00000058897	Col25A1	0.0961538	0.13364	0.331554
Unknown	ENSMUSG00000060882	Kcnd2	0.118132	0.194316	0.329635
Unknown	ENSMUSG00000029864	Gstk1	0.0576923	0.0483963	0.329625
Unknown	ENSMUSG00000024331	Dsc2	0.0604396	0.0566222	0.328956
Unknown	ENSMUSG00000024211	Grm8	0.554945	1.3475	0.326185
Unknown	ENSMUSG00000033788	Dysf	0.131868	0.111112	0.325729
Unknown	ENSMUSG00000031355	Arhgap6	0.162088	0.142096	0.323476
Unknown	ENSMUSG00000041046	Ramp3	0.0549451	0.0433415	0.322154
Unknown	ENSMUSG00000044026	Slc35G1	0.0576923	0.055246	0.31997
Unknown	ENSMUSG00000033060	Lmo7	0.107143	0.0957229	0.319495
Unknown	ENSMUSG00000044708	Kcnj10	0.0714286	0.0693835	0.317391
Unknown	ENSMUSG00000066842	Hmcn1	0.0934066	0.0749973	0.316142
Unknown	ENSMUSG00000026107	Nabp1	0.0521978	0.0724944	0.314195
Unknown	ENSMUSG00000026167	Wnt10A	0.0796703	0.0628239	0.31141
Unknown	ENSMUSG00000029359	Tesc	0.104396	0.101317	0.311295
Unknown	ENSMUSG00000037725	Ckap2	0.115385	0.127321	0.311231
Unknown	ENSMUSG00000039232	Stx11	0.0576923	0.0406575	0.308585
Unknown	ENSMUSG00000028600	Podn	0.137363	0.179982	0.306666
Unknown	ENSMUSG00000021684	Pde8B	0.115385	0.131725	0.30664
Unknown	ENSMUSG00000005045	Chd5	0.126374	0.14275	0.306058
Unknown	ENSMUSG00000052726	Kcnt2	0.0961538	0.0850264	0.303939
Unknown	ENSMUSG00000050071	Bex1	0.351648	0.481328	0.303612
Unknown	ENSMUSG00000028782	Adgrb2	0.0604396	0.0394219	0.302613
Unknown	ENSMUSG00000052854	Nrk	0.0631868	0.0536493	0.302584
Unknown	ENSMUSG00000007888	Crlf1	0.228022	0.227936	0.301485
Unknown	ENSMUSG00000037509	Arhgef4	0.0989011	0.0745929	0.301117
Unknown	ENSMUSG00000035403	Crb2	0.0851648	0.0969539	0.300688
Unknown	ENSMUSG00000045083	Lingo2	0.123626	0.154306	0.300524
Unknown	ENSMUSG00000064080	Fbln2	0.0521978	0.0687482	0.300492

## Sheet: go_terms
cell_group	ID	Description	BgRatio	pvalue	p.adjust	qvalue	geneID	Count
ER_stressed	GO:0006986	response to unfolded protein	120/20514	1.41e-16	2.9e-13	1.95e-13	Hspb1/Hspa1a/Hspa1b/Atf3/Chac1/Ddit3/Atf4/Ppp1r15a/Hspa5/Ero1a/Hsp90aa1/Hsph1/Hspa9	13
ER_stressed	GO:0035966	response to topologically incorrect protein	142/20514	1.33e-15	1.36e-12	9.18e-13	Hspb1/Hspa1a/Hspa1b/Atf3/Chac1/Ddit3/Atf4/Ppp1r15a/Hspa5/Ero1a/Hsp90aa1/Hsph1/Hspa9	13
ER_stressed	GO:0051085	chaperone cofactor-dependent protein refolding	33/20514	1.4e-13	9.56e-11	6.44e-11	Hspa1a/Hspa1b/Dnajb1/Hspa5/Ero1a/Hsph1/Hspe1/Hspa9	8
ER_stressed	GO:0051084	de novo' post-translational protein folding	38/20514	4.86e-13	2.08e-10	1.4e-10	Hspa1a/Hspa1b/Dnajb1/Hspa5/Ero1a/Hsph1/Hspe1/Hspa9	8
ER_stressed	GO:0042026	protein refolding	22/20514	5.84e-13	2.08e-10	1.4e-10	Hspb1/Hspa1a/Hspa1b/Dnaja4/Hspa5/Hsp90aa1/Hspa9	7
ER_stressed	GO:0006458	de novo' protein folding	39/20514	6.1e-13	2.08e-10	1.4e-10	Hspa1a/Hspa1b/Dnajb1/Hspa5/Ero1a/Hsph1/Hspe1/Hspa9	8
ER_stressed	GO:0061077	chaperone-mediated protein folding	65/20514	8.83e-13	2.59e-10	1.74e-10	Hspb1/Hspa1a/Hspa1b/Dnajb1/Hspa5/Ero1a/Hsph1/Hspe1/Hspa9	9
ER_stressed	GO:0006457	protein folding	167/20514	9.06e-12	2.32e-09	1.56e-09	Hspb1/Hspa1a/Hspa1b/Dnaja4/Dnajb1/Hspa5/Ero1a/Hsp90aa1/Hsph1/Hspe1/Hspa9	11
ER_stressed	GO:0034620	cellular response to unfolded protein	91/20514	2.02e-11	4.6e-09	3.1e-09	Hspa1a/Hspa1b/Atf3/Ddit3/Atf4/Ppp1r15a/Hspa5/Ero1a/Hspa9	9
ER_stressed	GO:0035967	cellular response to topologically incorrect protein	111/20514	1.24e-10	2.53e-08	1.71e-08	Hspa1a/Hspa1b/Atf3/Ddit3/Atf4/Ppp1r15a/Hspa5/Ero1a/Hspa9	9
ER_stressed	GO:0043618	regulation of transcription from RNA polymerase II promoter in response to stress	50/20514	3.17e-10	5.91e-08	3.98e-08	Dnajb1/Atf3/Ddit3/Atf4/Vegfa/Ppp1r15a/Hmox1	7
ER_stressed	GO:0043620	regulation of DNA-templated transcription in response to stress	55/20514	6.36e-10	1.09e-07	7.32e-08	Dnajb1/Atf3/Ddit3/Atf4/Vegfa/Ppp1r15a/Hmox1	7
ER_stressed	GO:2001236	regulation of extrinsic apoptotic signaling pathway	170/20514	5.52e-09	8.7e-07	5.86e-07	Hspa1a/Hspa1b/Atf3/Gdnf/Lgals3/Vegfa/Inhba/Hmox1/Tnfrsf23	9
ER_stressed	GO:2001233	regulation of apoptotic signaling pathway	407/20514	1.01e-08	1.47e-06	9.93e-07	Hspb1/Hspa1a/Hspa1b/Atf3/Ddit3/Gdnf/Lgals3/Vegfa/Inhba/Hmox1/Hsph1/Tnfrsf23	12
ER_stressed	GO:1900407	regulation of cellular response to oxidative stress	91/20514	2.31e-08	3.15e-06	2.12e-06	Hspb1/Pycr1/Atf4/Slc7a11/Dhfr/Gch1/Hsph1	7
ER_stressed	GO:0090084	negative regulation of inclusion body assembly	11/20514	3.8e-08	4.87e-06	3.28e-06	Hspa1a/Hspa1b/Dnaja4/Dnajb1	4
ER_stressed	GO:1902882	regulation of response to oxidative stress	100/20514	4.45e-08	5.37e-06	3.62e-06	Hspb1/Pycr1/Atf4/Slc7a11/Dhfr/Gch1/Hsph1	7
ER_stressed	GO:2001237	negative regulation of extrinsic apoptotic signaling pathway	105/20514	6.25e-08	7.12e-06	4.8e-06	Hspa1a/Hspa1b/Gdnf/Lgals3/Vegfa/Hmox1/Tnfrsf23	7
ER_stressed	GO:0030968	endoplasmic reticulum unfolded protein response	69/20514	1.18e-07	1.24e-05	8.35e-06	Atf3/Ddit3/Atf4/Ppp1r15a/Hspa5/Ero1a	6
ER_stressed	GO:0097191	extrinsic apoptotic signaling pathway	243/20514	1.21e-07	1.24e-05	8.35e-06	Hspa1a/Hspa1b/Atf3/Gdnf/Lgals3/Vegfa/Inhba/Hmox1/Tnfrsf23	9
ER_stressed	GO:2001234	negative regulation of apoptotic signaling pathway	247/20514	1.39e-07	1.36e-05	9.14e-06	Hspb1/Hspa1a/Hspa1b/Gdnf/Lgals3/Vegfa/Hmox1/Hsph1/Tnfrsf23	9
ER_stressed	GO:0062197	cellular response to chemical stress	336/20514	1.76e-07	1.64e-05	1.1e-05	Hspb1/Ddit3/Pycr1/Atf4/Srxn1/Slc7a11/Hmox1/Dhfr/Gch1/Hsph1	10
ER_stressed	GO:0034976	response to endoplasmic reticulum stress	258/20514	2.01e-07	1.79e-05	1.21e-05	Trib3/Niban1/Atf3/Chac1/Ddit3/Atf4/Ppp1r15a/Hspa5/Ero1a	9
ER_stressed	GO:0034599	cellular response to oxidative stress	274/20514	3.34e-07	2.85e-05	1.92e-05	Hspb1/Pycr1/Atf4/Srxn1/Slc7a11/Hmox1/Dhfr/Gch1/Hsph1	9
ER_stressed	GO:0090083	regulation of inclusion body assembly	19/20514	4.37e-07	3.59e-05	2.42e-05	Hspa1a/Hspa1b/Dnaja4/Dnajb1	4
ER_stressed	GO:0046653	tetrahydrofolate metabolic process	21/20514	6.72e-07	5.3e-05	3.57e-05	Mthfd2/Dhfr/Gch1/Aldh1l2	4
ER_stressed	GO:0009408	response to heat	99/20514	1.02e-06	7.33e-05	4.94e-05	Hspb1/Hspa1a/Hspa1b/Dnaja4/Hmox1/Hsp90aa1	6
ER_stressed	GO:1903202	negative regulation of oxidative stress-induced cell death	54/20514	1.03e-06	7.33e-05	4.94e-05	Hspb1/Pycr1/Atf4/Slc7a11/Hsph1	5
ER_stressed	GO:0006979	response to oxidative stress	408/20514	1.04e-06	7.33e-05	4.94e-05	Hspb1/Pycr1/Atf4/Srxn1/Slc7a11/Hmox1/Dhfr/Gch1/Ero1a/Hsph1	10
ER_stressed	GO:0006760	folic acid-containing compound metabolic process	26/20514	1.66e-06	0.000113	7.63e-05	Mthfd2/Dhfr/Gch1/Aldh1l2	4
ER_stressed	GO:0036003	positive regulation of transcription from RNA polymerase II promoter in response to stress	27/20514	1.94e-06	0.000122	8.21e-05	Atf3/Ddit3/Atf4/Vegfa	4
ER_stressed	GO:0070841	inclusion body assembly	27/20514	1.94e-06	0.000122	8.21e-05	Hspa1a/Hspa1b/Dnaja4/Dnajb1	4
ER_stressed	GO:0070997	neuron death	438/20514	1.96e-06	0.000122	8.21e-05	Ddit3/Gdnf/Gpnmb/Atf4/Vegfa/Slc7a11/Hmox1/Mt1/Hsph1/Tnfrsf23	10
ER_stressed	GO:0070059	intrinsic apoptotic signaling pathway in response to endoplasmic reticulum stress	64/20514	2.43e-06	0.000146	9.83e-05	Trib3/Chac1/Ddit3/Atf4/Ero1a	5
ER_stressed	GO:0006520	cellular amino acid metabolic process	259/20514	2.49e-06	0.000146	9.83e-05	Asns/Pycr1/Atf4/Slc7a11/Dhfr/Psph/Gars/Cars	8
ER_stressed	GO:1901215	negative regulation of neuron death	261/20514	2.64e-06	0.00015	0.000101	Gdnf/Gpnmb/Atf4/Vegfa/Slc7a11/Hmox1/Mt1/Hsph1	8
ER_stressed	GO:0042594	response to starvation	186/20514	3.02e-06	0.000167	0.000113	Atf3/Asns/Ddit3/Pck2/Atf4/Eif4ebp1/Hspa5	7
ER_stressed	GO:0042558	pteridine-containing compound metabolic process	31/20514	3.44e-06	0.000186	0.000125	Mthfd2/Dhfr/Gch1/Aldh1l2	4
ER_stressed	GO:0048872	homeostasis of number of cells	365/20514	3.58e-06	0.000188	0.000127	Hspa1a/Hspa1b/Vegfa/Inhba/Slc7a11/Hmox1/Arhgef5/Tnfrsf23/Hspa9	9
ER_stressed	GO:0002262	myeloid cell homeostasis	198/20514	4.56e-06	0.000234	0.000158	Hspa1a/Hspa1b/Vegfa/Inhba/Slc7a11/Hmox1/Hspa9	7
ER_stressed	GO:1990440	positive regulation of transcription from RNA polymerase II promoter in response to endoplasmic reticulum stress	11/20514	5.89e-06	0.000295	0.000199	Atf3/Ddit3/Atf4	3
ER_stressed	GO:1901214	regulation of neuron death	392/20514	6.38e-06	0.000312	0.00021	Ddit3/Gdnf/Gpnmb/Atf4/Vegfa/Slc7a11/Hmox1/Mt1/Hsph1	9
ER_stressed	GO:1903201	regulation of oxidative stress-induced cell death	80/20514	7.35e-06	0.00035	0.000236	Hspb1/Pycr1/Atf4/Slc7a11/Hsph1	5
ER_stressed	GO:0009991	response to extracellular stimulus	407/20514	8.63e-06	0.000392	0.000264	Gdf15/Atf3/Asns/Ddit3/Pck2/Fosl1/Atf4/Eif4ebp1/Hspa5	9
ER_stressed	GO:0038034	signal transduction in absence of ligand	83/20514	8.8e-06	0.000392	0.000264	Hspa1a/Hspa1b/Gdnf/Inhba/Tnfrsf23	5
ER_stressed	GO:0097192	extrinsic apoptotic signaling pathway in absence of ligand	83/20514	8.8e-06	0.000392	0.000264	Hspa1a/Hspa1b/Gdnf/Inhba/Tnfrsf23	5
ER_stressed	GO:0097193	intrinsic apoptotic signaling pathway	309/20514	9.12e-06	0.000398	0.000268	Hspb1/Trib3/Chac1/Ddit3/Atf4/Hmox1/Ero1a/Hsph1	8
ER_stressed	GO:0051402	neuron apoptotic process	318/20514	1.12e-05	0.00048	0.000323	Ddit3/Gdnf/Atf4/Vegfa/Hmox1/Mt1/Hsph1/Tnfrsf23	8
ER_stressed	GO:1901031	regulation of response to reactive oxygen species	42/20514	1.19e-05	0.000498	0.000336	Pycr1/Dhfr/Gch1/Hsph1	4
ER_stressed	GO:0051090	regulation of DNA-binding transcription factor activity	435/20514	1.47e-05	0.000591	0.000398	Hspa1a/Hspa1b/Klf4/Ddit3/Fosl1/Vegfa/Hmox1/Arhgef5/Hmga2	9
ER_stressed	GO:0034101	erythrocyte homeostasis	157/20514	1.47e-05	0.000591	0.000398	Hspa1a/Hspa1b/Vegfa/Inhba/Hmox1/Hspa9	6
ER_stressed	GO:2001239	regulation of extrinsic apoptotic signaling pathway in absence of ligand	49/20514	2.22e-05	0.000863	0.000582	Hspa1a/Hspa1b/Gdnf/Inhba	4
ER_stressed	GO:0009266	response to temperature stimulus	169/20514	2.23e-05	0.000863	0.000582	Hspb1/Hspa1a/Hspa1b/Dnaja4/Hmox1/Hsp90aa1	6
ER_stressed	GO:0036473	cell death in response to oxidative stress	102/20514	2.4e-05	0.000913	0.000615	Hspb1/Pycr1/Atf4/Slc7a11/Hsph1	5
ER_stressed	GO:0022407	regulation of cell-cell adhesion	466/20514	2.52e-05	0.000939	0.000633	Cdsn/Hspb1/Klf4/Gpnmb/Lgals3/Slc7a1/Vegfa/Hsp90aa1/Hsph1	9
ER_stressed	GO:0045646	regulation of erythrocyte differentiation	51/20514	2.6e-05	0.000939	0.000633	Hspa1a/Hspa1b/Inhba/Hspa9	4
ER_stressed	GO:0045444	fat cell differentiation	259/20514	2.61e-05	0.000939	0.000633	Trib3/Klf4/Ddit3/Atf5/Vegfa/Ero1a/Hmga2	7
ER_stressed	GO:1902041	regulation of extrinsic apoptotic signaling pathway via death domain receptors	52/20514	2.81e-05	0.000993	0.000669	Atf3/Lgals3/Hmox1/Tnfrsf23	4
ER_stressed	GO:0007369	gastrulation	179/20514	3.08e-05	0.0010719	0.000722	Klf4/Inhba/Tgif1/Fn1/Hmga2/Phldb2	6
ER_stressed	GO:0045766	positive regulation of angiogenesis	183/20514	3.49e-05	0.00113548	0.000765	Hspb1/Klf4/Lgals3/Vegfa/Hmox1/Hmga2	6
ER_stressed	GO:1904018	positive regulation of vasculature development	183/20514	3.49e-05	0.00113548	0.000765	Hspb1/Klf4/Lgals3/Vegfa/Hmox1/Hmga2	6
ER_stressed	GO:0034605	cellular response to heat	55/20514	3.51e-05	0.00113548	0.000765	Hspa1a/Hspa1b/Hmox1/Hsp90aa1	4
ER_stressed	GO:0031667	response to nutrient levels	373/20514	3.52e-05	0.00113548	0.000765	Gdf15/Atf3/Asns/Ddit3/Pck2/Atf4/Eif4ebp1/Hspa5	8
ER_stressed	GO:0051091	positive regulation of DNA-binding transcription factor activity	272/20514	3.57e-05	0.00113548	0.000765	Hspa1a/Hspa1b/Ddit3/Fosl1/Vegfa/Arhgef5/Hmga2	7
ER_stressed	GO:1901605	alpha-amino acid metabolic process	184/20514	3.6e-05	0.00113548	0.000765	Asns/Pycr1/Atf4/Slc7a11/Dhfr/Psph	6
ER_stressed	GO:1901607	alpha-amino acid biosynthetic process	57/20514	4.05e-05	0.00125716	0.000847	Asns/Pycr1/Dhfr/Psph	4
ER_stressed	GO:0009611	response to wounding	499/20514	4.3e-05	0.00130726	0.000881	Klf4/Ddit3/Gdnf/Vegfa/Slc7a11/Hmox1/Dhfr/Fn1/Phldb2	9
ER_stressed	GO:0098754	detoxification	58/20514	4.34e-05	0.00130726	0.000881	Dhfr/Gch1/Mt1/Mt2	4
ER_stressed	GO:0043523	regulation of neuron apoptotic process	283/20514	4.59e-05	0.00136314	0.000918	Ddit3/Gdnf/Atf4/Vegfa/Hmox1/Mt1/Hsph1	7
ER_stressed	GO:0008652	cellular amino acid biosynthetic process	62/20514	5.64e-05	0.00165291	0.00111354	Asns/Pycr1/Dhfr/Psph	4
ER_stressed	GO:0006575	cellular modified amino acid metabolic process	201/20514	5.89e-05	0.00168151	0.00113281	Chac1/Mthfd2/Slc7a11/Dhfr/Gch1/Aldh1l2	6
ER_stressed	GO:0009636	response to toxic substance	123/20514	5.91e-05	0.00168151	0.00113281	Slc7a11/Dhfr/Gch1/Mt1/Mt2	5
ER_stressed	GO:0031334	positive regulation of protein-containing complex assembly	206/20514	6.75e-05	0.00189585	0.00127721	Hspa1a/Hspa1b/Lgals3/Vegfa/Hsp90aa1/Arhgef5	6
ER_stressed	GO:0022408	negative regulation of cell-cell adhesion	207/20514	6.93e-05	0.00192101	0.00129415	Cdsn/Hspb1/Klf4/Gpnmb/Lgals3/Vegfa	6
ER_stressed	GO:0045765	regulation of angiogenesis	307/20514	7.66e-05	0.00209296	0.00140999	Hspb1/Klf4/Lgals3/Vegfa/Ppp1r15a/Hmox1/Hmga2	7
ER_stressed	GO:1901342	regulation of vasculature development	311/20514	8.3e-05	0.00223951	0.00150872	Hspb1/Klf4/Lgals3/Vegfa/Ppp1r15a/Hmox1/Hmga2	7
ER_stressed	GO:0007162	negative regulation of cell adhesion	312/20514	8.47e-05	0.00225518	0.00151928	Cdsn/Hspb1/Klf4/Gpnmb/Lgals3/Vegfa/Phldb2	7
ER_stressed	GO:0007263	nitric oxide mediated signal transduction	26/20514	8.96e-05	0.00229551	0.00154645	Vegfa/Mt1/Mt2	3
ER_stressed	GO:0071276	cellular response to cadmium ion	26/20514	8.96e-05	0.00229551	0.00154645	Hmox1/Mt1/Mt2	3
ER_stressed	GO:0071549	cellular response to dexamethasone stimulus	26/20514	8.96e-05	0.00229551	0.00154645	Pck2/Gdnf/Eif4ebp1	3
ER_stressed	GO:0032770	positive regulation of monooxygenase activity	29/20514	0.000125	0.00308708	0.00207972	Gdnf/Dhfr/Gch1	3
ER_stressed	GO:0035987	endodermal cell differentiation	29/20514	0.000125	0.00308708	0.00207972	Inhba/Fn1/Hmga2	3
ER_stressed	GO:0071548	response to dexamethasone	29/20514	0.000125	0.00308708	0.00207972	Pck2/Gdnf/Eif4ebp1	3
ER_stressed	GO:0030218	erythrocyte differentiation	145/20514	0.000129	0.00313896	0.00211467	Hspa1a/Hspa1b/Vegfa/Inhba/Hspa9	5
ER_stressed	GO:0045648	positive regulation of erythrocyte differentiation	30/20514	0.000139	0.00330387	0.00222577	Hspa1a/Hspa1b/Inhba	3
ER_stressed	GO:0032677	regulation of interleukin-8 production	78/20514	0.000139	0.00330387	0.00222577	Hspa1a/Hspa1b/Klf4/Ddit3	4
ER_stressed	GO:0032637	interleukin-8 production	79/20514	0.000146	0.0034314	0.00231168	Hspa1a/Hspa1b/Klf4/Ddit3	4
ER_stressed	GO:1903037	regulation of leukocyte cell-cell adhesion	342/20514	0.00015	0.00348666	0.00234891	Hspb1/Klf4/Gpnmb/Lgals3/Slc7a1/Hsp90aa1/Hsph1	7
ER_stressed	GO:0008625	extrinsic apoptotic signaling pathway via death domain receptors	83/20514	0.000176	0.0040612	0.00273597	Atf3/Lgals3/Hmox1/Tnfrsf23	4
ER_stressed	GO:0045995	regulation of embryonic development	87/20514	0.000211	0.00481576	0.0032443	Tgif1/Hspa5/Lama1/Phldb2	4
ER_stressed	GO:1901099	negative regulation of signal transduction in absence of ligand	35/20514	0.000221	0.00491706	0.00331255	Hspa1a/Hspa1b/Gdnf	3
ER_stressed	GO:2001240	negative regulation of extrinsic apoptotic signaling pathway in absence of ligand	35/20514	0.000221	0.00491706	0.00331255	Hspa1a/Hspa1b/Gdnf	3
ER_stressed	GO:0071383	cellular response to steroid hormone stimulus	164/20514	0.000228	0.00503654	0.00339304	Pck2/Gdnf/Eif4ebp1/Hmga2/Taf7	5
ER_stressed	GO:0009069	serine family amino acid metabolic process	37/20514	0.000261	0.00562589	0.00379007	Slc7a11/Dhfr/Psph	3
ER_stressed	GO:0046686	response to cadmium ion	37/20514	0.000261	0.00562589	0.00379007	Hmox1/Mt1/Mt2	3
ER_stressed	GO:0043535	regulation of blood vessel endothelial cell migration	93/20514	0.000273	0.0058331	0.00392966	Hspb1/Klf4/Vegfa/Hmox1	4
ER_stressed	GO:0007159	leukocyte cell-cell adhesion	381/20514	0.000289	0.00611459	0.00411931	Hspb1/Klf4/Gpnmb/Lgals3/Slc7a1/Hsp90aa1/Hsph1	7
ER_stressed	GO:0010594	regulation of endothelial cell migration	174/20514	0.0003	0.00619414	0.00417289	Hspb1/Klf4/Dnaja4/Vegfa/Hmox1	5
ER_stressed	GO:0001706	endoderm formation	39/20514	0.000305	0.00619414	0.00417289	Inhba/Fn1/Hmga2	3
ER_stressed	GO:0042398	cellular modified amino acid biosynthetic process	39/20514	0.000305	0.00619414	0.00417289	Slc7a11/Dhfr/Gch1	3
ER_stressed	GO:0090049	regulation of cell migration involved in sprouting angiogenesis	39/20514	0.000305	0.00619414	0.00417289	Klf4/Vegfa/Hmox1	3
ER_stressed	GO:0051896	regulation of protein kinase B signaling	176/20514	0.000317	0.0063637	0.00428713	Gdf15/Klf4/Ddit3/Vegfa/Hsp90aa1	5
ER_stressed	GO:0006730	one-carbon metabolic process	40/20514	0.000329	0.00655057	0.00441301	Mthfd2/Dhfr/Aldh1l2	3
ER_stressed	GO:1900744	regulation of p38MAPK cascade	42/20514	0.000381	0.00750203	0.005054	Vegfa/Gadd45b/Hsph1	3
ER_stressed	GO:0006984	ER-nucleus signaling pathway	43/20514	0.000408	0.00796869	0.00536838	Ddit3/Atf4/Hspa5	3
ER_stressed	GO:0043524	negative regulation of neuron apoptotic process	190/20514	0.00045	0.00869623	0.00585851	Gdnf/Vegfa/Hmox1/Mt1/Hsph1	5
ER_stressed	GO:0000302	response to reactive oxygen species	191/20514	0.000461	0.0088237	0.00594439	Pycr1/Hmox1/Dhfr/Gch1/Hsph1	5
ER_stressed	GO:0071385	cellular response to glucocorticoid stimulus	45/20514	0.000467	0.00886536	0.00597245	Pck2/Gdnf/Eif4ebp1	3
ER_stressed	GO:0061687	detoxification of inorganic compound	10/20514	0.000493	0.00910656	0.00613494	Mt1/Mt2	2
ER_stressed	GO:0097501	stress response to metal ion	10/20514	0.000493	0.00910656	0.00613494	Mt1/Mt2	2
ER_stressed	GO:1903589	positive regulation of blood vessel endothelial cell proliferation involved in sprouting angiogenesis	10/20514	0.000493	0.00910656	0.00613494	Vegfa/Hmox1	2
ER_stressed	GO:0032768	regulation of monooxygenase activity	46/20514	0.000498	0.00912321	0.00614616	Gdnf/Dhfr/Gch1	3
Immune_reactive	GO:0002250	adaptive immune response	475/20514	1.33e-28	4.22e-25	2.84e-25	Csf2rb2/Fcgr2b/Il21r/C3ar1/Klhl6/C1qb/C1qc/Slc11a1/Clec4n/C1qa/Trem2/Inpp5d/Csf2rb/Syk/Lilrb4b/Nfkbid/Ptprc/Cd84/Tnfrsf11a/Cd48/Adgre1/Fcer1g/Fcgr3/Cx3cr1/Nckap1l/Cd86/Pycard/P2rx7/Unc93b1/Tec/Lyn/Mef2c/Vsir/Pou2f2/Ptpn6/Tcirg1/Cfh/Prkcb/Ptk2b/Il4ra/Tnfrsf1b/Prkcd/Ctsh	43
Immune_reactive	GO:0002443	leukocyte mediated immunity	455/20514	2.83e-28	4.48e-25	3.02e-25	Csf2rb2/Fcgr2b/Rac2/Il21r/C1qb/C1qc/Slc11a1/Milr1/C1qa/Itgam/Trem2/Vav1/Inpp5d/Tyrobp/Csf2rb/Syk/Myo1f/Lilrb4b/Ptprc/Cd84/Fcer1g/Fcgr3/Cx3cr1/Nckap1l/Ncf1/Spi1/Itgb2/P2rx7/Lyn/Vsir/Pou2f2/Ptpn6/Lgals9/Tcirg1/Cfh/Abr/Pld2/Tlr4/Il4ra/Tnfrsf1b/Prkcd/Ctsh	42
Immune_reactive	GO:0002764	immune response-regulating signaling pathway	386/20514	1.67e-25	1.76e-22	1.19e-22	Pik3ap1/Lcp2/C3ar1/Klhl6/Clec4n/Fyb/Trem2/Cd33/Tyrobp/Syk/Blnk/Laptm5/Lilrb4b/Nfkbid/Ptprc/Tlr13/Fcer1g/Slc15a3/Nckap1l/Tlr7/Cd86/Prkch/Unc93b1/Tec/Cd180/Lyn/Mef2c/Ptpn6/Lgals9/Prkcb/Lpxn/Plcl2/Tlr4/Ptprj/Cyba/Rab7b/Ctsh	37
Immune_reactive	GO:0002274	myeloid leukocyte activation	260/20514	2.57e-24	1.99e-21	1.34e-21	Fcgr4/Rac2/Lcp2/Slc11a1/Milr1/C1qa/Itgam/Trem2/Cd33/Tyrobp/Syk/Myo1f/Lilrb4b/Dock2/Cd84/Cd48/Fcer1g/Fcgr3/Cx3cr1/Spi1/Itgb2/Pycard/Lyn/Ptpn6/Lgals9/Abr/Pld2/Tlr4/Il4ra/Tgfbr2/Prkcd	31
Immune_reactive	GO:0002253	activation of immune response	311/20514	3.33e-24	1.99e-21	1.34e-21	Ifi207/Lcp2/C3ar1/Klhl6/C1qb/C1qc/Clec4n/Fyb/C1qa/Nlrc4/Trem2/Tyrobp/Syk/Blnk/Laptm5/Lilrb4b/Nfkbid/Ptprc/Fcer1g/Nckap1l/Pycard/Prkch/Tec/Lyn/Mef2c/Aim2/Ptpn6/Cfh/Prkcb/Lpxn/Plcl2/Tlr4/Ptprj	33
Immune_reactive	GO:0070661	leukocyte proliferation	365/20514	3.78e-24	1.99e-21	1.34e-21	Csf2rb2/Fcgr2b/Rac2/Csf1r/Slc11a1/Itgam/Trem2/Inpp5d/Tyrobp/Csf2rb/Syk/Laptm5/Lilrb4b/Ptprc/Dock2/Dock8/Nckap1l/Itgb2/Cd86/Pycard/P2rx7/Cd180/Lyn/Mef2c/Vsir/Ptpn6/Lgals9/Tcirg1/Plcl2/Tlr4/Tgfbr2/Gal/Tnfrsf1b/Prkcd/Csf2ra	35
Immune_reactive	GO:0002366	leukocyte activation involved in immune response	322/20514	1.33e-22	6.01e-20	4.04e-20	Rac2/Slc11a1/Milr1/Itgam/Trem2/Tyrobp/Syk/Myo1f/Nfkbid/Ptprc/Dock2/Cd84/Fcer1g/Cx3cr1/Nckap1l/Spi1/Itgb2/Pycard/Apbb1ip/Lcp1/Cd180/Lyn/Irf8/Ptpn6/Lgals9/Abr/Plcl2/Pld2/Tlr4/Ptk2b/Il4ra/Dock10	32
Immune_reactive	GO:0002263	cell activation involved in immune response	326/20514	1.95e-22	7.7e-20	5.18e-20	Rac2/Slc11a1/Milr1/Itgam/Trem2/Tyrobp/Syk/Myo1f/Nfkbid/Ptprc/Dock2/Cd84/Fcer1g/Cx3cr1/Nckap1l/Spi1/Itgb2/Pycard/Apbb1ip/Lcp1/Cd180/Lyn/Irf8/Ptpn6/Lgals9/Abr/Plcl2/Pld2/Tlr4/Ptk2b/Il4ra/Dock10	32
Immune_reactive	GO:0006909	phagocytosis	250/20514	2.77e-21	9.75e-19	6.56e-19	Fcgr2b/Arhgap25/Rac2/Slc11a1/Itgam/Trem2/Vav1/Tyrobp/Syk/Ptprc/Dock2/Msr1/Fcer1g/Fcgr3/Nckap1l/Pld4/Itgb2/Pycard/P2ry6/P2rx7/Hck/Irf8/Abr/Tlr4/Ptprj/Sirpa/Cyba/Rab7b	28
Immune_reactive	GO:0032943	mononuclear cell proliferation	336/20514	6.79e-20	2.15e-17	1.45e-17	Fcgr2b/Rac2/Csf1r/Slc11a1/Itgam/Inpp5d/Tyrobp/Syk/Laptm5/Lilrb4b/Ptprc/Dock2/Dock8/Nckap1l/Itgb2/Cd86/Pycard/P2rx7/Cd180/Lyn/Mef2c/Vsir/Ptpn6/Lgals9/Plcl2/Tlr4/Tgfbr2/Gal/Tnfrsf1b/Prkcd	30
Immune_reactive	GO:0002460	adaptive immune response based on somatic recombination of immune receptors built from immunoglobulin superfamily domains	344/20514	1.33e-19	3.82e-17	2.57e-17	Csf2rb2/Fcgr2b/Il21r/C3ar1/Klhl6/C1qb/C1qc/Slc11a1/Clec4n/C1qa/Trem2/Inpp5d/Csf2rb/Lilrb4b/Nfkbid/Ptprc/Fcer1g/Fcgr3/Nckap1l/P2rx7/Mef2c/Vsir/Pou2f2/Ptpn6/Tcirg1/Cfh/Il4ra/Tnfrsf1b/Prkcd/Ctsh	30
Immune_reactive	GO:0032103	positive regulation of response to external stimulus	449/20514	3.34e-19	8.8e-17	5.92e-17	Ifi207/Pik3cg/Rac2/C3ar1/Csf1r/Clec4n/Nlrc4/Ccr1/Ctss/Trem2/Vav1/Tyrobp/Syk/Tnfrsf11a/Fcer1g/Ly86/Fcgr3/Cx3cr1/Nckap1l/Spi1/Pycard/Pla2g7/Cd180/Lpl/Aim2/Lgals9/Ikbke/Lgmn/P2ry12/Tlr4/Ptk2b/Ptprj/Cyba	33
Immune_reactive	GO:0002697	regulation of immune effector process	418/20514	3.64e-19	8.87e-17	5.96e-17	Fcgr2b/Rac2/Itgam/Trem2/Vav1/Tyrobp/Syk/Laptm5/Lilrb4b/Nfkbid/Ptprc/Cd84/Fcer1g/Fcgr3/Cx3cr1/Nckap1l/Ncf1/Spi1/Itgb2/Cd86/P2rx7/Lyn/Vsir/Ptpn6/Lgals9/Cfh/Abr/Pld2/Tlr4/Ptprj/Il4ra/Tnfrsf1b	32
Immune_reactive	GO:0046651	lymphocyte proliferation	332/20514	5.39e-19	1.22e-16	8.2e-17	Fcgr2b/Rac2/Slc11a1/Itgam/Inpp5d/Tyrobp/Syk/Laptm5/Lilrb4b/Ptprc/Dock2/Dock8/Nckap1l/Itgb2/Cd86/Pycard/P2rx7/Cd180/Lyn/Mef2c/Vsir/Ptpn6/Lgals9/Plcl2/Tlr4/Tgfbr2/Gal/Tnfrsf1b/Prkcd	29
Immune_reactive	GO:0030099	myeloid cell differentiation	436/20514	1.27e-18	2.68e-16	1.8e-16	Ifi207/Csf1r/C1qc/Itgam/Ccr1/Trem2/Inpp5d/Tyrobp/Lilrb4b/Ikzf1/Tnfrsf11a/Nrros/Fcer1g/Hcls1/Nckap1l/Spi1/Rassf2/Fli1/Gab3/Lyn/Irf8/Mef2c/Dab2/Mafb/Ptpn6/Mitf/Casp8/Tcirg1/Sh2b3/Ptk2b/Tgfbr2/Rab7b	32
Immune_reactive	GO:0002757	immune response-activating signal transduction	215/20514	2.44e-18	4.83e-16	3.25e-16	Lcp2/C3ar1/Klhl6/Clec4n/Fyb/Tyrobp/Syk/Blnk/Laptm5/Lilrb4b/Nfkbid/Ptprc/Fcer1g/Nckap1l/Prkch/Tec/Lyn/Mef2c/Ptpn6/Prkcb/Lpxn/Plcl2/Tlr4/Ptprj	24
Immune_reactive	GO:0002275	myeloid cell activation involved in immune response	114/20514	4.5e-18	8.37e-16	5.63e-16	Rac2/Milr1/Itgam/Trem2/Tyrobp/Syk/Myo1f/Dock2/Cd84/Fcer1g/Cx3cr1/Spi1/Itgb2/Pycard/Lyn/Ptpn6/Abr/Pld2/Il4ra	19
Immune_reactive	GO:1903706	regulation of hemopoiesis	400/20514	9.17e-18	1.61e-15	1.08e-15	Csf1r/C1qc/Itgam/Ccr1/Trem2/Inpp5d/Cd83/Tyrobp/Syk/Lilrb4b/Nfkbid/Ptprc/Ikzf1/Hcls1/Nckap1l/Spi1/Rassf2/Lyn/Mef2c/Vsir/Mafb/Ptpn6/Mitf/Lgals9/Casp8/Sh2b3/Ptk2b/Il4ra/Tgfbr2/Rab7b	30
Immune_reactive	GO:0050900	leukocyte migration	377/20514	1.71e-17	2.84e-15	1.91e-15	Rac2/C3ar1/Csf1r/Itgam/Ccr1/Trem2/Vav1/Syk/Fcer1g/Dock8/Fcgr3/Cx3cr1/Nckap1l/Spi1/Itgb2/Pycard/Selplg/Pla2g7/Lyn/Hrh1/Spp1/Cxcl16/Lgals9/Lgmn/Abr/P2ry12/Ptk2b/Ptprj/Sirpa	29
Immune_reactive	GO:0002703	regulation of leukocyte mediated immunity	288/20514	1.79e-17	2.84e-15	1.91e-15	Fcgr2b/Rac2/Itgam/Trem2/Vav1/Tyrobp/Syk/Lilrb4b/Ptprc/Cd84/Fcer1g/Fcgr3/Cx3cr1/Nckap1l/Spi1/Itgb2/P2rx7/Lyn/Vsir/Ptpn6/Lgals9/Abr/Pld2/Tlr4/Il4ra/Tnfrsf1b	26
Immune_reactive	GO:0032675	regulation of interleukin-6 production	166/20514	2.64e-17	3.98e-15	2.68e-15	Trem2/Inpp5d/Tyrobp/Syk/Laptm5/Lilrb4b/Cd84/Fcer1g/Nckap1l/Tlr7/Pycard/P2rx7/Unc93b1/Lpl/Pou2f2/Ptpn6/Lgals9/Tlr4/Sirpa/Cyba/Rab7b	21
Immune_reactive	GO:0002429	immune response-activating cell surface receptor signaling pathway	214/20514	3.02e-17	4.34e-15	2.92e-15	Lcp2/C3ar1/Klhl6/Clec4n/Fyb/Tyrobp/Syk/Blnk/Laptm5/Lilrb4b/Nfkbid/Ptprc/Fcer1g/Nckap1l/Prkch/Tec/Lyn/Mef2c/Ptpn6/Prkcb/Lpxn/Plcl2/Ptprj	23
Immune_reactive	GO:0002573	myeloid leukocyte differentiation	243/20514	4.24e-17	5.84e-15	3.93e-15	Ifi207/Csf1r/C1qc/Itgam/Ccr1/Trem2/Inpp5d/Tyrobp/Lilrb4b/Ikzf1/Tnfrsf11a/Nrros/Fcer1g/Hcls1/Spi1/Rassf2/Gab3/Lyn/Mef2c/Mafb/Mitf/Casp8/Tcirg1/Tgfbr2	24
Immune_reactive	GO:0032635	interleukin-6 production	175/20514	7.95e-17	1.05e-14	7.05e-15	Trem2/Inpp5d/Tyrobp/Syk/Laptm5/Lilrb4b/Cd84/Fcer1g/Nckap1l/Tlr7/Pycard/P2rx7/Unc93b1/Lpl/Pou2f2/Ptpn6/Lgals9/Tlr4/Sirpa/Cyba/Rab7b	21
Immune_reactive	GO:0002768	immune response-regulating cell surface receptor signaling pathway	225/20514	9.25e-17	1.17e-14	7.87e-15	Lcp2/C3ar1/Klhl6/Clec4n/Fyb/Tyrobp/Syk/Blnk/Laptm5/Lilrb4b/Nfkbid/Ptprc/Fcer1g/Nckap1l/Prkch/Tec/Lyn/Mef2c/Ptpn6/Prkcb/Lpxn/Plcl2/Ptprj	23
Immune_reactive	GO:0002449	lymphocyte mediated immunity	340/20514	1.08e-16	1.31e-14	8.83e-15	Csf2rb2/Fcgr2b/Il21r/C1qb/C1qc/Slc11a1/C1qa/Trem2/Vav1/Inpp5d/Csf2rb/Lilrb4b/Ptprc/Fcer1g/Fcgr3/Nckap1l/P2rx7/Vsir/Pou2f2/Ptpn6/Lgals9/Tcirg1/Cfh/Il4ra/Tnfrsf1b/Prkcd/Ctsh	27
Immune_reactive	GO:0097529	myeloid leukocyte migration	227/20514	1.13e-16	1.32e-14	8.87e-15	Rac2/C3ar1/Csf1r/Itgam/Ccr1/Trem2/Vav1/Syk/Fcer1g/Fcgr3/Cx3cr1/Nckap1l/Spi1/Itgb2/Pla2g7/Lyn/Hrh1/Spp1/Lgmn/P2ry12/Ptk2b/Ptprj/Sirpa	23
Immune_reactive	GO:0002683	negative regulation of immune system process	447/20514	1.94e-16	2.19e-14	1.47e-14	Ifi207/Fcgr2b/C1qc/Milr1/Ccr1/Trem2/Inpp5d/Tyrobp/Laptm5/Lilrb4b/Nfkbid/Ptprc/Cd84/Fcer1g/Cx3cr1/Nckap1l/Spi1/Cd86/Cd68/Lyn/Vsir/Mafb/Ptpn6/Lgals9/Lpxn/Abr/Plcl2/Ptprj/Il4ra/Gal	30
Immune_reactive	GO:1903131	mononuclear cell differentiation	486/20514	2.42e-16	2.64e-14	1.78e-14	Ifi207/Trem2/Vav1/Inpp5d/Cd83/Syk/Laptm5/Lilrb4b/Nfkbid/Ptprc/Dock2/Ikzf1/Fcer1g/Nckap1l/Spi1/Lyn/Irf8/Mef2c/Vsir/Pou2f2/Mafb/Ptpn6/Lgals9/Tcirg1/Plcl2/Sh2b3/Ptk2b/Ptprj/Il4ra/Tgfbr2/Dock10	31
Immune_reactive	GO:1902105	regulation of leukocyte differentiation	322/20514	2.76e-16	2.92e-14	1.96e-14	Csf1r/C1qc/Itgam/Ccr1/Trem2/Inpp5d/Cd83/Tyrobp/Syk/Lilrb4b/Nfkbid/Ptprc/Ikzf1/Hcls1/Nckap1l/Rassf2/Lyn/Vsir/Mafb/Ptpn6/Mitf/Lgals9/Casp8/Sh2b3/Il4ra/Tgfbr2	26
Immune_reactive	GO:0070663	regulation of leukocyte proliferation	267/20514	3.68e-16	3.76e-14	2.53e-14	Csf2rb2/Fcgr2b/Rac2/Csf1r/Inpp5d/Tyrobp/Csf2rb/Syk/Laptm5/Lilrb4b/Ptprc/Nckap1l/Cd86/Pycard/Lyn/Mef2c/Vsir/Ptpn6/Lgals9/Tlr4/Tgfbr2/Gal/Tnfrsf1b/Csf2ra	24
Immune_reactive	GO:0042113	B cell activation	305/20514	7.56e-16	7.47e-14	5.03e-14	Fcgr2b/Inpp5d/Tyrobp/Syk/Blnk/Laptm5/Ptprc/Ikzf1/Nckap1l/Spi1/Cd86/Cd180/Lyn/Irf8/Mef2c/Pou2f2/Ptpn6/Tcirg1/Prkcb/Plcl2/Tlr4/Ptk2b/Ptprj/Dock10/Prkcd	25
Immune_reactive	GO:0050853	B cell receptor signaling pathway	49/20514	1.47e-15	1.41e-13	9.47e-14	Klhl6/Syk/Blnk/Ptprc/Nckap1l/Prkch/Tec/Lyn/Mef2c/Ptpn6/Prkcb/Lpxn/Plcl2	13
Immune_reactive	GO:0002444	myeloid leukocyte mediated immunity	121/20514	5.29e-15	4.92e-13	3.31e-13	Rac2/Milr1/Itgam/Tyrobp/Syk/Myo1f/Cd84/Fcer1g/Fcgr3/Cx3cr1/Ncf1/Spi1/Itgb2/Lyn/Abr/Pld2/Il4ra	17
Immune_reactive	GO:0002886	regulation of myeloid leukocyte mediated immunity	69/20514	6.92e-15	6.26e-13	4.21e-13	Rac2/Itgam/Tyrobp/Syk/Cd84/Fcer1g/Fcgr3/Cx3cr1/Spi1/Itgb2/Lyn/Abr/Pld2/Il4ra	14
Immune_reactive	GO:0050866	negative regulation of cell activation	224/20514	1.23e-14	1.08e-12	7.24e-13	Fcgr2b/Milr1/Trem2/Inpp5d/Tyrobp/Laptm5/Lilrb4b/Nfkbid/Cd84/Nckap1l/Spi1/Cd86/Lyn/Vsir/Ptpn6/Lgals9/Abr/Sh2b3/Il4ra/Gal/Prkcd	21
Immune_reactive	GO:0050851	antigen receptor-mediated signaling pathway	173/20514	1.3e-14	1.11e-12	7.48e-13	Lcp2/Klhl6/Fyb/Syk/Blnk/Laptm5/Lilrb4b/Nfkbid/Ptprc/Nckap1l/Prkch/Tec/Lyn/Mef2c/Ptpn6/Prkcb/Lpxn/Plcl2/Ptprj	19
Immune_reactive	GO:0030595	leukocyte chemotaxis	226/20514	1.46e-14	1.22e-12	8.2e-13	Rac2/C3ar1/Csf1r/Itgam/Ccr1/Vav1/Syk/Fcer1g/Fcgr3/Cx3cr1/Nckap1l/Spi1/Itgb2/Pla2g7/Lyn/Hrh1/Spp1/Cxcl16/Lgmn/Ptk2b/Ptprj	21
Immune_reactive	GO:0016064	immunoglobulin mediated immune response	153/20514	1.97e-14	1.6e-12	1.08e-12	Csf2rb2/Fcgr2b/Il21r/C1qb/C1qc/C1qa/Trem2/Inpp5d/Csf2rb/Ptprc/Fcer1g/Fcgr3/Pou2f2/Ptpn6/Tcirg1/Cfh/Il4ra/Prkcd	18
Immune_reactive	GO:0043300	regulation of leukocyte degranulation	59/20514	2.07e-14	1.64e-12	1.1e-12	Rac2/Itgam/Syk/Cd84/Fcer1g/Nckap1l/Spi1/Itgb2/Lyn/Lgals9/Abr/Pld2/Il4ra	13
Immune_reactive	GO:0043299	leukocyte degranulation	93/20514	2.69e-14	2.07e-12	1.39e-12	Rac2/Milr1/Itgam/Syk/Myo1f/Cd84/Fcer1g/Nckap1l/Spi1/Itgb2/Lyn/Lgals9/Abr/Pld2/Il4ra	15
Immune_reactive	GO:0019724	B cell mediated immunity	156/20514	2.78e-14	2.09e-12	1.41e-12	Csf2rb2/Fcgr2b/Il21r/C1qb/C1qc/C1qa/Trem2/Inpp5d/Csf2rb/Ptprc/Fcer1g/Fcgr3/Pou2f2/Ptpn6/Tcirg1/Cfh/Il4ra/Prkcd	18
Immune_reactive	GO:0050867	positive regulation of cell activation	391/20514	2.86e-14	2.1e-12	1.41e-12	Itgam/Trem2/Inpp5d/Cd83/Tyrobp/Syk/Lilrb4b/Nfkbid/Ptprc/Ikzf1/Fcer1g/Dock8/Nckap1l/Itgb2/Cd86/Pycard/Mef2c/Vsir/Lgals9/Plek/Pld2/Tlr4/Ptprj/Il4ra/Tgfbr2/Sirpa	26
Immune_reactive	GO:0032680	regulation of tumor necrosis factor production	185/20514	4.48e-14	3.22e-12	2.17e-12	Trem2/Cd33/Tyrobp/Syk/Lilrb4b/Ptprc/Cd84/Fcer1g/Fcgr3/Cx3cr1/Pycard/Lpl/Vsir/Ptpn6/Lgals9/Tlr4/Ptprj/Sirpa/Cyba	19
Immune_reactive	GO:0030098	lymphocyte differentiation	438/20514	5.51e-14	3.87e-12	2.61e-12	Vav1/Inpp5d/Cd83/Syk/Laptm5/Lilrb4b/Nfkbid/Ptprc/Dock2/Ikzf1/Fcer1g/Nckap1l/Spi1/Irf8/Vsir/Pou2f2/Mafb/Ptpn6/Lgals9/Tcirg1/Plcl2/Sh2b3/Ptk2b/Ptprj/Il4ra/Tgfbr2/Dock10	27
Immune_reactive	GO:1903555	regulation of tumor necrosis factor superfamily cytokine production	188/20514	6.02e-14	4.14e-12	2.79e-12	Trem2/Cd33/Tyrobp/Syk/Lilrb4b/Ptprc/Cd84/Fcer1g/Fcgr3/Cx3cr1/Pycard/Lpl/Vsir/Ptpn6/Lgals9/Tlr4/Ptprj/Sirpa/Cyba	19
Immune_reactive	GO:1902107	positive regulation of leukocyte differentiation	189/20514	6.64e-14	4.38e-12	2.94e-12	Csf1r/Itgam/Ccr1/Trem2/Inpp5d/Cd83/Tyrobp/Syk/Lilrb4b/Nfkbid/Ptprc/Ikzf1/Hcls1/Nckap1l/Vsir/Lgals9/Casp8/Il4ra/Tgfbr2	19
Immune_reactive	GO:1903708	positive regulation of hemopoiesis	189/20514	6.64e-14	4.38e-12	2.94e-12	Csf1r/Itgam/Ccr1/Trem2/Inpp5d/Cd83/Tyrobp/Syk/Lilrb4b/Nfkbid/Ptprc/Ikzf1/Hcls1/Nckap1l/Vsir/Lgals9/Casp8/Il4ra/Tgfbr2	19
Immune_reactive	GO:0032640	tumor necrosis factor production	191/20514	8.05e-14	5.2e-12	3.49e-12	Trem2/Cd33/Tyrobp/Syk/Lilrb4b/Ptprc/Cd84/Fcer1g/Fcgr3/Cx3cr1/Pycard/Lpl/Vsir/Ptpn6/Lgals9/Tlr4/Ptprj/Sirpa/Cyba	19
Immune_reactive	GO:0032944	regulation of mononuclear cell proliferation	247/20514	8.56e-14	5.42e-12	3.64e-12	Fcgr2b/Rac2/Csf1r/Inpp5d/Tyrobp/Syk/Laptm5/Lilrb4b/Ptprc/Nckap1l/Cd86/Pycard/Lyn/Mef2c/Vsir/Ptpn6/Lgals9/Tlr4/Tgfbr2/Gal/Tnfrsf1b	21
Immune_reactive	GO:0032613	interleukin-10 production	66/20514	9.84e-14	6.11e-12	4.11e-12	Fcgr2b/Trem2/Cd83/Tyrobp/Syk/Lilrb4b/Cd84/Fcer1g/Pycard/Vsir/Lgals9/Tlr4/Prkcd	13
Immune_reactive	GO:0032612	interleukin-1 production	122/20514	1.04e-13	6.31e-12	4.24e-12	Ifi207/Nlrc4/Trem2/Cd33/Tyrobp/Lilrb4b/Cx3cr1/Pycard/P2rx7/Lpl/Aim2/Lgals9/Casp8/Tnfaip8/Tlr4/Sirpa	16
Immune_reactive	GO:0071706	tumor necrosis factor superfamily cytokine production	194/20514	1.07e-13	6.39e-12	4.29e-12	Trem2/Cd33/Tyrobp/Syk/Lilrb4b/Ptprc/Cd84/Fcer1g/Fcgr3/Cx3cr1/Pycard/Lpl/Vsir/Ptpn6/Lgals9/Tlr4/Ptprj/Sirpa/Cyba	19
Immune_reactive	GO:0032611	interleukin-1 beta production	102/20514	1.11e-13	6.5e-12	4.37e-12	Ifi207/Nlrc4/Trem2/Cd33/Tyrobp/Lilrb4b/Cx3cr1/Pycard/P2rx7/Lpl/Aim2/Casp8/Tnfaip8/Tlr4/Sirpa	15
Immune_reactive	GO:0045637	regulation of myeloid cell differentiation	222/20514	1.15e-13	6.62e-12	4.45e-12	Csf1r/C1qc/Itgam/Ccr1/Trem2/Inpp5d/Tyrobp/Lilrb4b/Ikzf1/Hcls1/Nckap1l/Spi1/Rassf2/Lyn/Mef2c/Mafb/Mitf/Casp8/Ptk2b/Rab7b	20
Immune_reactive	GO:0002237	response to molecule of bacterial origin	387/20514	1.78e-13	1e-11	6.76e-12	Fcgr4/Fcgr2b/Slc11a1/Trem2/Cd84/Tnfrsf11a/Ly86/Cx3cr1/Spi1/Cd86/Pycard/Cd68/P2rx7/Cd180/Lyn/Irf5/Irf8/Mef2c/Cxcl16/Lgals9/Cfh/Abr/Tlr4/Tnfrsf1b/Sirpa	25
Immune_reactive	GO:0002699	positive regulation of immune effector process	295/20514	3.11e-13	1.73e-11	1.16e-11	Rac2/Itgam/Trem2/Vav1/Tyrobp/Syk/Laptm5/Nfkbid/Ptprc/Cd84/Fcer1g/Fcgr3/Spi1/Itgb2/Cd86/P2rx7/Lyn/Ptpn6/Pld2/Tlr4/Ptprj/Il4ra	22
Immune_reactive	GO:0045576	mast cell activation	92/20514	4.6e-13	2.51e-11	1.69e-11	Rac2/Lcp2/Milr1/Syk/Lilrb4b/Cd84/Cd48/Fcer1g/Fcgr3/Lyn/Ptpn6/Pld2/Tlr4/Il4ra	14
Immune_reactive	GO:0051249	regulation of lymphocyte activation	481/20514	5.13e-13	2.75e-11	1.85e-11	Fcgr2b/Rac2/Inpp5d/Cd83/Tyrobp/Syk/Laptm5/Lilrb4b/Nfkbid/Ptprc/Ikzf1/Dock8/Nckap1l/Cd86/Pycard/Lyn/Mef2c/Vsir/Ptpn6/Lgals9/Tlr4/Sh2b3/Il4ra/Tgfbr2/Gal/Tnfrsf1b/Sirpa	27
Immune_reactive	GO:0030168	platelet activation	93/20514	5.37e-13	2.82e-11	1.89e-11	Syk/Fcer1g/Entpd1/Tec/Fermt3/Lyn/Ptpn6/Plek/Cfh/P2ry12/Tlr4/Sh2b3/Ptprj/Prkcd	14
Immune_reactive	GO:0002696	positive regulation of leukocyte activation	371/20514	5.43e-13	2.82e-11	1.89e-11	Itgam/Trem2/Inpp5d/Cd83/Tyrobp/Syk/Lilrb4b/Nfkbid/Ptprc/Ikzf1/Fcer1g/Dock8/Nckap1l/Itgb2/Cd86/Pycard/Mef2c/Vsir/Lgals9/Pld2/Tlr4/Il4ra/Tgfbr2/Sirpa	24
Immune_reactive	GO:0050764	regulation of phagocytosis	114/20514	5.96e-13	3.04e-11	2.04e-11	Fcgr2b/Slc11a1/Trem2/Syk/Ptprc/Dock2/Fcer1g/Fcgr3/Nckap1l/Pycard/Hck/Abr/Ptprj/Sirpa/Cyba	15
Immune_reactive	GO:0050670	regulation of lymphocyte proliferation	243/20514	6.31e-13	3.17e-11	2.13e-11	Fcgr2b/Rac2/Inpp5d/Tyrobp/Syk/Laptm5/Lilrb4b/Ptprc/Nckap1l/Cd86/Pycard/Lyn/Mef2c/Vsir/Ptpn6/Lgals9/Tlr4/Tgfbr2/Gal/Tnfrsf1b	20
Immune_reactive	GO:0032652	regulation of interleukin-1 production	116/20514	7.73e-13	3.82e-11	2.57e-11	Ifi207/Nlrc4/Trem2/Cd33/Tyrobp/Lilrb4b/Cx3cr1/Pycard/P2rx7/Lpl/Aim2/Lgals9/Casp8/Tlr4/Sirpa	15
Immune_reactive	GO:0032651	regulation of interleukin-1 beta production	96/20514	8.44e-13	4.11e-11	2.76e-11	Ifi207/Nlrc4/Trem2/Cd33/Tyrobp/Lilrb4b/Cx3cr1/Pycard/P2rx7/Lpl/Aim2/Casp8/Tlr4/Sirpa	14
Immune_reactive	GO:0019221	cytokine-mediated signaling pathway	416/20514	8.9e-13	4.27e-11	2.87e-11	Il10ra/Csf2rb2/Il21r/Csf1r/Ccr1/Trem2/Csf2rb/Syk/Laptm5/Ptprc/Tnfrsf11a/Fcer1g/Cx3cr1/Spi1/Pycard/Irf5/Aim2/Ptpn6/Ikbke/Il10rb/St18/Sh2b3/Ptk2b/Il4ra/Csf2ra	25
Immune_reactive	GO:0007159	leukocyte cell-cell adhesion	381/20514	9.62e-13	4.48e-11	3.01e-11	Rac2/Itgam/Cd83/Syk/Laptm5/Lilrb4b/Nfkbid/Ptprc/Ikzf1/Dock8/Cx3cr1/Nckap1l/Itgb2/Cd86/Pycard/Selplg/Fermt3/Vsir/Ptpn6/Lgals9/Cfh/Il4ra/Tgfbr2/Sirpa	24
Immune_reactive	GO:0060326	cell chemotaxis	312/20514	9.62e-13	4.48e-11	3.01e-11	Rac2/C3ar1/Csf1r/Itgam/Ccr1/Vav1/Syk/Fcer1g/Fcgr3/Cx3cr1/Nckap1l/Spi1/Itgb2/Pla2g7/Lyn/Hrh1/Spp1/Cxcl16/Lgmn/Ptk2b/Ptprj/Prkcd	22
Immune_reactive	GO:0042098	T cell proliferation	226/20514	1.68e-12	7.58e-11	5.1e-11	Rac2/Slc11a1/Itgam/Syk/Laptm5/Lilrb4b/Ptprc/Dock2/Dock8/Nckap1l/Itgb2/Cd86/Pycard/P2rx7/Vsir/Ptpn6/Lgals9/Tgfbr2/Tnfrsf1b	19
Immune_reactive	GO:0032653	regulation of interleukin-10 production	64/20514	1.68e-12	7.58e-11	5.1e-11	Fcgr2b/Trem2/Cd83/Tyrobp/Syk/Lilrb4b/Cd84/Fcer1g/Pycard/Vsir/Lgals9/Tlr4	12
Immune_reactive	GO:0050766	positive regulation of phagocytosis	83/20514	2.19e-12	9.77e-11	6.57e-11	Fcgr2b/Slc11a1/Trem2/Ptprc/Dock2/Fcer1g/Fcgr3/Nckap1l/Pycard/Abr/Ptprj/Sirpa/Cyba	13
Immune_reactive	GO:0031349	positive regulation of defense response	293/20514	2.38e-12	1.05e-10	7.03e-11	Ifi207/Pik3cg/Clec4n/Nlrc4/Ctss/Trem2/Vav1/Tyrobp/Syk/Tnfrsf11a/Fcer1g/Fcgr3/Spi1/Pycard/Lpl/Mef2c/Aim2/Lgals9/Ikbke/Tlr4/Cyba	21
Immune_reactive	GO:0002695	negative regulation of leukocyte activation	202/20514	2.47e-12	1.07e-10	7.19e-11	Fcgr2b/Milr1/Inpp5d/Tyrobp/Laptm5/Lilrb4b/Nfkbid/Cd84/Nckap1l/Spi1/Cd86/Lyn/Vsir/Ptpn6/Lgals9/Abr/Il4ra/Gal	18
Immune_reactive	GO:0032496	response to lipopolysaccharide	366/20514	3.1e-12	1.33e-10	8.91e-11	Fcgr4/Slc11a1/Trem2/Cd84/Tnfrsf11a/Ly86/Cx3cr1/Spi1/Cd86/Pycard/Cd68/P2rx7/Cd180/Lyn/Irf8/Mef2c/Cxcl16/Lgals9/Cfh/Abr/Tlr4/Tnfrsf1b/Sirpa	23
Immune_reactive	GO:0042119	neutrophil activation	39/20514	4.34e-12	1.83e-10	1.23e-10	Fcgr4/Itgam/Tyrobp/Syk/Myo1f/Fcer1g/Spi1/Itgb2/Abr/Prkcd	10
Immune_reactive	GO:0032755	positive regulation of interleukin-6 production	108/20514	4.43e-12	1.85e-10	1.24e-10	Tyrobp/Syk/Laptm5/Fcer1g/Tlr7/Pycard/P2rx7/Unc93b1/Lpl/Pou2f2/Lgals9/Tlr4/Cyba/Rab7b	14
Immune_reactive	GO:0002687	positive regulation of leukocyte migration	156/20514	4.95e-12	2.03e-10	1.37e-10	Rac2/C3ar1/Csf1r/Ccr1/Trem2/Dock8/Cx3cr1/Nckap1l/Spi1/Pycard/Pla2g7/Lgals9/Lgmn/P2ry12/Ptk2b/Ptprj	16
Immune_reactive	GO:0002761	regulation of myeloid leukocyte differentiation	139/20514	1.12e-11	4.54e-10	3.05e-10	Csf1r/C1qc/Itgam/Ccr1/Trem2/Inpp5d/Tyrobp/Lilrb4b/Ikzf1/Hcls1/Rassf2/Lyn/Mafb/Mitf/Casp8	15
Immune_reactive	GO:0002819	regulation of adaptive immune response	225/20514	1.52e-11	6.1e-10	4.1e-10	Fcgr2b/Slc11a1/Clec4n/Trem2/Lilrb4b/Nfkbid/Ptprc/Cd48/Fcer1g/Fcgr3/Nckap1l/Pycard/P2rx7/Mef2c/Vsir/Ptpn6/Il4ra/Tnfrsf1b	18
Immune_reactive	GO:0002685	regulation of leukocyte migration	226/20514	1.64e-11	6.49e-10	4.36e-10	Rac2/C3ar1/Csf1r/Ccr1/Trem2/Dock8/Cx3cr1/Nckap1l/Spi1/Pycard/Pla2g7/Lyn/Lgals9/Lgmn/Abr/P2ry12/Ptk2b/Ptprj	18
Immune_reactive	GO:0007229	integrin-mediated signaling pathway	97/20514	1.71e-11	6.59e-10	4.43e-10	Fyb/Itgam/Vav1/Tyrobp/Syk/Fcer1g/Itgb2/Tec/Fermt3/Itgax/Dab2/Plek/Ptk2b	13
Immune_reactive	GO:0002283	neutrophil activation involved in immune response	21/20514	1.71e-11	6.59e-10	4.43e-10	Itgam/Tyrobp/Syk/Myo1f/Fcer1g/Spi1/Itgb2/Abr	8
Immune_reactive	GO:0036230	granulocyte activation	45/20514	2.06e-11	7.87e-10	5.29e-10	Fcgr4/Itgam/Tyrobp/Syk/Myo1f/Fcer1g/Spi1/Itgb2/Abr/Prkcd	10
Immune_reactive	GO:0045785	positive regulation of cell adhesion	481/20514	2.11e-11	7.95e-10	5.35e-10	Vav1/Cd83/Syk/Lilrb4b/Nfkbid/Ptprc/Ikzf1/Dock8/Nckap1l/Itgb2/Cd86/Pycard/Apbb1ip/Spp1/Vsir/Dab2/Ptpn6/Lgals9/P2ry12/Pld2/Ptk2b/Ptprj/Il4ra/Tgfbr2/Sirpa	25
Immune_reactive	GO:0002831	regulation of response to biotic stimulus	365/20514	2.14e-11	7.96e-10	5.35e-10	Ifi207/Clec4n/Nlrc4/Ccr1/Trem2/Vav1/Tyrobp/Syk/Myo1f/Cd84/Ly86/Ncf1/Spi1/Pycard/Cd180/Aim2/Lgals9/Casp8/Ikbke/Cfh/Tlr4/Cyba	22
Immune_reactive	GO:0001818	negative regulation of cytokine production	296/20514	2.37e-11	8.74e-10	5.87e-10	Fcgr2b/Slc11a1/Trem2/Cd33/Inpp5d/Cd83/Tyrobp/Laptm5/Lilrb4b/Ptprc/Cd84/Cx3cr1/Srgn/Nckap1l/Pycard/Vsir/Ptpn6/Lgals9/Tlr4/Sirpa	20
Immune_reactive	GO:0045088	regulation of innate immune response	238/20514	3.88e-11	1.41e-09	9.49e-10	Ifi207/Clec4n/Nlrc4/Ccr1/Trem2/Vav1/Tyrobp/Syk/Myo1f/Ncf1/Spi1/Pycard/Aim2/Lgals9/Casp8/Ikbke/Cfh/Tlr4	18
Immune_reactive	GO:0006911	phagocytosis, engulfment	64/20514	3.94e-11	1.42e-09	9.53e-10	Fcgr2b/Arhgap25/Rac2/Itgam/Trem2/Msr1/Fcer1g/Fcgr3/Nckap1l/Itgb2/Sirpa	11
Immune_reactive	GO:0046849	bone remodeling	104/20514	4.21e-11	1.5e-09	1.01e-09	Fcgr4/Rac2/Csf1r/Ctss/Inpp5d/Syk/Tnfrsf11a/Rassf2/P2rx7/Spp1/Mitf/Tcirg1/Ptk2b	13
Immune_reactive	GO:0071216	cellular response to biotic stimulus	323/20514	1.13e-10	3.99e-09	2.68e-09	Fcgr4/Fcgr2b/Trem2/Syk/Cd84/Ly86/Cx3cr1/Spi1/Cd86/Pycard/Cd68/Cd180/Lyn/Irf8/Mef2c/Cxcl16/Cfh/Tlr4/Tnfrsf1b/Sirpa	20
Immune_reactive	GO:0042742	defense response to bacterium	328/20514	1.49e-10	5.18e-09	3.49e-09	Mpeg1/Slc11a1/Nlrc4/Trem2/Syk/Myo1f/Lyz2/Fcer1g/Stab1/Ncf1/Pycard/Gbp8/P2rx7/Hck/Irf8/Lgals9/Tnfaip8/Tlr4/Cyba/Prkcd	20
Immune_reactive	GO:0099024	plasma membrane invagination	73/20514	1.74e-10	6e-09	4.03e-09	Fcgr2b/Arhgap25/Rac2/Itgam/Trem2/Msr1/Fcer1g/Fcgr3/Nckap1l/Itgb2/Sirpa	11
Immune_reactive	GO:0098883	synapse pruning	10/20514	1.99e-10	6.78e-09	4.56e-09	C1qb/C1qc/C1qa/Itgam/Trem2/Cx3cr1	6
Immune_reactive	GO:0071219	cellular response to molecule of bacterial origin	298/20514	2.06e-10	6.95e-09	4.67e-09	Fcgr4/Fcgr2b/Trem2/Cd84/Ly86/Cx3cr1/Spi1/Cd86/Pycard/Cd68/Cd180/Lyn/Irf8/Mef2c/Cxcl16/Cfh/Tlr4/Tnfrsf1b/Sirpa	19
Immune_reactive	GO:0071675	regulation of mononuclear cell migration	118/20514	2.12e-10	7.05e-09	4.74e-09	C3ar1/Csf1r/Ccr1/Dock8/Cx3cr1/Spi1/Pycard/Pla2g7/Lyn/Lgals9/Lgmn/Ptk2b/Ptprj	13
Immune_reactive	GO:0030183	B cell differentiation	171/20514	2.19e-10	7.23e-09	4.87e-09	Inpp5d/Syk/Laptm5/Ptprc/Ikzf1/Nckap1l/Spi1/Irf8/Pou2f2/Ptpn6/Tcirg1/Plcl2/Ptk2b/Ptprj/Dock10	15
Immune_reactive	GO:0002704	negative regulation of leukocyte mediated immunity	75/20514	2.36e-10	7.69e-09	5.17e-09	Fcgr2b/Lilrb4b/Ptprc/Cd84/Cx3cr1/Nckap1l/Spi1/Vsir/Ptpn6/Lgals9/Abr	11
Immune_reactive	GO:0051251	positive regulation of lymphocyte activation	308/20514	3.61e-10	1.17e-08	7.84e-09	Inpp5d/Cd83/Tyrobp/Syk/Lilrb4b/Nfkbid/Ptprc/Ikzf1/Dock8/Nckap1l/Cd86/Pycard/Mef2c/Vsir/Lgals9/Tlr4/Il4ra/Tgfbr2/Sirpa	19
Immune_reactive	GO:0045453	bone resorption	78/20514	3.65e-10	1.17e-08	7.84e-09	Fcgr4/Rac2/Csf1r/Ctss/Inpp5d/Syk/Tnfrsf11a/P2rx7/Spp1/Tcirg1/Ptk2b	11
Immune_reactive	GO:0050863	regulation of T cell activation	346/20514	3.82e-10	1.21e-08	8.13e-09	Rac2/Cd83/Syk/Laptm5/Lilrb4b/Nfkbid/Ptprc/Ikzf1/Dock8/Nckap1l/Cd86/Pycard/Vsir/Ptpn6/Lgals9/Sh2b3/Il4ra/Tgfbr2/Tnfrsf1b/Sirpa	20
Immune_reactive	GO:0022407	regulation of cell-cell adhesion	466/20514	3.9e-10	1.22e-08	8.22e-09	Cd83/Syk/Laptm5/Lilrb4b/Nfkbid/Ptprc/Ikzf1/Dock8/Nckap1l/Spi1/Itgb2/Cd86/Pycard/Fermt3/Lyn/Vsir/Ptpn6/Lgals9/Sh2b3/Il4ra/Tgfbr2/Sirpa/Prkcd	23
Immune_reactive	GO:0002822	regulation of adaptive immune response based on somatic recombination of immune receptors built from immunoglobulin superfamily domains	209/20514	4.11e-10	1.27e-08	8.57e-09	Fcgr2b/Slc11a1/Clec4n/Trem2/Lilrb4b/Nfkbid/Ptprc/Fcer1g/Fcgr3/Nckap1l/P2rx7/Mef2c/Vsir/Ptpn6/Il4ra/Tnfrsf1b	16
Immune_reactive	GO:0071621	granulocyte chemotaxis	126/20514	4.84e-10	1.49e-08	1e-08	Rac2/C3ar1/Csf1r/Itgam/Vav1/Syk/Fcer1g/Fcgr3/Nckap1l/Itgb2/Hrh1/Spp1/Ptprj	13
Immune_reactive	GO:0071674	mononuclear cell migration	182/20514	5.28e-10	1.61e-08	1.08e-08	C3ar1/Csf1r/Ccr1/Dock8/Cx3cr1/Spi1/Pycard/Pla2g7/Lyn/Cxcl16/Lgals9/Lgmn/Ptk2b/Ptprj/Sirpa	15
Immune_reactive	GO:0010324	membrane invagination	81/20514	5.54e-10	1.67e-08	1.12e-08	Fcgr2b/Arhgap25/Rac2/Itgam/Trem2/Msr1/Fcer1g/Fcgr3/Nckap1l/Itgb2/Sirpa	11
Immune_reactive	GO:1903305	regulation of regulated secretory pathway	183/20514	5.7e-10	1.7e-08	1.14e-08	Rac2/Itgam/Syk/Cd84/Fcer1g/Nckap1l/Spi1/Itgb2/P2rx7/Lyn/Lgals9/Prkcb/Abr/Pld2/Il4ra	15
Immune_reactive	GO:0045055	regulated exocytosis	281/20514	5.85e-10	1.73e-08	1.16e-08	Rac2/Milr1/Itgam/Syk/Myo1f/Cd84/Fcer1g/Nckap1l/Spi1/Itgb2/P2rx7/Lyn/Lgals9/Plek/Prkcb/Abr/Pld2/Il4ra	18
Immune_reactive	GO:0097530	granulocyte migration	156/20514	6.6e-10	1.93e-08	1.3e-08	Rac2/C3ar1/Csf1r/Itgam/Vav1/Syk/Fcer1g/Fcgr3/Nckap1l/Itgb2/Hrh1/Spp1/Ptprj/Sirpa	14
Immune_reactive	GO:0050777	negative regulation of immune response	188/20514	8.3e-10	2.41e-08	1.62e-08	Ifi207/Fcgr2b/Ccr1/Trem2/Inpp5d/Lilrb4b/Ptprc/Cd84/Nckap1l/Spi1/Vsir/Ptpn6/Lgals9/Abr/Il4ra	15
Immune_reactive	GO:0071222	cellular response to lipopolysaccharide	288/20514	8.69e-10	2.5e-08	1.68e-08	Fcgr4/Trem2/Cd84/Ly86/Cx3cr1/Spi1/Cd86/Pycard/Cd68/Cd180/Lyn/Irf8/Mef2c/Cxcl16/Cfh/Tlr4/Tnfrsf1b/Sirpa	18
Immune_reactive	GO:0010543	regulation of platelet activation	47/20514	8.91e-10	2.53e-08	1.7e-08	Syk/Fcer1g/Tec/Lyn/Plek/Tlr4/Sh2b3/Ptprj/Prkcd	9
Immune_reactive	GO:0002833	positive regulation of response to biotic stimulus	189/20514	8.94e-10	2.53e-08	1.7e-08	Ifi207/Clec4n/Nlrc4/Vav1/Tyrobp/Syk/Ly86/Spi1/Pycard/Cd180/Aim2/Lgals9/Ikbke/Tlr4/Cyba	15
Immune_reactive	GO:0002285	lymphocyte activation involved in immune response	222/20514	9.96e-10	2.79e-08	1.88e-08	Slc11a1/Nfkbid/Ptprc/Fcer1g/Nckap1l/Spi1/Apbb1ip/Lcp1/Cd180/Irf8/Lgals9/Plcl2/Tlr4/Ptk2b/Il4ra/Dock10	16
Immune_reactive	GO:0032760	positive regulation of tumor necrosis factor production	109/20514	1.08e-09	2.99e-08	2.01e-08	Tyrobp/Syk/Ptprc/Cd84/Fcer1g/Fcgr3/Pycard/Lpl/Lgals9/Tlr4/Ptprj/Cyba	12
Immune_reactive	GO:0050854	regulation of antigen receptor-mediated signaling pathway	66/20514	1.14e-09	3.13e-08	2.1e-08	Laptm5/Lilrb4b/Ptprc/Prkch/Lyn/Ptpn6/Prkcb/Lpxn/Plcl2/Ptprj	10
Immune_reactive	GO:0006887	exocytosis	409/20514	1.17e-09	3.19e-08	2.15e-08	Rac2/Milr1/Itgam/Ccr1/Syk/Myo1f/Cd84/Fcer1g/Nckap1l/Spi1/Itgb2/P2rx7/Lyn/Hck/Lgals9/Plek/Prkcb/Abr/Pld2/Il4ra/Rab3il1	21
Immune_reactive	GO:1903557	positive regulation of tumor necrosis factor superfamily cytokine production	111/20514	1.33e-09	3.6e-08	2.42e-08	Tyrobp/Syk/Ptprc/Cd84/Fcer1g/Fcgr3/Pycard/Lpl/Lgals9/Tlr4/Ptprj/Cyba	12
Immune_reactive	GO:0032642	regulation of chemokine production	112/20514	1.48e-09	3.96e-08	2.67e-08	Csf1r/Trem2/Syk/Lilrb4b/Cd84/Tlr7/Pycard/Lpl/Lgals9/Tlr4/Il4ra/Sirpa	12
Immune_reactive	GO:0030217	T cell differentiation	299/20514	1.58e-09	4.2e-08	2.83e-08	Vav1/Cd83/Syk/Lilrb4b/Nfkbid/Ptprc/Dock2/Ikzf1/Fcer1g/Nckap1l/Spi1/Vsir/Mafb/Lgals9/Tcirg1/Sh2b3/Il4ra/Tgfbr2	18
Immune_reactive	GO:0001906	cell killing	230/20514	1.67e-09	4.4e-08	2.96e-08	Itgam/Vav1/Tyrobp/Syk/Ptprc/Lyz2/Fcgr3/Cx3cr1/Nckap1l/Ncf1/Spi1/P2rx7/Ptpn6/Lgals9/Cfh/Ctsh	16
Immune_reactive	GO:0051250	negative regulation of lymphocyte activation	170/20514	2.04e-09	5.35e-08	3.6e-08	Fcgr2b/Inpp5d/Tyrobp/Laptm5/Lilrb4b/Nfkbid/Nckap1l/Cd86/Lyn/Vsir/Ptpn6/Lgals9/Il4ra/Gal	14
Immune_reactive	GO:0050672	negative regulation of lymphocyte proliferation	92/20514	2.23e-09	5.77e-08	3.88e-08	Fcgr2b/Inpp5d/Tyrobp/Laptm5/Lilrb4b/Cd86/Lyn/Vsir/Ptpn6/Lgals9/Gal	11
Immune_reactive	GO:0048771	tissue remodeling	202/20514	2.24e-09	5.77e-08	3.88e-08	Fcgr4/Rac2/Csf1r/Ctss/Inpp5d/Syk/Tnfrsf11a/Rassf2/P2rx7/Spp1/Mef2c/Mitf/Tcirg1/Abr/Ptk2b	15
Immune_reactive	GO:0032945	negative regulation of mononuclear cell proliferation	93/20514	2.5e-09	6.39e-08	4.3e-08	Fcgr2b/Inpp5d/Tyrobp/Laptm5/Lilrb4b/Cd86/Lyn/Vsir/Ptpn6/Lgals9/Gal	11
Immune_reactive	GO:0007596	blood coagulation	173/20514	2.57e-09	6.5e-08	4.37e-08	Syk/Fcer1g/Entpd1/Tec/Fermt3/Lyn/Ptpn6/Plek/Cfh/P2ry12/Tlr4/Sh2b3/Ptprj/Prkcd	14
Immune_reactive	GO:0032732	positive regulation of interleukin-1 production	72/20514	2.74e-09	6.88e-08	4.63e-08	Ifi207/Nlrc4/Tyrobp/Pycard/P2rx7/Lpl/Aim2/Lgals9/Casp8/Tlr4	10
Immune_reactive	GO:0032602	chemokine production	119/20514	2.99e-09	7.44e-08	5e-08	Csf1r/Trem2/Syk/Lilrb4b/Cd84/Tlr7/Pycard/Lpl/Lgals9/Tlr4/Il4ra/Sirpa	12
Immune_reactive	GO:0002532	production of molecular mediator involved in inflammatory response	95/20514	3.15e-09	7.79e-08	5.24e-08	Trem2/Syk/Lilrb4b/Fcer1g/Ncf1/Pld4/Pycard/Lyn/Tlr4/Il4ra/Sirpa	11
Immune_reactive	GO:0007599	hemostasis	176/20514	3.21e-09	7.82e-08	5.26e-08	Syk/Fcer1g/Entpd1/Tec/Fermt3/Lyn/Ptpn6/Plek/Cfh/P2ry12/Tlr4/Sh2b3/Ptprj/Prkcd	14
Immune_reactive	GO:0050817	coagulation	176/20514	3.21e-09	7.82e-08	5.26e-08	Syk/Fcer1g/Entpd1/Tec/Fermt3/Lyn/Ptpn6/Plek/Cfh/P2ry12/Tlr4/Sh2b3/Ptprj/Prkcd	14
Immune_reactive	GO:0070527	platelet aggregation	54/20514	3.27e-09	7.88e-08	5.3e-08	Syk/Fermt3/Lyn/Ptpn6/Plek/Cfh/P2ry12/Sh2b3/Prkcd	9
Immune_reactive	GO:0030316	osteoclast differentiation	120/20514	3.29e-09	7.88e-08	5.3e-08	Csf1r/Ccr1/Trem2/Inpp5d/Tyrobp/Lilrb4b/Tnfrsf11a/Fcer1g/Rassf2/Mafb/Mitf/Tcirg1	12
Immune_reactive	GO:0072593	reactive oxygen species metabolic process	242/20514	3.48e-09	8.28e-08	5.57e-08	Xdh/Itgam/Vav1/Tyrobp/Syk/Cybb/Nrros/Ncf1/Itgb2/P2rx7/Tlr4/Ptk2b/Tgfbr2/Cyba/Prkcd/Prcp	16
Immune_reactive	GO:0001776	leukocyte homeostasis	122/20514	3.98e-09	9.32e-08	6.27e-08	Fcgr2b/Itgam/Fcer1g/Nckap1l/P2rx7/Lyn/Mef2c/Slc40a1/Tcirg1/Cfh/Sh2b3/Dock10	12
Immune_reactive	GO:0045621	positive regulation of lymphocyte differentiation	122/20514	3.98e-09	9.32e-08	6.27e-08	Inpp5d/Cd83/Syk/Lilrb4b/Nfkbid/Ptprc/Ikzf1/Nckap1l/Vsir/Lgals9/Il4ra/Tgfbr2	12
Immune_reactive	GO:0002224	toll-like receptor signaling pathway	123/20514	4.37e-09	1.02e-07	6.84e-08	Pik3ap1/Trem2/Tlr13/Tlr7/Cd86/Unc93b1/Cd180/Lyn/Lgals9/Tlr4/Cyba/Rab7b	12
Immune_reactive	GO:0070664	negative regulation of leukocyte proliferation	98/20514	4.41e-09	1.02e-07	6.84e-08	Fcgr2b/Inpp5d/Tyrobp/Laptm5/Lilrb4b/Cd86/Lyn/Vsir/Ptpn6/Lgals9/Gal	11
Immune_reactive	GO:0050921	positive regulation of chemotaxis	151/20514	4.55e-09	1.04e-07	6.98e-08	Rac2/C3ar1/Csf1r/Ccr1/Trem2/Cx3cr1/Nckap1l/Spi1/Pla2g7/Lgmn/P2ry12/Ptk2b/Ptprj	13
Immune_reactive	GO:0043312	neutrophil degranulation	15/20514	4.56e-09	1.04e-07	6.98e-08	Itgam/Syk/Myo1f/Spi1/Itgb2/Abr	6
Immune_reactive	GO:1903039	positive regulation of leukocyte cell-cell adhesion	247/20514	4.67e-09	1.05e-07	7.09e-08	Cd83/Syk/Lilrb4b/Nfkbid/Ptprc/Ikzf1/Dock8/Nckap1l/Itgb2/Cd86/Pycard/Vsir/Lgals9/Il4ra/Tgfbr2/Sirpa	16
Immune_reactive	GO:0002690	positive regulation of leukocyte chemotaxis	99/20514	4.91e-09	1.1e-07	7.42e-08	Rac2/C3ar1/Csf1r/Ccr1/Cx3cr1/Nckap1l/Spi1/Pla2g7/Lgmn/Ptk2b/Ptprj	11
Immune_reactive	GO:0042116	macrophage activation	100/20514	5.47e-09	1.22e-07	8.2e-08	Slc11a1/C1qa/Itgam/Trem2/Tyrobp/Syk/Cd84/Cx3cr1/Lgals9/Tlr4/Il4ra	11
Immune_reactive	GO:0002688	regulation of leukocyte chemotaxis	126/20514	5.76e-09	1.27e-07	8.57e-08	Rac2/C3ar1/Csf1r/Ccr1/Cx3cr1/Nckap1l/Spi1/Pla2g7/Lyn/Lgmn/Ptk2b/Ptprj	12
Immune_reactive	GO:0048872	homeostasis of number of cells	365/20514	6.02e-09	1.32e-07	8.89e-08	Fcgr2b/Itgam/Inpp5d/Ikzf1/Fcer1g/Hcls1/Cx3cr1/Nckap1l/Spi1/Rassf2/P2rx7/Lyn/Mef2c/Slc40a1/Mafb/Tcirg1/Cfh/Sh2b3/Dock10	19
Immune_reactive	GO:0046631	alpha-beta T cell activation	185/20514	6.12e-09	1.34e-07	8.99e-08	Wdfy4/Cd83/Syk/Lilrb4b/Nfkbid/Ptprc/Dock2/Ikzf1/Nckap1l/Vsir/Lgals9/Tcirg1/Il4ra/Tgfbr2	14
Immune_reactive	GO:0033006	regulation of mast cell activation involved in immune response	41/20514	6.74e-09	1.46e-07	9.83e-08	Rac2/Syk/Cd84/Fcer1g/Lyn/Ptpn6/Pld2/Il4ra	8
Immune_reactive	GO:2000379	positive regulation of reactive oxygen species metabolic process	79/20514	6.92e-09	1.49e-07	1e-07	Xdh/Itgam/Tyrobp/Syk/Itgb2/Tlr4/Ptk2b/Tgfbr2/Cyba/Prkcd	10
Immune_reactive	GO:0002698	negative regulation of immune effector process	129/20514	7.54e-09	1.61e-07	1.08e-07	Fcgr2b/Lilrb4b/Ptprc/Cd84/Cx3cr1/Nckap1l/Spi1/Vsir/Ptpn6/Lgals9/Abr/Il4ra	12
Immune_reactive	GO:0001909	leukocyte mediated cytotoxicity	158/20514	7.9e-09	1.68e-07	1.13e-07	Itgam/Vav1/Tyrobp/Ptprc/Fcgr3/Cx3cr1/Nckap1l/Ncf1/Spi1/P2rx7/Ptpn6/Lgals9/Ctsh	13
Immune_reactive	GO:0050870	positive regulation of T cell activation	222/20514	8.14e-09	1.72e-07	1.15e-07	Cd83/Syk/Lilrb4b/Nfkbid/Ptprc/Ikzf1/Dock8/Nckap1l/Cd86/Pycard/Vsir/Lgals9/Il4ra/Tgfbr2/Sirpa	15
Immune_reactive	GO:0033003	regulation of mast cell activation	60/20514	8.63e-09	1.81e-07	1.22e-07	Rac2/Milr1/Syk/Cd84/Fcer1g/Lyn/Ptpn6/Pld2/Il4ra	9
Immune_reactive	GO:0032731	positive regulation of interleukin-1 beta production	61/20514	1e-08	2.09e-07	1.41e-07	Ifi207/Nlrc4/Tyrobp/Pycard/P2rx7/Lpl/Aim2/Casp8/Tlr4	9
Immune_reactive	GO:0045582	positive regulation of T cell differentiation	106/20514	1.02e-08	2.11e-07	1.42e-07	Cd83/Syk/Lilrb4b/Nfkbid/Ptprc/Ikzf1/Nckap1l/Vsir/Lgals9/Il4ra/Tgfbr2	11
Immune_reactive	GO:0070665	positive regulation of leukocyte proliferation	163/20514	1.15e-08	2.37e-07	1.59e-07	Csf2rb2/Csf1r/Csf2rb/Syk/Ptprc/Nckap1l/Cd86/Pycard/Lyn/Mef2c/Tlr4/Tgfbr2/Csf2ra	13
Immune_reactive	GO:0050730	regulation of peptidyl-tyrosine phosphorylation	264/20514	1.2e-08	2.46e-07	1.65e-07	Csf1r/Clec4n/Trem2/Syk/Lilrb4b/Ptprc/Hcls1/Itgb2/Tec/Lyn/Ptpn6/Tlr4/Sh2b3/Ptk2b/Ptprj/Prkcd	16
Immune_reactive	GO:1903037	regulation of leukocyte cell-cell adhesion	342/20514	1.3e-08	2.63e-07	1.77e-07	Cd83/Syk/Laptm5/Lilrb4b/Nfkbid/Ptprc/Ikzf1/Dock8/Nckap1l/Itgb2/Cd86/Pycard/Vsir/Ptpn6/Lgals9/Il4ra/Tgfbr2/Sirpa	18
Immune_reactive	GO:0050727	regulation of inflammatory response	344/20514	1.42e-08	2.86e-07	1.93e-07	Fcgr2b/Pik3cg/Pik3ap1/Ctss/Trem2/Tnfrsf11a/Aoah/Fcer1g/Fcgr3/Cx3cr1/Ncf1/Pycard/Lyn/Lpl/Lgals9/Abr/Tlr4/Tnfrsf1b	18
Immune_reactive	GO:0043405	regulation of MAP kinase activity	198/20514	1.46e-08	2.91e-07	1.95e-07	Pik3cg/Fgd2/Syk/Ptprc/Tnfrsf11a/Pik3r5/P2rx7/Lyn/Ptpn6/Tlr4/Sh2b3/Ptk2b/Ptprj/Prkcd	14
Immune_reactive	GO:0030225	macrophage differentiation	45/20514	1.47e-08	2.91e-07	1.95e-07	Csf1r/C1qc/Itgam/Nrros/Hcls1/Spi1/Gab3/Casp8	8
Immune_reactive	GO:0042554	superoxide anion generation	45/20514	1.47e-08	2.91e-07	1.95e-07	Itgam/Tyrobp/Syk/Cybb/Ncf1/Itgb2/Cyba/Prkcd	8
Immune_reactive	GO:0045619	regulation of lymphocyte differentiation	200/20514	1.66e-08	3.26e-07	2.2e-07	Inpp5d/Cd83/Syk/Lilrb4b/Nfkbid/Ptprc/Ikzf1/Nckap1l/Vsir/Ptpn6/Lgals9/Sh2b3/Il4ra/Tgfbr2	14
Immune_reactive	GO:0045639	positive regulation of myeloid cell differentiation	112/20514	1.82e-08	3.56e-07	2.4e-07	Csf1r/Itgam/Ccr1/Trem2/Inpp5d/Tyrobp/Ikzf1/Hcls1/Nckap1l/Casp8/Rab7b	11
Immune_reactive	GO:0033627	cell adhesion mediated by integrin	88/20514	2e-08	3.89e-07	2.62e-07	Itgam/Syk/Nckap1l/Itgb2/Fermt3/Itgax/Lyn/Ptpn6/Lpxn/P2ry12	10
Immune_reactive	GO:0002279	mast cell activation involved in immune response	67/20514	2.35e-08	4.53e-07	3.05e-07	Rac2/Milr1/Syk/Cd84/Fcer1g/Lyn/Ptpn6/Pld2/Il4ra	9
Immune_reactive	GO:0042100	B cell proliferation	115/20514	2.41e-08	4.59e-07	3.09e-07	Fcgr2b/Inpp5d/Tyrobp/Ptprc/Nckap1l/Cd180/Lyn/Mef2c/Plcl2/Tlr4/Prkcd	11
Immune_reactive	GO:0046634	regulation of alpha-beta T cell activation	115/20514	2.41e-08	4.59e-07	3.09e-07	Cd83/Syk/Lilrb4b/Nfkbid/Ptprc/Ikzf1/Nckap1l/Vsir/Lgals9/Il4ra/Tgfbr2	11
Immune_reactive	GO:0045089	positive regulation of innate immune response	144/20514	2.62e-08	4.96e-07	3.33e-07	Ifi207/Clec4n/Nlrc4/Vav1/Tyrobp/Syk/Spi1/Pycard/Aim2/Lgals9/Ikbke/Tlr4	12
Immune_reactive	GO:0006801	superoxide metabolic process	68/20514	2.68e-08	5.06e-07	3.4e-07	Itgam/Tyrobp/Syk/Cybb/Nrros/Ncf1/Itgb2/Cyba/Prkcd	9
Immune_reactive	GO:0002221	pattern recognition receptor signaling pathway	176/20514	2.89e-08	5.42e-07	3.64e-07	Pik3ap1/Trem2/Tlr13/Slc15a3/Tlr7/Cd86/Unc93b1/Cd180/Lyn/Lgals9/Tlr4/Cyba/Rab7b	13
Immune_reactive	GO:0018108	peptidyl-tyrosine phosphorylation	321/20514	3.05e-08	5.66e-07	3.81e-07	Csf1r/Clec4n/Trem2/Syk/Lilrb4b/Ptprc/Hcls1/Itgb2/Tec/Lyn/Hck/Ptpn6/Tlr4/Sh2b3/Ptk2b/Ptprj/Prkcd	17
Immune_reactive	GO:0071677	positive regulation of mononuclear cell migration	69/20514	3.06e-08	5.66e-07	3.81e-07	Ccr1/Dock8/Cx3cr1/Spi1/Pycard/Pla2g7/Lgals9/Lgmn/Ptk2b	9
Immune_reactive	GO:0019882	antigen processing and presentation	118/20514	3.16e-08	5.81e-07	3.91e-07	Fcgr4/Fcgr2b/Slc11a1/Wdfy4/Ctss/Trem2/Fcer1g/Fcgr3/Pycard/Cd68/Unc93b1	11
Immune_reactive	GO:0017157	regulation of exocytosis	246/20514	3.22e-08	5.9e-07	3.96e-07	Rac2/Itgam/Syk/Cd84/Fcer1g/Nckap1l/Spi1/Itgb2/P2rx7/Lyn/Lgals9/Prkcb/Abr/Pld2/Il4ra	15
Immune_reactive	GO:0055094	response to lipoprotein particle	33/20514	3.29e-08	5.99e-07	4.03e-07	Trem2/Syk/Fcer1g/Itgb2/Cd68/Lpl/Tlr4	7
Immune_reactive	GO:0018212	peptidyl-tyrosine modification	324/20514	3.5e-08	6.33e-07	4.25e-07	Csf1r/Clec4n/Trem2/Syk/Lilrb4b/Ptprc/Hcls1/Itgb2/Tec/Lyn/Hck/Ptpn6/Tlr4/Sh2b3/Ptk2b/Ptprj/Prkcd	17
Immune_reactive	GO:0010952	positive regulation of peptidase activity	180/20514	3.78e-08	6.79e-07	4.57e-07	Ifi207/Xdh/Nlrc4/Syk/Laptm5/Pycard/Lyn/Vsir/Aim2/Casp8/Lgmn/St18/Ctsh	13
Immune_reactive	GO:0150146	cell junction disassembly	21/20514	4.7e-08	8.4e-07	5.65e-07	C1qb/C1qc/C1qa/Itgam/Trem2/Cx3cr1	6
Immune_reactive	GO:0043547	positive regulation of GTPase activity	256/20514	5.46e-08	9.7e-07	6.52e-07	Rgs1/Arhgap25/Adap2/Vav1/Arhgap45/Dock8/Arhgap27/Rapgef5/Rgs10/Rap1gap2/Abr/Gmip/Ptk2b/Grtp1/Dock10	15
Immune_reactive	GO:0042129	regulation of T cell proliferation	187/20514	5.93e-08	1.05e-06	7.05e-07	Rac2/Syk/Laptm5/Lilrb4b/Ptprc/Nckap1l/Cd86/Pycard/Vsir/Ptpn6/Lgals9/Tgfbr2/Tnfrsf1b	13
Immune_reactive	GO:0022409	positive regulation of cell-cell adhesion	297/20514	6.24e-08	1.09e-06	7.35e-07	Cd83/Syk/Lilrb4b/Nfkbid/Ptprc/Ikzf1/Dock8/Nckap1l/Itgb2/Cd86/Pycard/Vsir/Lgals9/Il4ra/Tgfbr2/Sirpa	16
Immune_reactive	GO:0071402	cellular response to lipoprotein particle stimulus	36/20514	6.27e-08	1.09e-06	7.35e-07	Trem2/Syk/Fcer1g/Itgb2/Cd68/Lpl/Tlr4	7
Immune_reactive	GO:1905954	positive regulation of lipid localization	99/20514	6.28e-08	1.09e-06	7.35e-07	Tnfrsf11a/Msr1/P2rx7/Lpl/Spp1/Dab2/Ikbke/Gal/Prkcd/Ldlrap1	10
Immune_reactive	GO:0002495	antigen processing and presentation of peptide antigen via MHC class II	22/20514	6.4e-08	1.11e-06	7.45e-07	Fcgr2b/Ctss/Trem2/Fcer1g/Pycard/Unc93b1	6
Immune_reactive	GO:0046638	positive regulation of alpha-beta T cell differentiation	54/20514	6.56e-08	1.13e-06	7.59e-07	Cd83/Syk/Lilrb4b/Nfkbid/Ikzf1/Nckap1l/Il4ra/Tgfbr2	8
Immune_reactive	GO:0043301	negative regulation of leukocyte degranulation	12/20514	7.45e-08	1.27e-06	8.53e-07	Cd84/Nckap1l/Spi1/Lgals9/Abr	5
Immune_reactive	GO:0043313	regulation of neutrophil degranulation	12/20514	7.45e-08	1.27e-06	8.53e-07	Itgam/Syk/Spi1/Itgb2/Abr	5
Immune_reactive	GO:0030593	neutrophil chemotaxis	101/20514	7.61e-08	1.29e-06	8.67e-07	Rac2/C3ar1/Itgam/Vav1/Syk/Fcer1g/Fcgr3/Nckap1l/Itgb2/Spp1	10
Immune_reactive	GO:0043304	regulation of mast cell degranulation	37/20514	7.66e-08	1.29e-06	8.68e-07	Rac2/Syk/Cd84/Fcer1g/Lyn/Pld2/Il4ra	7
Immune_reactive	GO:0043087	regulation of GTPase activity	345/20514	8.68e-08	1.45e-06	9.77e-07	Rgs1/Arhgap25/Adap2/Vav1/Arhgap45/Arhgap15/Dock8/Pycard/Arhgap27/Rapgef5/Rgs10/Rap1gap2/Abr/Gmip/Ptk2b/Grtp1/Dock10	17
Immune_reactive	GO:0046635	positive regulation of alpha-beta T cell activation	78/20514	9.1e-08	1.52e-06	1.02e-06	Cd83/Syk/Lilrb4b/Nfkbid/Ptprc/Ikzf1/Nckap1l/Il4ra/Tgfbr2	9
Immune_reactive	GO:0050920	regulation of chemotaxis	230/20514	9.59e-08	1.59e-06	1.07e-06	Rac2/C3ar1/Csf1r/Ccr1/Trem2/Cx3cr1/Nckap1l/Spi1/Pla2g7/Lyn/Lgmn/P2ry12/Ptk2b/Ptprj	14
Immune_reactive	GO:0051090	regulation of DNA-binding transcription factor activity	435/20514	9.84e-08	1.62e-06	1.09e-06	Fcgr2b/Nlrc4/Syk/Nfkbid/Cd84/Tnfrsf11a/Hcls1/Cx3cr1/Spi1/Itgb2/Pycard/Prkch/Hck/Aim2/Ikbke/Prkcb/Heyl/Tlr4/Rab7b	19
Immune_reactive	GO:0071900	regulation of protein serine/threonine kinase activity	351/20514	1.11e-07	1.82e-06	1.23e-06	Pik3cg/Csf1r/Fgd2/Syk/Ptprc/Tnfrsf11a/Pycard/Pik3r5/P2rx7/Lyn/Dab2/Ptpn6/Tlr4/Sh2b3/Ptk2b/Ptprj/Prkcd	17
Immune_reactive	GO:0002504	antigen processing and presentation of peptide or polysaccharide antigen via MHC class II	24/20514	1.14e-07	1.84e-06	1.24e-06	Fcgr2b/Ctss/Trem2/Fcer1g/Pycard/Unc93b1	6
Immune_reactive	GO:0032930	positive regulation of superoxide anion generation	24/20514	1.14e-07	1.84e-06	1.24e-06	Itgam/Tyrobp/Syk/Itgb2/Cyba/Prkcd	6
Immune_reactive	GO:0002218	activation of innate immune response	58/20514	1.17e-07	1.89e-06	1.27e-06	Ifi207/Clec4n/Nlrc4/Tyrobp/Syk/Pycard/Aim2/Tlr4	8
Immune_reactive	GO:0031341	regulation of cell killing	134/20514	1.18e-07	1.89e-06	1.27e-06	Itgam/Vav1/Tyrobp/Syk/Ptprc/Cx3cr1/Nckap1l/Spi1/P2rx7/Lgals9/Cfh	11
Immune_reactive	GO:0045580	regulation of T cell differentiation	166/20514	1.27e-07	2.02e-06	1.36e-06	Cd83/Syk/Lilrb4b/Nfkbid/Ptprc/Ikzf1/Nckap1l/Vsir/Lgals9/Sh2b3/Il4ra/Tgfbr2	12
Immune_reactive	GO:1905952	regulation of lipid localization	167/20514	1.35e-07	2.14e-06	1.44e-06	Trem2/Syk/Tnfrsf11a/Msr1/P2rx7/Lpl/Spp1/Dab2/Ikbke/Gal/Prkcd/Ldlrap1	12
Immune_reactive	GO:0002446	neutrophil mediated immunity	40/20514	1.35e-07	2.14e-06	1.44e-06	Itgam/Syk/Myo1f/Ncf1/Spi1/Itgb2/Abr	7
Immune_reactive	GO:0045670	regulation of osteoclast differentiation	82/20514	1.41e-07	2.22e-06	1.49e-06	Csf1r/Ccr1/Trem2/Inpp5d/Tyrobp/Lilrb4b/Rassf2/Mafb/Mitf	9
Immune_reactive	GO:0045862	positive regulation of proteolysis	357/20514	1.41e-07	2.22e-06	1.49e-06	Ifi207/Xdh/Nlrc4/Trem2/Syk/Laptm5/Pycard/Lyn/Vsir/Aim2/Dab2/Casp8/Lgmn/St18/Ptk2b/Tnfrsf1b/Ctsh	17
Immune_reactive	GO:0002888	positive regulation of myeloid leukocyte mediated immunity	25/20514	1.48e-07	2.31e-06	1.55e-06	Itgam/Tyrobp/Fcer1g/Fcgr3/Spi1/Itgb2	6
Immune_reactive	GO:0034109	homotypic cell-cell adhesion	83/20514	1.57e-07	2.44e-06	1.64e-06	Syk/Fermt3/Lyn/Ptpn6/Plek/Cfh/P2ry12/Sh2b3/Prkcd	9
Immune_reactive	GO:0032733	positive regulation of interleukin-10 production	41/20514	1.62e-07	2.5e-06	1.68e-06	Trem2/Cd83/Syk/Fcer1g/Pycard/Lgals9/Tlr4	7
Immune_reactive	GO:0010950	positive regulation of endopeptidase activity	170/20514	1.64e-07	2.52e-06	1.7e-06	Ifi207/Xdh/Nlrc4/Syk/Laptm5/Pycard/Lyn/Vsir/Aim2/Casp8/Lgmn/St18	12
Immune_reactive	GO:0032722	positive regulation of chemokine production	84/20514	1.74e-07	2.67e-06	1.79e-06	Csf1r/Syk/Cd84/Tlr7/Pycard/Lpl/Lgals9/Tlr4/Il4ra	9
Immune_reactive	GO:0045730	respiratory burst	26/20514	1.91e-07	2.91e-06	1.95e-06	Rac2/Slc11a1/Trem2/Cybb/Ncf1/Cyba	6
Immune_reactive	GO:0043303	mast cell degranulation	63/20514	2.26e-07	3.42e-06	2.3e-06	Rac2/Milr1/Syk/Cd84/Fcer1g/Lyn/Pld2/Il4ra	8
Immune_reactive	GO:0050864	regulation of B cell activation	145/20514	2.63e-07	3.97e-06	2.67e-06	Fcgr2b/Inpp5d/Tyrobp/Syk/Laptm5/Ptprc/Nckap1l/Lyn/Mef2c/Ptpn6/Tlr4	11
Immune_reactive	GO:0002448	mast cell mediated immunity	65/20514	2.89e-07	4.34e-06	2.92e-06	Rac2/Milr1/Syk/Cd84/Fcer1g/Lyn/Pld2/Il4ra	8
Immune_reactive	GO:0032928	regulation of superoxide anion generation	28/20514	3.07e-07	4.58e-06	3.08e-06	Itgam/Tyrobp/Syk/Itgb2/Cyba/Prkcd	6
Immune_reactive	GO:0009615	response to virus	334/20514	3.08e-07	4.58e-06	3.08e-06	Ifi207/Wdfy4/Ptprc/Tlr13/Tlr7/Cd86/Pycard/Unc93b1/Itgax/Irf5/Pou2f2/Aim2/Apobec1/Lgals9/Ikbke/Il10rb	16
Immune_reactive	GO:1905521	regulation of macrophage migration	45/20514	3.16e-07	4.67e-06	3.14e-06	C3ar1/Csf1r/Trem2/Cx3cr1/P2ry12/Ptk2b/Ptprj	7
Immune_reactive	GO:0002706	regulation of lymphocyte mediated immunity	217/20514	3.35e-07	4.92e-06	3.31e-06	Fcgr2b/Trem2/Vav1/Lilrb4b/Ptprc/Fcer1g/Fcgr3/Nckap1l/P2rx7/Vsir/Ptpn6/Lgals9/Tnfrsf1b	13
Immune_reactive	GO:1902563	regulation of neutrophil activation	16/20514	3.98e-07	5.83e-06	3.92e-06	Itgam/Syk/Spi1/Itgb2/Abr	5
Immune_reactive	GO:0030888	regulation of B cell proliferation	69/20514	4.63e-07	6.76e-06	4.54e-06	Fcgr2b/Inpp5d/Tyrobp/Ptprc/Nckap1l/Lyn/Mef2c/Tlr4	8
Immune_reactive	GO:0043409	negative regulation of MAPK cascade	188/20514	4.87e-07	7.08e-06	4.76e-06	Trem2/Lilrb4b/Ptprc/P2rx7/Lyn/Dab2/Ptpn6/Tlr4/Sh2b3/Ptprj/Sirpa/Prkcd	12
Immune_reactive	GO:0033628	regulation of cell adhesion mediated by integrin	48/20514	4.99e-07	7.21e-06	4.85e-06	Syk/Nckap1l/Fermt3/Lyn/Ptpn6/Lpxn/P2ry12	7
Immune_reactive	GO:0002763	positive regulation of myeloid leukocyte differentiation	71/20514	5.79e-07	8.33e-06	5.6e-06	Csf1r/Itgam/Ccr1/Trem2/Tyrobp/Ikzf1/Hcls1/Casp8	8
Immune_reactive	GO:1905523	positive regulation of macrophage migration	31/20514	5.86e-07	8.35e-06	5.62e-06	C3ar1/Csf1r/Trem2/Cx3cr1/P2ry12/Ptprj	6
Immune_reactive	GO:0051092	positive regulation of NF-kappaB transcription factor activity	157/20514	5.86e-07	8.35e-06	5.62e-06	Nlrc4/Cd84/Tnfrsf11a/Cx3cr1/Itgb2/Pycard/Prkch/Aim2/Prkcb/Tlr4/Rab7b	11
Immune_reactive	GO:0048002	antigen processing and presentation of peptide antigen	72/20514	6.46e-07	9.17e-06	6.17e-06	Fcgr2b/Slc11a1/Ctss/Trem2/Fcer1g/Fcgr3/Pycard/Unc93b1	8
Immune_reactive	GO:1990266	neutrophil migration	127/20514	6.6e-07	9.33e-06	6.27e-06	Rac2/C3ar1/Itgam/Vav1/Syk/Fcer1g/Fcgr3/Nckap1l/Itgb2/Spp1	10
Immune_reactive	GO:0002455	humoral immune response mediated by circulating immunoglobulin	50/20514	6.65e-07	9.36e-06	6.3e-06	Fcgr2b/C1qb/C1qc/C1qa/Trem2/Ptprc/Ptpn6	7
Immune_reactive	GO:0007162	negative regulation of cell adhesion	312/20514	6.98e-07	9.78e-06	6.57e-06	Laptm5/Myo1f/Lilrb4b/Nfkbid/Ptprc/Nckap1l/Spi1/Cd86/Vsir/Ptpn6/Lgals9/Lpxn/Sh2b3/Il4ra/Prkcd	15
Immune_reactive	GO:0050858	negative regulation of antigen receptor-mediated signaling pathway	32/20514	7.15e-07	9.97e-06	6.7e-06	Laptm5/Lilrb4b/Ptpn6/Lpxn/Plcl2/Ptprj	6
Immune_reactive	GO:0046637	regulation of alpha-beta T cell differentiation	73/20514	7.19e-07	9.99e-06	6.72e-06	Cd83/Syk/Lilrb4b/Nfkbid/Ikzf1/Nckap1l/Il4ra/Tgfbr2	8
Immune_reactive	GO:0051091	positive regulation of DNA-binding transcription factor activity	272/20514	7.38e-07	1.02e-05	6.86e-06	Fcgr2b/Nlrc4/Cd84/Tnfrsf11a/Hcls1/Cx3cr1/Itgb2/Pycard/Prkch/Aim2/Ikbke/Prkcb/Tlr4/Rab7b	14
Immune_reactive	GO:2000377	regulation of reactive oxygen species metabolic process	161/20514	7.53e-07	1.04e-05	6.97e-06	Xdh/Itgam/Tyrobp/Syk/Itgb2/Tlr4/Ptk2b/Tgfbr2/Cyba/Prkcd/Prcp	11
Immune_reactive	GO:0043406	positive regulation of MAP kinase activity	129/20514	7.63e-07	1.05e-05	7.03e-06	Pik3cg/Fgd2/Syk/Ptprc/Tnfrsf11a/Pik3r5/P2rx7/Tlr4/Ptk2b/Prkcd	10
Immune_reactive	GO:0050855	regulation of B cell receptor signaling pathway	18/20514	7.68e-07	1.05e-05	7.04e-06	Prkch/Lyn/Prkcb/Lpxn/Plcl2	5
Immune_reactive	GO:0009611	response to wounding	499/20514	7.99e-07	1.09e-05	7.3e-06	Slc11a1/Trem2/Tyrobp/Syk/Fcer1g/Entpd1/Tec/Fermt3/Lcp1/Lyn/Ptpn6/Plek/Cfh/P2ry12/Tlr4/Sh2b3/Ptprj/Prkcd/Prcp	19
Immune_reactive	GO:0002262	myeloid cell homeostasis	198/20514	8.47e-07	1.15e-05	7.7e-06	Fcgr2b/Itgam/Inpp5d/Ikzf1/Fcer1g/Hcls1/Nckap1l/Spi1/Lyn/Mafb/Cfh/Sh2b3	12
Immune_reactive	GO:0045124	regulation of bone resorption	52/20514	8.76e-07	1.18e-05	7.94e-06	Fcgr4/Csf1r/Inpp5d/Syk/Tnfrsf11a/P2rx7/Spp1	7
Immune_reactive	GO:0002823	negative regulation of adaptive immune response based on somatic recombination of immune receptors built from immunoglobulin superfamily domains	53/20514	1e-06	1.34e-05	8.99e-06	Fcgr2b/Lilrb4b/Ptprc/Nckap1l/Vsir/Ptpn6/Il4ra	7
Immune_reactive	GO:0032715	negative regulation of interleukin-6 production	53/20514	1e-06	1.34e-05	8.99e-06	Inpp5d/Lilrb4b/Cd84/Nckap1l/Ptpn6/Tlr4/Sirpa	7
Immune_reactive	GO:0090322	regulation of superoxide metabolic process	34/20514	1.04e-06	1.39e-05	9.33e-06	Itgam/Tyrobp/Syk/Itgb2/Cyba/Prkcd	6
Immune_reactive	GO:0001894	tissue homeostasis	281/20514	1.09e-06	1.44e-05	9.69e-06	Fcgr4/Rac2/Csf1r/Ctss/Inpp5d/Syk/Tnfrsf11a/Ptgs1/P2rx7/Spp1/Tcirg1/Tlr4/Ptk2b/Ctsh	14
Immune_reactive	GO:0032609	interferon-gamma production	137/20514	1.33e-06	1.74e-05	1.17e-05	Slc11a1/Laptm5/Lilrb4b/Tlr7/Pycard/Irf8/Vsir/Lgals9/Tcirg1/Tlr4	10
Immune_reactive	GO:0042060	wound healing	373/20514	1.33e-06	1.74e-05	1.17e-05	Slc11a1/Syk/Fcer1g/Entpd1/Tec/Fermt3/Lyn/Ptpn6/Plek/Cfh/P2ry12/Tlr4/Sh2b3/Ptprj/Prkcd/Prcp	16
Immune_reactive	GO:0050878	regulation of body fluid levels	373/20514	1.33e-06	1.74e-05	1.17e-05	Xdh/Syk/Fcer1g/Entpd1/Tec/Fermt3/Lyn/Ptpn6/Plek/Cfh/P2ry12/Tlr4/Sh2b3/Ptprj/Cyba/Prkcd	16
Immune_reactive	GO:0022408	negative regulation of cell-cell adhesion	207/20514	1.35e-06	1.76e-05	1.19e-05	Laptm5/Lilrb4b/Nfkbid/Nckap1l/Spi1/Cd86/Vsir/Ptpn6/Lgals9/Sh2b3/Il4ra/Prkcd	12
Immune_reactive	GO:0071887	leukocyte apoptotic process	141/20514	1.73e-06	2.24e-05	1.5e-05	Fcgr2b/Itgam/Nfkbid/Fcer1g/Hcls1/Dock8/P2rx7/Lyn/Mef2c/Casp8	10
Immune_reactive	GO:0002820	negative regulation of adaptive immune response	58/20514	1.87e-06	2.42e-05	1.63e-05	Fcgr2b/Lilrb4b/Ptprc/Nckap1l/Vsir/Ptpn6/Il4ra	7
Immune_reactive	GO:0002440	production of molecular mediator of immune response	253/20514	1.89e-06	2.43e-05	1.63e-05	Fcgr2b/Slc11a1/Laptm5/Lilrb4b/Ptprc/Fcer1g/Cd86/Vsir/Pou2f2/Tcirg1/Tlr4/Il4ra/Tnfrsf1b	13
Immune_reactive	GO:0015850	organic hydroxy compound transport	254/20514	1.97e-06	2.53e-05	1.7e-05	Syk/Msr1/Fcer1g/Fcgr3/Ptgs1/Abcc3/Entpd1/Spp1/Dab2/Prkcb/P2ry12/Gal/Ldlrap1	13
Immune_reactive	GO:0043302	positive regulation of leukocyte degranulation	38/20514	2.07e-06	2.64e-05	1.78e-05	Itgam/Syk/Fcer1g/Itgb2/Pld2/Il4ra	6
Immune_reactive	GO:0033674	positive regulation of kinase activity	434/20514	2.12e-06	2.7e-05	1.82e-05	Pik3cg/Csf1r/Slc11a1/Trem2/Fgd2/Syk/Ptprc/Tnfrsf11a/Cd86/Rassf2/Pik3r5/P2rx7/Lyn/Tlr4/Ptk2b/Tgfbr2/Prkcd	17
Immune_reactive	GO:2000106	regulation of leukocyte apoptotic process	113/20514	2.2e-06	2.78e-05	1.87e-05	Fcgr2b/Nfkbid/Fcer1g/Hcls1/Dock8/P2rx7/Lyn/Mef2c/Casp8	9
Immune_reactive	GO:0097202	activation of cysteine-type endopeptidase activity	22/20514	2.28e-06	2.88e-05	1.94e-05	Ifi207/Nlrc4/Pycard/Casp8/Lgmn	5
Immune_reactive	GO:0034103	regulation of tissue remodeling	85/20514	2.32e-06	2.92e-05	1.96e-05	Fcgr4/Csf1r/Inpp5d/Syk/Tnfrsf11a/P2rx7/Spp1/Abr	8
Immune_reactive	GO:0070371	ERK1 and ERK2 cascade	348/20514	2.71e-06	3.39e-05	2.28e-05	Csf1r/Ccr1/Trem2/Syk/Ptprc/Tnfrsf11a/Pycard/P2ry6/Lyn/Dab2/Ptpn6/Tlr4/Ptk2b/Sirpa/Ctsh	15
Immune_reactive	GO:0001910	regulation of leukocyte mediated cytotoxicity	116/20514	2.74e-06	3.41e-05	2.29e-05	Itgam/Vav1/Tyrobp/Ptprc/Cx3cr1/Nckap1l/Spi1/P2rx7/Lgals9	9
Immune_reactive	GO:0002335	mature B cell differentiation	40/20514	2.83e-06	3.51e-05	2.36e-05	Spi1/Irf8/Pou2f2/Plcl2/Ptk2b/Dock10	6
Immune_reactive	GO:2001056	positive regulation of cysteine-type endopeptidase activity	149/20514	2.84e-06	3.52e-05	2.36e-05	Ifi207/Xdh/Nlrc4/Syk/Laptm5/Pycard/Aim2/Casp8/Lgmn/St18	10
Immune_reactive	GO:0002707	negative regulation of lymphocyte mediated immunity	62/20514	2.96e-06	3.61e-05	2.43e-05	Fcgr2b/Lilrb4b/Ptprc/Nckap1l/Vsir/Ptpn6/Lgals9	7
Immune_reactive	GO:0031663	lipopolysaccharide-mediated signaling pathway	62/20514	2.96e-06	3.61e-05	2.43e-05	Trem2/Cd84/Ly86/Spi1/Cd180/Lyn/Tlr4	7
Immune_reactive	GO:0046850	regulation of bone remodeling	62/20514	2.96e-06	3.61e-05	2.43e-05	Fcgr4/Csf1r/Inpp5d/Syk/Tnfrsf11a/P2rx7/Spp1	7
Immune_reactive	GO:0002887	negative regulation of myeloid leukocyte mediated immunity	11/20514	3.14e-06	3.83e-05	2.57e-05	Cd84/Cx3cr1/Spi1/Abr	4
Immune_reactive	GO:1905517	macrophage migration	63/20514	3.3e-06	4e-05	2.69e-05	C3ar1/Csf1r/Trem2/Cx3cr1/P2ry12/Ptk2b/Ptprj	7
Immune_reactive	GO:0006898	receptor-mediated endocytosis	267/20514	3.42e-06	4.13e-05	2.78e-05	Fcgr2b/Itgam/Syk/Lilrb4b/Msr1/Fcer1g/Itgb2/Arhgap27/Dab2/Cxcl16/Pld2/Tgfbr2/Ldlrap1	13
Immune_reactive	GO:0032693	negative regulation of interleukin-10 production	24/20514	3.62e-06	4.36e-05	2.93e-05	Fcgr2b/Tyrobp/Lilrb4b/Cd84/Vsir	5
Immune_reactive	GO:0045860	positive regulation of protein kinase activity	357/20514	3.7e-06	4.43e-05	2.98e-05	Pik3cg/Csf1r/Slc11a1/Fgd2/Syk/Ptprc/Tnfrsf11a/Cd86/Rassf2/Pik3r5/P2rx7/Tlr4/Ptk2b/Tgfbr2/Prkcd	15
Immune_reactive	GO:0001774	microglial cell activation	42/20514	3.8e-06	4.53e-05	3.05e-05	C1qa/Itgam/Trem2/Tyrobp/Cx3cr1/Tlr4	6
Immune_reactive	GO:0050731	positive regulation of peptidyl-tyrosine phosphorylation	190/20514	3.81e-06	4.53e-05	3.05e-05	Csf1r/Clec4n/Trem2/Syk/Ptprc/Hcls1/Tec/Lyn/Tlr4/Ptk2b/Ptprj	11
Immune_reactive	GO:1903306	negative regulation of regulated secretory pathway	25/20514	4.49e-06	5.33e-05	3.58e-05	Cd84/Nckap1l/Spi1/Lgals9/Abr	5
Immune_reactive	GO:0150076	neuroinflammatory response	66/20514	4.53e-06	5.35e-05	3.6e-05	C1qa/Itgam/Trem2/Tyrobp/Cx3cr1/Tlr4/Tnfrsf1b	7
Immune_reactive	GO:0032418	lysosome localization	93/20514	4.59e-06	5.38e-05	3.62e-05	Rac2/Milr1/Syk/Cd84/Fcer1g/Lyn/Pld2/Il4ra	8
Immune_reactive	GO:1990849	vacuolar localization	93/20514	4.59e-06	5.38e-05	3.62e-05	Rac2/Milr1/Syk/Cd84/Fcer1g/Lyn/Pld2/Il4ra	8
Immune_reactive	GO:0032649	regulation of interferon-gamma production	124/20514	4.75e-06	5.55e-05	3.73e-05	Slc11a1/Laptm5/Lilrb4b/Tlr7/Pycard/Irf8/Vsir/Lgals9/Tlr4	9
Immune_reactive	GO:0007259	receptor signaling pathway via JAK-STAT	197/20514	5.39e-06	6.28e-05	4.22e-05	Il10ra/Csf2rb2/Csf1r/Csf2rb/Ptprc/Hcls1/Lyn/Il10rb/Sh2b3/Ptk2b/Csf2ra	11
Immune_reactive	GO:0060249	anatomical structure homeostasis	323/20514	5.51e-06	6.39e-05	4.3e-05	Fcgr4/Rac2/Csf1r/Ctss/Inpp5d/Syk/Tnfrsf11a/Ptgs1/P2rx7/Spp1/Tcirg1/Tlr4/Ptk2b/Ctsh	14
Immune_reactive	GO:0070372	regulation of ERK1 and ERK2 cascade	325/20514	5.92e-06	6.83e-05	4.6e-05	Csf1r/Ccr1/Trem2/Syk/Ptprc/Tnfrsf11a/Pycard/P2ry6/Lyn/Dab2/Ptpn6/Tlr4/Ptk2b/Sirpa	14
Immune_reactive	GO:0002269	leukocyte activation involved in inflammatory response	46/20514	6.57e-06	7.56e-05	5.08e-05	C1qa/Itgam/Trem2/Tyrobp/Cx3cr1/Tlr4	6
Immune_reactive	GO:2000514	regulation of CD4-positive, alpha-beta T cell activation	70/20514	6.73e-06	7.72e-05	5.19e-05	Cd83/Nfkbid/Nckap1l/Vsir/Lgals9/Il4ra/Tgfbr2	7
Immune_reactive	GO:0002312	B cell activation involved in immune response	98/20514	6.79e-06	7.76e-05	5.22e-05	Ptprc/Spi1/Cd180/Irf8/Plcl2/Tlr4/Ptk2b/Dock10	8
Immune_reactive	GO:0032720	negative regulation of tumor necrosis factor production	71/20514	7.41e-06	8.43e-05	5.67e-05	Trem2/Cd33/Lilrb4b/Vsir/Ptpn6/Tlr4/Sirpa	7
Immune_reactive	GO:0097696	receptor signaling pathway via STAT	204/20514	7.52e-06	8.53e-05	5.74e-05	Il10ra/Csf2rb2/Csf1r/Csf2rb/Ptprc/Hcls1/Lyn/Il10rb/Sh2b3/Ptk2b/Csf2ra	11
Immune_reactive	GO:1903556	negative regulation of tumor necrosis factor superfamily cytokine production	72/20514	8.14e-06	9.2e-05	6.18e-05	Trem2/Cd33/Lilrb4b/Vsir/Ptpn6/Tlr4/Sirpa	7
Immune_reactive	GO:0071902	positive regulation of protein serine/threonine kinase activity	206/20514	8.25e-06	9.29e-05	6.25e-05	Pik3cg/Csf1r/Fgd2/Syk/Ptprc/Tnfrsf11a/Pik3r5/P2rx7/Tlr4/Ptk2b/Prkcd	11
Immune_reactive	GO:0050868	negative regulation of T cell activation	133/20514	8.43e-06	9.46e-05	6.36e-05	Laptm5/Lilrb4b/Nfkbid/Nckap1l/Cd86/Vsir/Ptpn6/Lgals9/Il4ra	9
Immune_reactive	GO:0070302	regulation of stress-activated protein kinase signaling cascade	209/20514	9.46e-06	0.000106	7.12e-05	Fcgr2b/Xdh/Trem2/Spi1/Pycard/Rassf2/Lyn/Dab2/Tlr4/Ptk2b/Sirpa	11
Immune_reactive	GO:0050830	defense response to Gram-positive bacterium	135/20514	9.51e-06	0.000106	7.13e-05	Mpeg1/Myo1f/Lyz2/Ncf1/Pycard/Gbp8/P2rx7/Hck/Tnfaip8	9
Immune_reactive	GO:0061900	glial cell activation	49/20514	9.56e-06	0.000106	7.14e-05	C1qa/Itgam/Trem2/Tyrobp/Cx3cr1/Tlr4	6
Immune_reactive	GO:0050852	T cell receptor signaling pathway	136/20514	1.01e-05	0.000112	7.51e-05	Lcp2/Fyb/Laptm5/Lilrb4b/Nfkbid/Ptprc/Tec/Ptpn6/Ptprj	9
Immune_reactive	GO:0051235	maintenance of location	341/20514	1.02e-05	0.000113	7.57e-05	Trem2/Ptprc/Nrros/Msr1/Srgn/P2ry6/P2rx7/Lyn/Lpl/Ptpn6/Lgals9/Ikbke/Ptk2b/Cyba	14
Immune_reactive	GO:0046633	alpha-beta T cell proliferation	50/20514	1.08e-05	0.000118	7.96e-05	Syk/Ptprc/Dock2/Vsir/Lgals9/Tgfbr2	6
Immune_reactive	GO:0050729	positive regulation of inflammatory response	138/20514	1.14e-05	0.000124	8.37e-05	Pik3cg/Ctss/Trem2/Tnfrsf11a/Fcer1g/Fcgr3/Pycard/Lpl/Tlr4	9
Immune_reactive	GO:0090025	regulation of monocyte chemotaxis	30/20514	1.16e-05	0.000126	8.49e-05	Ccr1/Cx3cr1/Pla2g7/Lyn/Lgmn	5
Immune_reactive	GO:0032370	positive regulation of lipid transport	76/20514	1.17e-05	0.000127	8.54e-05	Tnfrsf11a/P2rx7/Spp1/Dab2/Gal/Prkcd/Ldlrap1	7
Immune_reactive	GO:0002705	positive regulation of leukocyte mediated immunity	176/20514	1.25e-05	0.000135	9.07e-05	Itgam/Trem2/Vav1/Tyrobp/Ptprc/Fcer1g/Fcgr3/Spi1/Itgb2/P2rx7	10
Immune_reactive	GO:0031098	stress-activated protein kinase signaling cascade	257/20514	1.25e-05	0.000135	9.07e-05	Fcgr2b/Xdh/Trem2/Spi1/Tlr7/Pycard/Rassf2/Lyn/Dab2/Tlr4/Ptk2b/Sirpa	12
Immune_reactive	GO:0070304	positive regulation of stress-activated protein kinase signaling cascade	140/20514	1.28e-05	0.000137	9.24e-05	Fcgr2b/Xdh/Spi1/Pycard/Rassf2/Lyn/Dab2/Tlr4/Ptk2b	9
Immune_reactive	GO:0002478	antigen processing and presentation of exogenous peptide antigen	31/20514	1.37e-05	0.000146	9.84e-05	Fcgr2b/Ctss/Fcer1g/Fcgr3/Unc93b1	5
Immune_reactive	GO:0002507	tolerance induction	31/20514	1.37e-05	0.000146	9.84e-05	C3ar1/Lilrb4b/Cd86/Lyn/Tgfbr2	5
Immune_reactive	GO:0002700	regulation of production of molecular mediator of immune response	178/20514	1.38e-05	0.000147	9.86e-05	Fcgr2b/Laptm5/Lilrb4b/Ptprc/Fcer1g/Cd86/Vsir/Tlr4/Il4ra/Tnfrsf1b	10
Immune_reactive	GO:0050798	activated T cell proliferation	53/20514	1.52e-05	0.000161	0.000108	Itgam/Laptm5/Lilrb4b/Itgb2/Cd86/Pycard	6
Immune_reactive	GO:1903038	negative regulation of leukocyte cell-cell adhesion	147/20514	1.89e-05	0.0002	0.000134	Laptm5/Lilrb4b/Nfkbid/Nckap1l/Cd86/Vsir/Ptpn6/Lgals9/Il4ra	9
Immune_reactive	GO:0033209	tumor necrosis factor-mediated signaling pathway	82/20514	1.93e-05	0.000203	0.000136	Syk/Laptm5/Tnfrsf11a/Pycard/Aim2/St18/Ptk2b	7
Immune_reactive	GO:1903532	positive regulation of secretion by cell	361/20514	1.93e-05	0.000203	0.000136	Itgam/Trem2/Cd33/Syk/Tnfrsf11a/Fcer1g/Itgb2/P2rx7/Spp1/Dab2/Pld2/Tlr4/Il4ra/Gal	14
Immune_reactive	GO:0002821	positive regulation of adaptive immune response	149/20514	2.1e-05	0.00022	0.000148	Slc11a1/Clec4n/Trem2/Nfkbid/Ptprc/Fcer1g/Fcgr3/Pycard/P2rx7	9
Immune_reactive	GO:0002431	Fc receptor mediated stimulatory signaling pathway	17/20514	2.16e-05	0.000225	0.000151	Ptprc/Fcer1g/Lyn/Ptprj	4
Immune_reactive	GO:0034134	toll-like receptor 2 signaling pathway	17/20514	2.16e-05	0.000225	0.000151	Pik3ap1/Trem2/Lyn/Cyba	4
Immune_reactive	GO:0045920	negative regulation of exocytosis	34/20514	2.19e-05	0.000227	0.000153	Cd84/Nckap1l/Spi1/Lgals9/Abr	5
Immune_reactive	GO:0051047	positive regulation of secretion	415/20514	2.21e-05	0.000229	0.000154	Itgam/Trem2/Cd33/Syk/Tnfrsf11a/Fcer1g/Itgb2/P2rx7/Spp1/Dab2/Pld2/Tlr4/Il4ra/Gal/Cyba	15
Immune_reactive	GO:0002260	lymphocyte homeostasis	84/20514	2.26e-05	0.000233	0.000157	Nckap1l/P2rx7/Lyn/Mef2c/Slc40a1/Tcirg1/Dock10	7
Immune_reactive	GO:0007249	I-kappaB kinase/NF-kappaB signaling	230/20514	2.31e-05	0.000238	0.00016	Clec4n/Trem2/Lilrb4b/Nfkbid/Cx3cr1/Tlr7/Pycard/Casp8/Prkcb/Tlr4/Sirpa	11
Immune_reactive	GO:0035710	CD4-positive, alpha-beta T cell activation	117/20514	2.5e-05	0.000256	0.000172	Cd83/Nfkbid/Nckap1l/Vsir/Lgals9/Tcirg1/Il4ra/Tgfbr2	8
Immune_reactive	GO:0002758	innate immune response-activating signal transduction	18/20514	2.76e-05	0.000281	0.000189	Clec4n/Tyrobp/Syk/Tlr4	4
Immune_reactive	GO:0019886	antigen processing and presentation of exogenous peptide antigen via MHC class II	18/20514	2.76e-05	0.000281	0.000189	Fcgr2b/Ctss/Fcer1g/Unc93b1	4
Immune_reactive	GO:1900015	regulation of cytokine production involved in inflammatory response	59/20514	2.83e-05	0.000287	0.000193	Trem2/Lilrb4b/Pld4/Pycard/Tlr4/Sirpa	6
Immune_reactive	GO:0019884	antigen processing and presentation of exogenous antigen	37/20514	3.34e-05	0.000338	0.000227	Fcgr2b/Ctss/Fcer1g/Fcgr3/Unc93b1	5
Immune_reactive	GO:0032368	regulation of lipid transport	123/20514	3.58e-05	0.000361	0.000243	Syk/Tnfrsf11a/P2rx7/Spp1/Dab2/Gal/Prkcd/Ldlrap1	8
Immune_reactive	GO:0061515	myeloid cell development	91/20514	3.8e-05	0.000382	0.000257	Csf1r/Itgam/Tyrobp/Nrros/Fli1/Ptpn6/Sh2b3	7
Immune_reactive	GO:0050869	negative regulation of B cell activation	38/20514	3.82e-05	0.000382	0.000257	Fcgr2b/Inpp5d/Tyrobp/Laptm5/Lyn	5
Immune_reactive	GO:0002923	regulation of humoral immune response mediated by circulating immunoglobulin	20/20514	4.3e-05	0.000428	0.000288	Fcgr2b/Trem2/Ptprc/Ptpn6	4
Immune_reactive	GO:0030889	negative regulation of B cell proliferation	20/20514	4.3e-05	0.000428	0.000288	Fcgr2b/Inpp5d/Tyrobp/Lyn	4
Immune_reactive	GO:0051403	stress-activated MAPK cascade	247/20514	4.44e-05	0.000441	0.000296	Fcgr2b/Xdh/Trem2/Spi1/Tlr7/Pycard/Rassf2/Dab2/Tlr4/Ptk2b/Sirpa	11
Immune_reactive	GO:1903307	positive regulation of regulated secretory pathway	64/20514	4.52e-05	0.000447	0.000301	Itgam/Syk/Fcer1g/Itgb2/Pld2/Il4ra	6
Immune_reactive	GO:0046632	alpha-beta T cell differentiation	128/20514	4.77e-05	0.00047	0.000316	Cd83/Syk/Lilrb4b/Nfkbid/Ikzf1/Nckap1l/Il4ra/Tgfbr2	8
Immune_reactive	GO:0032872	regulation of stress-activated MAPK cascade	206/20514	4.82e-05	0.000473	0.000318	Fcgr2b/Xdh/Trem2/Spi1/Pycard/Rassf2/Dab2/Tlr4/Ptk2b/Sirpa	10
Immune_reactive	GO:2000516	positive regulation of CD4-positive, alpha-beta T cell activation	40/20514	4.92e-05	0.000481	0.000324	Cd83/Nfkbid/Nckap1l/Il4ra/Tgfbr2	5
Immune_reactive	GO:0002534	cytokine production involved in inflammatory response	65/20514	4.94e-05	0.000481	0.000324	Trem2/Lilrb4b/Pld4/Pycard/Tlr4/Sirpa	6
Immune_reactive	GO:0032615	interleukin-12 production	65/20514	4.94e-05	0.000481	0.000324	Syk/Laptm5/Unc93b1/Irf8/Tlr4/Prkcd	6
Immune_reactive	GO:0002281	macrophage activation involved in immune response	21/20514	5.27e-05	0.000507	0.000341	Trem2/Tyrobp/Syk/Cx3cr1	4
Immune_reactive	GO:0002577	regulation of antigen processing and presentation	21/20514	5.27e-05	0.000507	0.000341	Slc11a1/Trem2/Pycard/Cd68	4
Immune_reactive	GO:0007252	I-kappaB phosphorylation	21/20514	5.27e-05	0.000507	0.000341	Cx3cr1/Tlr7/Tlr4/Sirpa	4
Immune_reactive	GO:0030852	regulation of granulocyte differentiation	21/20514	5.27e-05	0.000507	0.000341	C1qc/Inpp5d/Ikzf1/Hcls1	4
Immune_reactive	GO:0031343	positive regulation of cell killing	96/20514	5.37e-05	0.000515	0.000346	Itgam/Vav1/Tyrobp/Syk/Ptprc/Spi1/P2rx7	7
Immune_reactive	GO:0032689	negative regulation of interferon-gamma production	41/20514	5.56e-05	0.000532	0.000357	Laptm5/Lilrb4b/Vsir/Lgals9/Tlr4	5
Immune_reactive	GO:1901222	regulation of NIK/NF-kappaB signaling	98/20514	6.13e-05	0.000584	0.000393	Trem2/Laptm5/Spi1/Tlr7/Cd86/Rassf2/Tlr4	7
Immune_reactive	GO:0071404	cellular response to low-density lipoprotein particle stimulus	22/20514	6.39e-05	0.000605	0.000407	Syk/Fcer1g/Itgb2/Lpl	4
Immune_reactive	GO:0090026	positive regulation of monocyte chemotaxis	22/20514	6.39e-05	0.000605	0.000407	Ccr1/Cx3cr1/Pla2g7/Lgmn	4
Immune_reactive	GO:0031638	zymogen activation	99/20514	6.54e-05	0.000618	0.000415	Ifi207/Nlrc4/Pycard/Vsir/Casp8/Lgmn/Ctsh	7
Immune_reactive	GO:0048017	inositol lipid-mediated signaling	173/20514	6.78e-05	0.000637	0.000428	Pik3cg/Pik3ap1/Csf1r/Adap2/Trem2/Hcls1/Ptpn6/Plcl2/Pld2	9
Immune_reactive	GO:1903531	negative regulation of secretion by cell	173/20514	6.78e-05	0.000637	0.000428	Cd84/Nckap1l/Ptgs1/Spi1/Entpd1/Lgals9/Abr/P2ry12/Tnfrsf1b	9
Immune_reactive	GO:0062207	regulation of pattern recognition receptor signaling pathway	100/20514	6.97e-05	0.000653	0.000439	Pik3ap1/Trem2/Slc15a3/Lyn/Tlr4/Cyba/Rab7b	7
Immune_reactive	GO:0032735	positive regulation of interleukin-12 production	43/20514	7.02e-05	0.000656	0.000441	Syk/Laptm5/Unc93b1/Irf8/Tlr4	5
Immune_reactive	GO:0090630	activation of GTPase activity	101/20514	7.42e-05	0.000691	0.000465	Arhgap25/Arhgap45/Rap1gap2/Abr/Gmip/Ptk2b/Grtp1	7
Immune_reactive	GO:0002710	negative regulation of T cell mediated immunity	23/20514	7.67e-05	0.000706	0.000475	Lilrb4b/Ptprc/Nckap1l/Vsir	4
Immune_reactive	GO:0033008	positive regulation of mast cell activation involved in immune response	23/20514	7.67e-05	0.000706	0.000475	Syk/Fcer1g/Pld2/Il4ra	4
Immune_reactive	GO:0033630	positive regulation of cell adhesion mediated by integrin	23/20514	7.67e-05	0.000706	0.000475	Syk/Nckap1l/Ptpn6/P2ry12	4
Immune_reactive	GO:0043306	positive regulation of mast cell degranulation	23/20514	7.67e-05	0.000706	0.000475	Syk/Fcer1g/Pld2/Il4ra	4
Immune_reactive	GO:0034341	response to interferon-gamma	137/20514	7.71e-05	0.000708	0.000476	Slc11a1/Kynu/Gbp8/Irf8/Cxcl16/Tlr4/Sirpa/Rab7b	8
Immune_reactive	GO:0030851	granulocyte differentiation	44/20514	7.86e-05	0.000715	0.000481	C1qc/Inpp5d/Ikzf1/Hcls1/Spi1	5
Immune_reactive	GO:0046640	regulation of alpha-beta T cell proliferation	44/20514	7.86e-05	0.000715	0.000481	Syk/Ptprc/Vsir/Lgals9/Tgfbr2	5
Immune_reactive	GO:0097028	dendritic cell differentiation	44/20514	7.86e-05	0.000715	0.000481	Trem2/Spi1/Lyn/Irf8/Tgfbr2	5
Immune_reactive	GO:0032874	positive regulation of stress-activated MAPK cascade	138/20514	8.12e-05	0.000733	0.000493	Fcgr2b/Xdh/Spi1/Pycard/Rassf2/Dab2/Tlr4/Ptk2b	8
Immune_reactive	GO:0045428	regulation of nitric oxide biosynthetic process	71/20514	8.15e-05	0.000733	0.000493	Cx3cr1/Itgb2/Hrh1/Tlr4/Ptk2b/Sirpa	6
Immune_reactive	GO:1990868	response to chemokine	71/20514	8.15e-05	0.000733	0.000493	Ccr1/Trem2/Dock8/Cx3cr1/Sh2b3/Ptk2b	6
Immune_reactive	GO:1990869	cellular response to chemokine	71/20514	8.15e-05	0.000733	0.000493	Ccr1/Trem2/Dock8/Cx3cr1/Sh2b3/Ptk2b	6
Immune_reactive	GO:0032479	regulation of type I interferon production	103/20514	8.41e-05	0.000754	0.000507	Syk/Tlr7/Pycard/Irf5/Irf8/Tlr4/Sirpa	7
Immune_reactive	GO:0002712	regulation of B cell mediated immunity	72/20514	8.81e-05	0.000786	0.000528	Fcgr2b/Trem2/Ptprc/Fcer1g/Fcgr3/Ptpn6	6
Immune_reactive	GO:0002889	regulation of immunoglobulin mediated immune response	72/20514	8.81e-05	0.000786	0.000528	Fcgr2b/Trem2/Ptprc/Fcer1g/Fcgr3/Ptpn6	6
Immune_reactive	GO:0002456	T cell mediated immunity	140/20514	8.98e-05	0.000798	0.000537	Slc11a1/Lilrb4b/Ptprc/Nckap1l/P2rx7/Vsir/Tnfrsf1b/Ctsh	8
Immune_reactive	GO:0034405	response to fluid shear stress	24/20514	9.13e-05	0.000808	0.000543	P2rx7/Spp1/Mef2c/Ptk2b	4
Immune_reactive	GO:1900016	negative regulation of cytokine production involved in inflammatory response	24/20514	9.13e-05	0.000808	0.000543	Trem2/Lilrb4b/Pycard/Sirpa	4
Immune_reactive	GO:0015844	monoamine transport	105/20514	9.5e-05	0.000837	0.000563	Syk/Fcer1g/Fcgr3/Ptgs1/Entpd1/Prkcb/P2ry12	7
Immune_reactive	GO:0034142	toll-like receptor 4 signaling pathway	46/20514	9.76e-05	0.000858	0.000577	Pik3ap1/Trem2/Lyn/Tlr4/Rab7b	5
Immune_reactive	GO:0002824	positive regulation of adaptive immune response based on somatic recombination of immune receptors built from immunoglobulin superfamily domains	142/20514	9.92e-05	0.000869	0.000585	Slc11a1/Clec4n/Trem2/Nfkbid/Ptprc/Fcer1g/Fcgr3/P2rx7	8
Immune_reactive	GO:0032606	type I interferon production	107/20514	0.000107	0.000935	0.000629	Syk/Tlr7/Pycard/Irf5/Irf8/Tlr4/Sirpa	7
Immune_reactive	GO:0032623	interleukin-2 production	75/20514	0.000111	0.000961	0.000646	Slc11a1/Cd83/Laptm5/Lilrb4b/Ptprc/Fcer1g	6
Immune_reactive	GO:0042130	negative regulation of T cell proliferation	75/20514	0.000111	0.000961	0.000646	Laptm5/Lilrb4b/Cd86/Vsir/Ptpn6/Lgals9	6
Immune_reactive	GO:0080164	regulation of nitric oxide metabolic process	75/20514	0.000111	0.000961	0.000646	Cx3cr1/Itgb2/Hrh1/Tlr4/Ptk2b/Sirpa	6
Immune_reactive	GO:0030218	erythrocyte differentiation	145/20514	0.000115	0.000989	0.000665	Inpp5d/Ikzf1/Hcls1/Nckap1l/Spi1/Lyn/Mafb/Sh2b3	8
Immune_reactive	GO:0050671	positive regulation of lymphocyte proliferation	145/20514	0.000115	0.000989	0.000665	Syk/Ptprc/Nckap1l/Cd86/Pycard/Mef2c/Tlr4/Tgfbr2	8
Immune_reactive	GO:0002357	defense response to tumor cell	10/20514	0.000115	0.000992	0.000667	Laptm5/Abi3/Spi1	3
Immune_reactive	GO:0016485	protein processing	276/20514	0.00012	0.00102329	0.000688	Ifi207/Nlrc4/Ctss/Srgn/Pycard/P2rx7/Vsir/Mafb/Casp8/Lgmn/Ctsh	11
Immune_reactive	GO:0030219	megakaryocyte differentiation	48/20514	0.00012	0.00102329	0.000688	Fli1/Mef2c/Ptpn6/Sh2b3/Rab7b	5
Immune_reactive	GO:0048246	macrophage chemotaxis	48/20514	0.00012	0.00102329	0.000688	C3ar1/Csf1r/Cx3cr1/Ptk2b/Ptprj	5
Immune_reactive	GO:0043254	regulation of protein-containing complex assembly	429/20514	0.000124	0.00105191	0.000707	Trem2/Syk/Ikzf1/Hcls1/Nckap1l/Pycard/Lcp1/Hck/Ikbke/Plek/P2ry12/Tlr4/Ptk2b/Prkcd	14
Immune_reactive	GO:0032946	positive regulation of mononuclear cell proliferation	147/20514	0.000126	0.00106195	0.000714	Syk/Ptprc/Nckap1l/Cd86/Pycard/Mef2c/Tlr4/Tgfbr2	8
Immune_reactive	GO:0060759	regulation of response to cytokine stimulus	147/20514	0.000126	0.00106195	0.000714	Trem2/Syk/Laptm5/Ptprc/Pycard/Ikbke/Tlr4/Sh2b3	8
Immune_reactive	GO:0045780	positive regulation of bone resorption	26/20514	0.000126	0.00106195	0.000714	Fcgr4/Syk/Tnfrsf11a/Spp1	4
Immune_reactive	GO:0050860	negative regulation of T cell receptor signaling pathway	26/20514	0.000126	0.00106195	0.000714	Laptm5/Lilrb4b/Ptpn6/Ptprj	4
Immune_reactive	GO:0098581	detection of external biotic stimulus	26/20514	0.000126	0.00106195	0.000714	Clec4n/Nlrc4/Trem2/Tlr4	4
Immune_reactive	GO:0051607	defense response to virus	278/20514	0.000128	0.00106879	0.000719	Ifi207/Ptprc/Tlr7/Cd86/Pycard/Unc93b1/Itgax/Irf5/Aim2/Apobec1/Il10rb	11
Immune_reactive	GO:0140546	defense response to symbiont	279/20514	0.000132	0.00110007	0.00074	Ifi207/Ptprc/Tlr7/Cd86/Pycard/Unc93b1/Itgax/Irf5/Aim2/Apobec1/Il10rb	11
Immune_reactive	GO:0002673	regulation of acute inflammatory response	49/20514	0.000132	0.00110064	0.00074	Fcgr2b/Pik3cg/Tnfrsf11a/Fcer1g/Fcgr3	5
Immune_reactive	GO:0002920	regulation of humoral immune response	49/20514	0.000132	0.00110064	0.00074	Fcgr2b/Trem2/Ptprc/Ptpn6/Cfh	5
Immune_reactive	GO:0032677	regulation of interleukin-8 production	78/20514	0.000138	0.00114185	0.000768	Cd33/Syk/Ptprc/Tlr7/Pycard/Tlr4	6
Immune_reactive	GO:1902106	negative regulation of leukocyte differentiation	112/20514	0.000142	0.00117716	0.000792	C1qc/Inpp5d/Lilrb4b/Nfkbid/Lyn/Mafb/Il4ra	7
Immune_reactive	GO:0043124	negative regulation of I-kappaB kinase/NF-kappaB signaling	50/20514	0.000146	0.00120351	0.000809	Trem2/Lilrb4b/Nfkbid/Pycard/Casp8	5
Immune_reactive	GO:0060143	positive regulation of syncytium formation by plasma membrane fusion	27/20514	0.000147	0.00121113	0.000814	Cd53/Trem2/Tyrobp/Il4ra	4
Immune_reactive	GO:0032637	interleukin-8 production	79/20514	0.000148	0.00121273	0.000816	Cd33/Syk/Ptprc/Tlr7/Pycard/Tlr4	6
Immune_reactive	GO:0002883	regulation of hypersensitivity	11/20514	0.000157	0.00127088	0.000855	Fcgr2b/Fcer1g/Fcgr3	3
Immune_reactive	GO:0010572	positive regulation of platelet activation	11/20514	0.000157	0.00127088	0.000855	Plek/Tlr4/Ptprj	3
Immune_reactive	GO:0034351	negative regulation of glial cell apoptotic process	11/20514	0.000157	0.00127088	0.000855	Trem2/Prkch/Prkcd	3
Immune_reactive	GO:0045588	positive regulation of gamma-delta T cell differentiation	11/20514	0.000157	0.00127088	0.000855	Syk/Ptprc/Nckap1l	3
Immune_reactive	GO:0046645	positive regulation of gamma-delta T cell activation	11/20514	0.000157	0.00127088	0.000855	Syk/Ptprc/Nckap1l	3
Immune_reactive	GO:0140052	cellular response to oxidised low-density lipoprotein particle stimulus	11/20514	0.000157	0.00127088	0.000855	Trem2/Cd68/Tlr4	3
Immune_reactive	GO:1903707	negative regulation of hemopoiesis	114/20514	0.000159	0.00128108	0.000862	C1qc/Inpp5d/Lilrb4b/Nfkbid/Lyn/Mafb/Il4ra	7
Immune_reactive	GO:0045646	regulation of erythrocyte differentiation	51/20514	0.000161	0.00128869	0.000867	Inpp5d/Nckap1l/Spi1/Lyn/Mafb	5
Immune_reactive	GO:0006816	calcium ion transport	440/20514	0.000161	0.00128869	0.000867	Pik3cg/Ccr1/Cd33/Ptprc/Cd84/P2ry6/P2rx7/Lyn/Hrh1/Ptpn6/Prkcb/P2ry12/Ptk2b/Cyba	14
Immune_reactive	GO:0019722	calcium-mediated signaling	194/20514	0.000162	0.001297	0.000872	Ccr1/Trem2/Syk/Ptprc/Cx3cr1/Fhl2/P2ry12/Ptk2b/Ptprj	9
Immune_reactive	GO:2000116	regulation of cysteine-type endopeptidase activity	239/20514	0.000165	0.00131352	0.000883	Ifi207/Xdh/Nlrc4/Syk/Laptm5/Pycard/Aim2/Casp8/Lgmn/St18	10
Immune_reactive	GO:0051924	regulation of calcium ion transport	287/20514	0.000169	0.00134075	0.000902	Pik3cg/Ccr1/Cd33/Cd84/P2ry6/P2rx7/Lyn/Ptpn6/P2ry12/Ptk2b/Cyba	11
Immune_reactive	GO:0045123	cellular extravasation	81/20514	0.00017	0.00134594	0.000905	Itgam/Cx3cr1/Itgb2/Selplg/Abr/Sirpa	6
Immune_reactive	GO:0001780	neutrophil homeostasis	28/20514	0.000171	0.00134594	0.000905	Fcgr2b/Itgam/Cfh/Sh2b3	4
Immune_reactive	GO:0002675	positive regulation of acute inflammatory response	28/20514	0.000171	0.00134594	0.000905	Pik3cg/Tnfrsf11a/Fcer1g/Fcgr3	4
Immune_reactive	GO:0002367	cytokine production involved in immune response	116/20514	0.000177	0.00139537	0.000938	Slc11a1/Laptm5/Lilrb4b/Fcer1g/Vsir/Tlr4/Tnfrsf1b	7
Immune_reactive	GO:0006874	cellular calcium ion homeostasis	500/20514	0.000179	0.00140253	0.000943	Pik3cg/C3ar1/Ccr1/Ptprc/Cd52/Cx3cr1/P2ry6/P2rx7/Lyn/Spp1/Ptpn6/Tcirg1/Prkcb/Ptk2b/Cyba	15
Immune_reactive	GO:0046434	organophosphate catabolic process	155/20514	0.000182	0.00142481	0.000958	Xdh/Ncf1/Entpd1/Pla2g7/Pld2/Pnpla7/Prkcd/Pla2g15	8
Immune_reactive	GO:0006809	nitric oxide biosynthetic process	83/20514	0.000194	0.00151799	0.00102083	Cx3cr1/Itgb2/Hrh1/Tlr4/Ptk2b/Sirpa	6
Immune_reactive	GO:0001911	negative regulation of leukocyte mediated cytotoxicity	29/20514	0.000196	0.00152244	0.00102382	Ptprc/Cx3cr1/Nckap1l/Lgals9	4
Immune_reactive	GO:0043032	positive regulation of macrophage activation	29/20514	0.000196	0.00152244	0.00102382	Trem2/Lgals9/Tlr4/Il4ra	4
Immune_reactive	GO:0090330	regulation of platelet aggregation	29/20514	0.000196	0.00152244	0.00102382	Syk/Lyn/Sh2b3/Prkcd	4
Immune_reactive	GO:0038061	NIK/NF-kappaB signaling	118/20514	0.000197	0.00152471	0.00102534	Trem2/Laptm5/Spi1/Tlr7/Cd86/Rassf2/Tlr4	7
Immune_reactive	GO:0034101	erythrocyte homeostasis	157/20514	0.000199	0.00153283	0.00103081	Inpp5d/Ikzf1/Hcls1/Nckap1l/Spi1/Lyn/Mafb/Sh2b3	8
Immune_reactive	GO:0051209	release of sequestered calcium ion into cytosol	119/20514	0.000208	0.00156978	0.00105566	Ptprc/P2ry6/P2rx7/Lyn/Ptpn6/Ptk2b/Cyba	7
Immune_reactive	GO:0002223	stimulatory C-type lectin receptor signaling pathway	12/20514	0.000208	0.00156978	0.00105566	Clec4n/Tyrobp/Syk	3
Immune_reactive	GO:0002579	positive regulation of antigen processing and presentation	12/20514	0.000208	0.00156978	0.00105566	Slc11a1/Trem2/Pycard	3
Immune_reactive	GO:0010744	positive regulation of macrophage derived foam cell differentiation	12/20514	0.000208	0.00156978	0.00105566	Msr1/Prkch/Lpl	3
Immune_reactive	GO:0034135	regulation of toll-like receptor 2 signaling pathway	12/20514	0.000208	0.00156978	0.00105566	Trem2/Lyn/Cyba	3
Immune_reactive	GO:0034154	toll-like receptor 7 signaling pathway	12/20514	0.000208	0.00156978	0.00105566	Pik3ap1/Tlr7/Unc93b1	3
Immune_reactive	GO:0038094	Fc-gamma receptor signaling pathway	12/20514	0.000208	0.00156978	0.00105566	Ptprc/Fcer1g/Ptprj	3
Immune_reactive	GO:1903977	positive regulation of glial cell migration	12/20514	0.000208	0.00156978	0.00105566	Trem2/Cx3cr1/P2ry12	3
Immune_reactive	GO:1990840	response to lectin	12/20514	0.000208	0.00156978	0.00105566	Clec4n/Tyrobp/Syk	3
Immune_reactive	GO:1990858	cellular response to lectin	12/20514	0.000208	0.00156978	0.00105566	Clec4n/Tyrobp/Syk	3
Immune_reactive	GO:0042063	gliogenesis	346/20514	0.000217	0.00163108	0.00109688	Csf1r/C1qa/Itgam/Trem2/Nrros/Cx3cr1/Prkch/Lyn/P2ry12/Tlr4/Ptprj/Tnfrsf1b	12
Immune_reactive	GO:0051283	negative regulation of sequestering of calcium ion	120/20514	0.000219	0.00163874	0.00110203	Ptprc/P2ry6/P2rx7/Lyn/Ptpn6/Ptk2b/Cyba	7
Immune_reactive	GO:0034612	response to tumor necrosis factor	202/20514	0.00022	0.00163874	0.00110203	Syk/Laptm5/Tnfrsf11a/Pycard/Aim2/Cxcl16/Casp8/St18/Ptk2b	9
Immune_reactive	GO:0051048	negative regulation of secretion	202/20514	0.00022	0.00163874	0.00110203	Cd84/Nckap1l/Ptgs1/Spi1/Entpd1/Lgals9/Abr/P2ry12/Tnfrsf1b	9
Immune_reactive	GO:0001912	positive regulation of leukocyte mediated cytotoxicity	86/20514	0.000236	0.00175734	0.00118179	Itgam/Vav1/Tyrobp/Ptprc/Spi1/P2rx7	6
Immune_reactive	GO:0010563	negative regulation of phosphorus metabolic process	457/20514	0.000237	0.00175884	0.0011828	Xdh/Lilrb4b/Ptprc/Nckap1l/Pycard/Rassf2/Entpd1/Lyn/Ptpn6/Plek/Sh2b3/Ptprj/Sirpa/Prkcd	14
Immune_reactive	GO:0045936	negative regulation of phosphate metabolic process	457/20514	0.000237	0.00175884	0.0011828	Xdh/Lilrb4b/Ptprc/Nckap1l/Pycard/Rassf2/Entpd1/Lyn/Ptpn6/Plek/Sh2b3/Ptprj/Sirpa/Prkcd	14
Immune_reactive	GO:0051282	regulation of sequestering of calcium ion	122/20514	0.000242	0.0017895	0.00120342	Ptprc/P2ry6/P2rx7/Lyn/Ptpn6/Ptk2b/Cyba	7
Immune_reactive	GO:0002762	negative regulation of myeloid leukocyte differentiation	56/20514	0.000251	0.00184934	0.00124366	C1qc/Inpp5d/Lilrb4b/Lyn/Mafb	5
Immune_reactive	GO:0031334	positive regulation of protein-containing complex assembly	206/20514	0.000254	0.00186899	0.00125687	Syk/Ikzf1/Nckap1l/Pycard/Lcp1/Plek/P2ry12/Tlr4/Ptk2b	9
Immune_reactive	GO:0032691	negative regulation of interleukin-1 beta production	31/20514	0.000256	0.00187939	0.00126386	Trem2/Cd33/Lilrb4b/Cx3cr1	4
Immune_reactive	GO:0007204	positive regulation of cytosolic calcium ion concentration	354/20514	0.000267	0.00193789	0.00130321	Pik3cg/C3ar1/Ccr1/Ptprc/Cd52/Cx3cr1/P2ry6/P2rx7/Lyn/Ptpn6/Ptk2b/Cyba	12
Immune_reactive	GO:0002286	T cell activation involved in immune response	124/20514	0.000267	0.00193789	0.00130321	Slc11a1/Nfkbid/Fcer1g/Nckap1l/Apbb1ip/Lcp1/Il4ra	7
Immune_reactive	GO:0051208	sequestering of calcium ion	124/20514	0.000267	0.00193789	0.00130321	Ptprc/P2ry6/P2rx7/Lyn/Ptpn6/Ptk2b/Cyba	7
Immune_reactive	GO:0002524	hypersensitivity	13/20514	0.000269	0.00193789	0.00130321	Fcgr2b/Fcer1g/Fcgr3	3
Immune_reactive	GO:0002664	regulation of T cell tolerance induction	13/20514	0.000269	0.00193789	0.00130321	Lilrb4b/Cd86/Tgfbr2	3
Immune_reactive	GO:0036005	response to macrophage colony-stimulating factor	13/20514	0.000269	0.00193789	0.00130321	Csf1r/Trem2/Tlr4	3
Immune_reactive	GO:0036006	cellular response to macrophage colony-stimulating factor stimulus	13/20514	0.000269	0.00193789	0.00130321	Csf1r/Trem2/Tlr4	3
Immune_reactive	GO:0060368	regulation of Fc receptor mediated stimulatory signaling pathway	13/20514	0.000269	0.00193789	0.00130321	Ptprc/Lyn/Ptprj	3
Immune_reactive	GO:0043030	regulation of macrophage activation	57/20514	0.000273	0.00195156	0.0013124	Trem2/Cd84/Lgals9/Tlr4/Il4ra	5
Immune_reactive	GO:0050732	negative regulation of peptidyl-tyrosine phosphorylation	57/20514	0.000273	0.00195156	0.0013124	Lilrb4b/Ptprc/Ptpn6/Sh2b3/Prkcd	5
Immune_reactive	GO:0140353	lipid export from cell	57/20514	0.000273	0.00195156	0.0013124	Tnfrsf11a/P2rx7/Spp1/Dab2/Gal	5
Immune_reactive	GO:0052548	regulation of endopeptidase activity	356/20514	0.000281	0.00201	0.0013517	Ifi207/Xdh/Nlrc4/Syk/Laptm5/Pycard/Lyn/Vsir/Aim2/Casp8/Lgmn/St18	12
Immune_reactive	GO:0046209	nitric oxide metabolic process	89/20514	0.000284	0.00202775	0.00136364	Cx3cr1/Itgb2/Hrh1/Tlr4/Ptk2b/Sirpa	6
Immune_reactive	GO:0002313	mature B cell differentiation involved in immune response	32/20514	0.00029	0.00205933	0.00138487	Spi1/Irf8/Ptk2b/Dock10	4
Immune_reactive	GO:0043372	positive regulation of CD4-positive, alpha-beta T cell differentiation	32/20514	0.00029	0.00205933	0.00138487	Cd83/Nfkbid/Nckap1l/Il4ra	4
Immune_reactive	GO:0006956	complement activation	58/20514	0.000296	0.00208996	0.00140547	C1qb/C1qc/C1qa/Trem2/Cfh	5
Immune_reactive	GO:0009395	phospholipid catabolic process	58/20514	0.000296	0.00208996	0.00140547	Pla2g7/Pld2/Pnpla7/Prkcd/Pla2g15	5
Immune_reactive	GO:0045638	negative regulation of myeloid cell differentiation	90/20514	0.000302	0.00212584	0.0014296	C1qc/Inpp5d/Lilrb4b/Lyn/Mafb/Ptk2b	6
Immune_reactive	GO:0050871	positive regulation of B cell activation	90/20514	0.000302	0.00212584	0.0014296	Inpp5d/Syk/Ptprc/Nckap1l/Mef2c/Tlr4	6
Immune_reactive	GO:0043280	positive regulation of cysteine-type endopeptidase activity involved in apoptotic process	127/20514	0.000309	0.00217161	0.00146038	Xdh/Nlrc4/Syk/Laptm5/Pycard/Casp8/St18	7
Immune_reactive	GO:0071622	regulation of granulocyte chemotaxis	59/20514	0.000321	0.00224207	0.00150776	Rac2/C3ar1/Csf1r/Nckap1l/Ptprj	5
Immune_reactive	GO:2001057	reactive nitrogen species metabolic process	91/20514	0.000321	0.00224207	0.00150776	Cx3cr1/Itgb2/Hrh1/Tlr4/Ptk2b/Sirpa	6
Immune_reactive	GO:1904646	cellular response to amyloid-beta	33/20514	0.000328	0.00227899	0.00153259	Fcgr2b/Trem2/Lgmn/Tlr4	4
Immune_reactive	GO:2000108	positive regulation of leukocyte apoptotic process	33/20514	0.000328	0.00227899	0.00153259	Nfkbid/P2rx7/Lyn/Mef2c	4
Immune_reactive	GO:0045586	regulation of gamma-delta T cell differentiation	14/20514	0.00034	0.00234654	0.00157802	Syk/Ptprc/Nckap1l	3
Immune_reactive	GO:0046643	regulation of gamma-delta T cell activation	14/20514	0.00034	0.00234654	0.00157802	Syk/Ptprc/Nckap1l	3
Immune_reactive	GO:2000561	regulation of CD4-positive, alpha-beta T cell proliferation	14/20514	0.00034	0.00234654	0.00157802	Vsir/Lgals9/Tgfbr2	3
Immune_reactive	GO:0048015	phosphatidylinositol-mediated signaling	170/20514	0.00034	0.0023478	0.00157887	Pik3cg/Pik3ap1/Csf1r/Trem2/Hcls1/Ptpn6/Plcl2/Pld2	8
Immune_reactive	GO:0002548	monocyte chemotaxis	60/20514	0.000347	0.00238686	0.00160513	Ccr1/Cx3cr1/Pla2g7/Lyn/Lgmn	5
Immune_reactive	GO:0010758	regulation of macrophage chemotaxis	34/20514	0.000368	0.00251288	0.00168988	C3ar1/Csf1r/Ptk2b/Ptprj	4
Immune_reactive	GO:0031342	negative regulation of cell killing	34/20514	0.000368	0.00251288	0.00168988	Ptprc/Cx3cr1/Nckap1l/Lgals9	4
Immune_reactive	GO:0045672	positive regulation of osteoclast differentiation	34/20514	0.000368	0.00251288	0.00168988	Csf1r/Ccr1/Trem2/Tyrobp	4
Immune_reactive	GO:0070269	pyroptosis	34/20514	0.000368	0.00251288	0.00168988	Nlrc4/Trem2/Aim2/Casp8	4
Immune_reactive	GO:0032956	regulation of actin cytoskeleton organization	367/20514	0.00037	0.00251997	0.00169465	Rac2/Csf1r/Myo1f/Hcls1/Nckap1l/Arhgdib/Pycard/Hck/Mef2c/Plek/Ptk2b/Prkcd	12
Immune_reactive	GO:0070098	chemokine-mediated signaling pathway	61/20514	0.000375	0.00254567	0.00171193	Ccr1/Trem2/Cx3cr1/Sh2b3/Ptk2b	5
Immune_reactive	GO:0043407	negative regulation of MAP kinase activity	62/20514	0.000404	0.00274063	0.00184304	Lyn/Ptpn6/Sh2b3/Ptprj/Prkcd	5
Immune_reactive	GO:0002861	regulation of inflammatory response to antigenic stimulus	35/20514	0.000413	0.0027613	0.00185694	Fcgr2b/Trem2/Fcer1g/Fcgr3	4
Immune_reactive	GO:0006958	complement activation, classical pathway	35/20514	0.000413	0.0027613	0.00185694	C1qb/C1qc/C1qa/Trem2	4
Immune_reactive	GO:0033005	positive regulation of mast cell activation	35/20514	0.000413	0.0027613	0.00185694	Syk/Fcer1g/Pld2/Il4ra	4
Immune_reactive	GO:0034122	negative regulation of toll-like receptor signaling pathway	35/20514	0.000413	0.0027613	0.00185694	Pik3ap1/Trem2/Lyn/Rab7b	4
Immune_reactive	GO:0036037	CD8-positive, alpha-beta T cell activation	35/20514	0.000413	0.0027613	0.00185694	Wdfy4/Lilrb4b/Nckap1l/Vsir	4
Immune_reactive	GO:0060142	regulation of syncytium formation by plasma membrane fusion	35/20514	0.000413	0.0027613	0.00185694	Cd53/Trem2/Tyrobp/Il4ra	4
Immune_reactive	GO:0002517	T cell tolerance induction	15/20514	0.000421	0.00279544	0.0018799	Lilrb4b/Cd86/Tgfbr2	3
Immune_reactive	GO:0033004	negative regulation of mast cell activation	15/20514	0.000421	0.00279544	0.0018799	Milr1/Cd84/Ptpn6	3
Immune_reactive	GO:0034350	regulation of glial cell apoptotic process	15/20514	0.000421	0.00279544	0.0018799	Trem2/Prkch/Prkcd	3
Immune_reactive	GO:0034638	phosphatidylcholine catabolic process	15/20514	0.000421	0.00279544	0.0018799	Pla2g7/Pnpla7/Pla2g15	3
Immune_reactive	GO:0032655	regulation of interleukin-12 production	63/20514	0.000436	0.00287877	0.00193593	Syk/Laptm5/Unc93b1/Irf8/Tlr4	5
Immune_reactive	GO:0035306	positive regulation of dephosphorylation	63/20514	0.000436	0.00287877	0.00193593	Cd33/Ptprc/Mef2c/Plek/Prkcd	5
Immune_reactive	GO:0007264	small GTPase mediated signal transduction	431/20514	0.000458	0.00301828	0.00202976	Pik3cg/Arhgap25/Rac2/Cyth4/Arhgap30/Vav1/Dock2/Dock8/Arhgdib/Rapgef5/Stard8/Rap1gap2/Dock10	13
Immune_reactive	GO:0009595	detection of biotic stimulus	36/20514	0.000461	0.00301828	0.00202976	Clec4n/Nlrc4/Trem2/Tlr4	4
Immune_reactive	GO:0010922	positive regulation of phosphatase activity	36/20514	0.000461	0.00301828	0.00202976	Cd33/Ptprc/Mef2c/Plek	4
Immune_reactive	GO:0097242	amyloid-beta clearance	36/20514	0.000461	0.00301828	0.00202976	Itgam/Trem2/Msr1/Itgb2	4
Immune_reactive	GO:0001959	regulation of cytokine-mediated signaling pathway	136/20514	0.000468	0.00306287	0.00205974	Trem2/Syk/Laptm5/Ptprc/Pycard/Ikbke/Sh2b3	7
Immune_reactive	GO:0002718	regulation of cytokine production involved in immune response	98/20514	0.000478	0.00311977	0.00209801	Laptm5/Lilrb4b/Fcer1g/Vsir/Tlr4/Tnfrsf1b	6
Immune_reactive	GO:0007254	JNK cascade	179/20514	0.00048	0.00312872	0.00210402	Fcgr2b/Tlr7/Pycard/Rassf2/Dab2/Tlr4/Ptk2b/Sirpa	8
Immune_reactive	GO:0031623	receptor internalization	138/20514	0.000511	0.0033109	0.00222654	Syk/Lilrb4b/Fcer1g/Itgb2/Dab2/Pld2/Ldlrap1	7
Immune_reactive	GO:0042832	defense response to protozoan	37/20514	0.000512	0.0033109	0.00222654	Slc11a1/Gbp8/Irf8/Il4ra	4
Immune_reactive	GO:0045577	regulation of B cell differentiation	37/20514	0.000512	0.0033109	0.00222654	Inpp5d/Syk/Nckap1l/Ptpn6	4
Immune_reactive	GO:0001820	serotonin secretion	16/20514	0.000515	0.0033109	0.00222654	Syk/Fcer1g/Fcgr3	3
Immune_reactive	GO:0034162	toll-like receptor 9 signaling pathway	16/20514	0.000515	0.0033109	0.00222654	Pik3ap1/Unc93b1/Rab7b	3
Immune_reactive	GO:0035739	CD4-positive, alpha-beta T cell proliferation	16/20514	0.000515	0.0033109	0.00222654	Vsir/Lgals9/Tgfbr2	3
Immune_reactive	GO:0070374	positive regulation of ERK1 and ERK2 cascade	227/20514	0.000516	0.00331321	0.00222809	Csf1r/Ccr1/Trem2/Ptprc/Tnfrsf11a/Pycard/P2ry6/Tlr4/Ptk2b	9
Immune_reactive	GO:0046486	glycerolipid metabolic process	382/20514	0.000529	0.00338872	0.00227887	Pik3cg/Csf1r/Inpp5d/Pla2g7/Lpl/Apobec1/Plek/Lpcat2/Pld2/Pnpla7/Pla2g15/Mtmr12	12
Immune_reactive	GO:0006650	glycerophospholipid metabolic process	278/20514	0.000547	0.00349847	0.00235268	Pik3cg/Csf1r/Inpp5d/Pla2g7/Plek/Lpcat2/Pld2/Pnpla7/Pla2g15/Mtmr12	10
Immune_reactive	GO:0045766	positive regulation of angiogenesis	183/20514	0.000556	0.00354095	0.00238124	C3ar1/Cx3cr1/Itgb2/Itgax/Prkcb/Ptk2b/Tgfbr2/Ctsh	8
Immune_reactive	GO:1904018	positive regulation of vasculature development	183/20514	0.000556	0.00354095	0.00238124	C3ar1/Cx3cr1/Itgb2/Itgax/Prkcb/Ptk2b/Tgfbr2/Ctsh	8
Immune_reactive	GO:0032147	activation of protein kinase activity	101/20514	0.000561	0.00356795	0.0023994	Slc11a1/Cd86/Tlr4/Ptk2b/Tgfbr2/Prkcd	6
Immune_reactive	GO:0052547	regulation of peptidase activity	441/20514	0.000568	0.00358943	0.00241384	Ifi207/Xdh/Nlrc4/Syk/Laptm5/Pycard/Lyn/Vsir/Aim2/Casp8/Lgmn/St18/Ctsh	13
Immune_reactive	GO:0001773	myeloid dendritic cell activation	38/20514	0.000568	0.00358943	0.00241384	Dock2/Spi1/Pycard/Tgfbr2	4
Immune_reactive	GO:0045589	regulation of regulatory T cell differentiation	38/20514	0.000568	0.00358943	0.00241384	Lilrb4b/Vsir/Lgals9/Sh2b3	4
Immune_reactive	GO:0034765	regulation of ion transmembrane transport	499/20514	0.000571	0.00360161	0.00242204	Pik3cg/Ctss/Trem2/Cybb/P2ry6/P2rx7/Lyn/Mef2c/Ptpn6/Tcirg1/Kcnk13/Ptk2b/Gal/Cyba	14
Immune_reactive	GO:0045921	positive regulation of exocytosis	102/20514	0.000592	0.00372218	0.00250312	Itgam/Syk/Fcer1g/Itgb2/Pld2/Il4ra	6
Immune_reactive	GO:0002220	innate immune response activating cell surface receptor signaling pathway	17/20514	0.00062	0.00384996	0.00258904	Clec4n/Tyrobp/Syk	3
Immune_reactive	GO:0002468	dendritic cell antigen processing and presentation	17/20514	0.00062	0.00384996	0.00258904	Fcgr4/Slc11a1/Cd68	3
Immune_reactive	GO:0010919	regulation of inositol phosphate biosynthetic process	17/20514	0.00062	0.00384996	0.00258904	P2ry6/Plek/Ptk2b	3
Immune_reactive	GO:0038093	Fc receptor signaling pathway	17/20514	0.00062	0.00384996	0.00258904	Ptprc/Fcer1g/Ptprj	3
Immune_reactive	GO:0045342	MHC class II biosynthetic process	17/20514	0.00062	0.00384996	0.00258904	Slc11a1/Spi1/Tlr4	3
Immune_reactive	GO:0071498	cellular response to fluid shear stress	17/20514	0.00062	0.00384996	0.00258904	Spp1/Mef2c/Ptk2b	3
Immune_reactive	GO:0097006	regulation of plasma lipoprotein particle levels	68/20514	0.00062	0.00384996	0.00258904	Trem2/Msr1/Pla2g7/Lpl/Ldlrap1	5
Immune_reactive	GO:0032692	negative regulation of interleukin-1 production	39/20514	0.000628	0.00386794	0.00260114	Trem2/Cd33/Lilrb4b/Cx3cr1	4
Immune_reactive	GO:0033028	myeloid cell apoptotic process	39/20514	0.000628	0.00386794	0.00260114	Fcgr2b/Itgam/Fcer1g/Mef2c	4
Immune_reactive	GO:1904645	response to amyloid-beta	39/20514	0.000628	0.00386794	0.00260114	Fcgr2b/Trem2/Lgmn/Tlr4	4
Immune_reactive	GO:2000403	positive regulation of lymphocyte migration	39/20514	0.000628	0.00386794	0.00260114	Dock8/Pycard/Lgals9/Ptk2b	4
Immune_reactive	GO:0010959	regulation of metal ion transport	446/20514	0.00063	0.00387405	0.00260525	Pik3cg/Ccr1/Trem2/Cd33/Cd84/P2ry6/P2rx7/Lyn/Ptpn6/P2ry12/Ptk2b/Gal/Cyba	13
Immune_reactive	GO:0050728	negative regulation of inflammatory response	143/20514	0.000632	0.00387808	0.00260796	Fcgr2b/Trem2/Aoah/Cx3cr1/Lgals9/Abr/Tnfrsf1b	7
Immune_reactive	GO:0010876	lipid localization	447/20514	0.000644	0.00393996	0.00264957	Trem2/Syk/Tnfrsf11a/Msr1/Abcc3/P2rx7/Lpl/Spp1/Dab2/Ikbke/Gal/Prkcd/Ldlrap1	13
Immune_reactive	GO:0002709	regulation of T cell mediated immunity	104/20514	0.000656	0.00399806	0.00268865	Lilrb4b/Ptprc/Nckap1l/P2rx7/Vsir/Tnfrsf1b	6
Immune_reactive	GO:0046330	positive regulation of JNK cascade	104/20514	0.000656	0.00399806	0.00268865	Fcgr2b/Pycard/Rassf2/Dab2/Tlr4/Ptk2b	6
Immune_reactive	GO:1901224	positive regulation of NIK/NF-kappaB signaling	69/20514	0.000663	0.00403256	0.00271185	Trem2/Laptm5/Tlr7/Cd86/Tlr4	5
Immune_reactive	GO:1901214	regulation of neuron death	392/20514	0.000664	0.00403256	0.00271185	Fcgr2b/C1qa/Itgam/Trem2/Tyrobp/Cx3cr1/Mef2c/Casp8/Lgmn/Tlr4/Ptk2b/Tnfrsf1b	12
Immune_reactive	GO:0001562	response to protozoan	40/20514	0.000692	0.00418266	0.00281279	Slc11a1/Gbp8/Irf8/Il4ra	4
Immune_reactive	GO:0001782	B cell homeostasis	40/20514	0.000692	0.00418266	0.00281279	Nckap1l/Lyn/Mef2c/Dock10	4
Immune_reactive	GO:0034110	regulation of homotypic cell-cell adhesion	40/20514	0.000692	0.00418266	0.00281279	Syk/Lyn/Sh2b3/Prkcd	4
Immune_reactive	GO:0009620	response to fungus	70/20514	0.000709	0.00425604	0.00286213	Clec4n/Syk/Cx3cr1/Ncf1/Spi1	5
Immune_reactive	GO:0034121	regulation of toll-like receptor signaling pathway	70/20514	0.000709	0.00425604	0.00286213	Pik3ap1/Trem2/Lyn/Cyba/Rab7b	5
Immune_reactive	GO:0046503	glycerolipid catabolic process	70/20514	0.000709	0.00425604	0.00286213	Pik3cg/Pla2g7/Lpl/Pnpla7/Pla2g15	5
Immune_reactive	GO:0002526	acute inflammatory response	106/20514	0.000725	0.00434534	0.00292219	Fcgr2b/Pik3cg/Tnfrsf11a/Fcer1g/Fcgr3/Prcp	6
Immune_reactive	GO:0002864	regulation of acute inflammatory response to antigenic stimulus	18/20514	0.000739	0.00441083	0.00296623	Fcgr2b/Fcer1g/Fcgr3	3
Immune_reactive	GO:0042492	gamma-delta T cell differentiation	18/20514	0.000739	0.00441083	0.00296623	Syk/Ptprc/Nckap1l	3
Immune_reactive	GO:0051604	protein maturation	342/20514	0.000741	0.00441083	0.00296623	Ifi207/Nlrc4/Ctss/Srgn/Pycard/P2rx7/Vsir/Mafb/Casp8/Lgmn/Ctsh	11
Immune_reactive	GO:0051480	regulation of cytosolic calcium ion concentration	397/20514	0.000741	0.00441083	0.00296623	Pik3cg/C3ar1/Ccr1/Ptprc/Cd52/Cx3cr1/P2ry6/P2rx7/Lyn/Ptpn6/Ptk2b/Cyba	12
Immune_reactive	GO:0048661	positive regulation of smooth muscle cell proliferation	107/20514	0.000762	0.00451411	0.00303568	C3ar1/P2ry6/Tlr4/Tgfbr2/Cyba/Ldlrap1	6
Immune_reactive	GO:0043122	regulation of I-kappaB kinase/NF-kappaB signaling	192/20514	0.000762	0.00451411	0.00303568	Clec4n/Trem2/Lilrb4b/Nfkbid/Pycard/Casp8/Prkcb/Tlr4	8
Immune_reactive	GO:0031348	negative regulation of defense response	240/20514	0.000768	0.00454603	0.00305714	Ifi207/Fcgr2b/Ccr1/Trem2/Aoah/Cx3cr1/Lgals9/Abr/Tnfrsf1b	9
Immune_reactive	GO:0042102	positive regulation of T cell proliferation	108/20514	0.0008	0.0047224	0.00317575	Syk/Ptprc/Nckap1l/Cd86/Pycard/Tgfbr2	6
Immune_reactive	GO:0002437	inflammatory response to antigenic stimulus	72/20514	0.000806	0.00475066	0.00319476	Fcgr2b/Trem2/Fcer1g/Fcgr3/Cd68	5
Immune_reactive	GO:0045066	regulatory T cell differentiation	42/20514	0.000835	0.00489339	0.00329074	Lilrb4b/Vsir/Lgals9/Sh2b3	4
Immune_reactive	GO:0098751	bone cell development	42/20514	0.000835	0.00489339	0.00329074	Tyrobp/Fli1/Ptpn6/Sh2b3	4
Immune_reactive	GO:2000249	regulation of actin cytoskeleton reorganization	42/20514	0.000835	0.00489339	0.00329074	Csf1r/Arhgdib/Hck/Ptk2b	4
Immune_reactive	GO:0046777	protein autophosphorylation	243/20514	0.000839	0.00490129	0.00329605	Csf1r/Syk/Ptprc/Rassf2/Tec/Lyn/Hck/Ptk2b/Prkcd	9
Immune_reactive	GO:0071901	negative regulation of protein serine/threonine kinase activity	109/20514	0.000839	0.00490129	0.00329605	Pycard/Lyn/Ptpn6/Sh2b3/Ptprj/Prkcd	6
Immune_reactive	GO:0098586	cellular response to virus	73/20514	0.000858	0.00500281	0.00336432	Wdfy4/Tlr7/Pou2f2/Lgals9/Ikbke	5
Immune_reactive	GO:0032700	negative regulation of interleukin-17 production	19/20514	0.000871	0.00503662	0.00338706	Nckap1l/Vsir/Tlr4	3
Immune_reactive	GO:0033604	negative regulation of catecholamine secretion	19/20514	0.000871	0.00503662	0.00338706	Ptgs1/Entpd1/P2ry12	3
Immune_reactive	GO:0045579	positive regulation of B cell differentiation	19/20514	0.000871	0.00503662	0.00338706	Inpp5d/Syk/Nckap1l	3
Immune_reactive	GO:2001185	regulation of CD8-positive, alpha-beta T cell activation	19/20514	0.000871	0.00503662	0.00338706	Lilrb4b/Nckap1l/Vsir	3
Immune_reactive	GO:0046328	regulation of JNK cascade	151/20514	0.000872	0.00503662	0.00338706	Fcgr2b/Pycard/Rassf2/Dab2/Tlr4/Ptk2b/Sirpa	7
Immune_reactive	GO:0010522	regulation of calcium ion transport into cytosol	111/20514	0.000923	0.00532129	0.0035785	P2ry6/P2rx7/Lyn/Ptpn6/Ptk2b/Cyba	6
Immune_reactive	GO:0001933	negative regulation of protein phosphorylation	353/20514	0.000959	0.00551854	0.00371115	Xdh/Lilrb4b/Ptprc/Pycard/Rassf2/Lyn/Ptpn6/Sh2b3/Ptprj/Sirpa/Prkcd	11
Immune_reactive	GO:0014068	positive regulation of phosphatidylinositol 3-kinase signaling	75/20514	0.00097	0.00557382	0.00374832	Pik3ap1/Trem2/Hcls1/Ptpn6/Pld2	5
Immune_reactive	GO:0030890	positive regulation of B cell proliferation	44/20514	0.000997	0.00571528	0.00384345	Ptprc/Nckap1l/Mef2c/Tlr4	4
Immune_reactive	GO:0097553	calcium ion transmembrane import into cytosol	155/20514	0.00101622	0.00577903	0.00388632	Ptprc/P2ry6/P2rx7/Lyn/Ptpn6/Ptk2b/Cyba	7
Immune_reactive	GO:0002755	MyD88-dependent toll-like receptor signaling pathway	20/20514	0.00101704	0.00577903	0.00388632	Tlr13/Tlr7/Tlr4	3
Immune_reactive	GO:0030502	negative regulation of bone mineralization	20/20514	0.00101704	0.00577903	0.00388632	Ccr1/Srgn/Ptk2b	3
Immune_reactive	GO:0034349	glial cell apoptotic process	20/20514	0.00101704	0.00577903	0.00388632	Trem2/Prkch/Prkcd	3
Immune_reactive	GO:0050665	hydrogen peroxide biosynthetic process	20/20514	0.00101704	0.00577903	0.00388632	Cybb/Ncf1/Cyba	3
Immune_reactive	GO:0050829	defense response to Gram-negative bacterium	114/20514	0.00106045	0.0060149	0.00404494	Mpeg1/Slc11a1/Trem2/Lyz2/Pycard/Tlr4	6
Immune_reactive	GO:0046006	regulation of activated T cell proliferation	45/20514	0.00108548	0.00614099	0.00412973	Laptm5/Lilrb4b/Cd86/Pycard	4
Immune_reactive	GO:0032970	regulation of actin filament-based process	415/20514	0.00108656	0.00614099	0.00412973	Rac2/Csf1r/Myo1f/Hcls1/Nckap1l/Arhgdib/Pycard/Hck/Mef2c/Plek/Ptk2b/Prkcd	12
Immune_reactive	GO:0006469	negative regulation of protein kinase activity	203/20514	0.00109165	0.00615878	0.0041417	Lilrb4b/Ptprc/Pycard/Lyn/Ptpn6/Sh2b3/Ptprj/Prkcd	8
Immune_reactive	GO:0006919	activation of cysteine-type endopeptidase activity involved in apoptotic process	78/20514	0.00115835	0.00652344	0.00438693	Xdh/Nlrc4/Laptm5/Pycard/Casp8	5
Immune_reactive	GO:0045765	regulation of angiogenesis	307/20514	0.00116623	0.00654967	0.00440457	C3ar1/Stab1/Cx3cr1/Itgb2/Itgax/Prkcb/Sh2b3/Ptk2b/Tgfbr2/Ctsh	10
Immune_reactive	GO:0002643	regulation of tolerance induction	21/20514	0.00117776	0.00654967	0.00440457	Lilrb4b/Cd86/Tgfbr2	3
Immune_reactive	GO:0044546	NLRP3 inflammasome complex assembly	21/20514	0.00117776	0.00654967	0.00440457	Trem2/Aim2/Tlr4	3
Immune_reactive	GO:0045649	regulation of macrophage differentiation	21/20514	0.00117776	0.00654967	0.00440457	C1qc/Hcls1/Casp8	3
Immune_reactive	GO:0046629	gamma-delta T cell activation	21/20514	0.00117776	0.00654967	0.00440457	Syk/Ptprc/Nckap1l	3
Immune_reactive	GO:1903975	regulation of glial cell migration	21/20514	0.00117776	0.00654967	0.00440457	Trem2/Cx3cr1/P2ry12	3
Immune_reactive	GO:0030279	negative regulation of ossification	46/20514	0.00117956	0.00654967	0.00440457	Ccr1/Srgn/Mef2c/Ptk2b	4
Immune_reactive	GO:1900077	negative regulation of cellular response to insulin stimulus	46/20514	0.00117956	0.00654967	0.00440457	Lpl/Prkcb/Ptprj/Prkcd	4
Immune_reactive	GO:0019932	second-messenger-mediated signaling	308/20514	0.00119498	0.00662366	0.00445433	Ccr1/Trem2/Syk/Ptprc/Cx3cr1/Fhl2/P2ry12/Ptk2b/Ptprj/Gal	10
Immune_reactive	GO:0060348	bone development	256/20514	0.00120863	0.00668759	0.00449731	Tyrobp/Ptprc/Fli1/Mef2c/Ptpn6/Cfh/Trim45/Sh2b3/Tgfbr2	9
Immune_reactive	GO:0062208	positive regulation of pattern recognition receptor signaling pathway	47/20514	0.00127921	0.0070658	0.00475166	Pik3ap1/Slc15a3/Tlr4/Cyba	4
Immune_reactive	GO:0006644	phospholipid metabolic process	366/20514	0.00128215	0.00706969	0.00475427	Pik3cg/Csf1r/Inpp5d/Pla2g7/Plek/Lpcat2/Pld2/Pnpla7/Prkcd/Pla2g15/Mtmr12	11
Immune_reactive	GO:1901342	regulation of vasculature development	311/20514	0.00128474	0.00707164	0.00475558	C3ar1/Stab1/Cx3cr1/Itgb2/Itgax/Prkcb/Sh2b3/Ptk2b/Tgfbr2/Ctsh	10
Immune_reactive	GO:0070228	regulation of lymphocyte apoptotic process	80/20514	0.00129783	0.00713128	0.00479569	Nfkbid/Dock8/P2rx7/Lyn/Casp8	5
Immune_reactive	GO:0010743	regulation of macrophage derived foam cell differentiation	22/20514	0.00135364	0.00736128	0.00495037	Msr1/Prkch/Lpl	3
Immune_reactive	GO:0010885	regulation of cholesterol storage	22/20514	0.00135364	0.00736128	0.00495037	Trem2/Msr1/Lpl	3
Immune_reactive	GO:0034143	regulation of toll-like receptor 4 signaling pathway	22/20514	0.00135364	0.00736128	0.00495037	Trem2/Lyn/Rab7b	3
Immune_reactive	GO:0045591	positive regulation of regulatory T cell differentiation	22/20514	0.00135364	0.00736128	0.00495037	Lilrb4b/Vsir/Lgals9	3
Immune_reactive	GO:0061081	positive regulation of myeloid leukocyte cytokine production involved in immune response	22/20514	0.00135364	0.00736128	0.00495037	Laptm5/Fcer1g/Tlr4	3
Immune_reactive	GO:0061760	antifungal innate immune response	22/20514	0.00135364	0.00736128	0.00495037	Clec4n/Cx3cr1/Spi1	3
Immune_reactive	GO:0021782	glial cell development	120/20514	0.00138193	0.00750223	0.00504515	Csf1r/C1qa/Itgam/Trem2/Nrros/Tlr4	6
Immune_reactive	GO:0045429	positive regulation of nitric oxide biosynthetic process	48/20514	0.0013846	0.00750386	0.00504625	Itgb2/Hrh1/Tlr4/Ptk2b	4
Immune_reactive	GO:0031589	cell-substrate adhesion	371/20514	0.00142818	0.00772681	0.00519618	Rac2/Itgam/Itgb2/Fermt3/Itgax/Spp1/Dab2/Lpxn/Ptk2b/Ptprj/Sirpa	11
Immune_reactive	GO:0051279	regulation of release of sequestered calcium ion into cytosol	82/20514	0.00144933	0.00781453	0.00525517	P2ry6/Lyn/Ptpn6/Ptk2b/Cyba	5
Immune_reactive	GO:0070373	negative regulation of ERK1 and ERK2 cascade	82/20514	0.00144933	0.00781453	0.00525517	Ptprc/Lyn/Dab2/Tlr4/Sirpa	5
Immune_reactive	GO:0006959	humoral immune response	264/20514	0.00149492	0.0080246	0.00539644	Fcgr2b/C1qb/C1qc/C1qa/Trem2/Ptprc/Mef2c/Ptpn6/Cfh	9
Immune_reactive	GO:0002369	T cell cytokine production	49/20514	0.0014959	0.0080246	0.00539644	Slc11a1/Lilrb4b/Vsir/Tnfrsf1b	4
Immune_reactive	GO:0050856	regulation of T cell receptor signaling pathway	49/20514	0.0014959	0.0080246	0.00539644	Laptm5/Lilrb4b/Ptpn6/Ptprj	4
Immune_reactive	GO:0002244	hematopoietic progenitor cell differentiation	166/20514	0.00151076	0.0080906	0.00544082	Csf1r/Rbm47/Ptprc/Pld4/Spi1/Ptpn6/Sirpa	7
Immune_reactive	GO:0006907	pinocytosis	23/20514	0.00154518	0.00824702	0.00554601	Dock2/Pycard/Dab2	3
Immune_reactive	GO:0140632	inflammasome complex assembly	23/20514	0.00154518	0.00824702	0.00554601	Trem2/Aim2/Tlr4	3
Immune_reactive	GO:0002714	positive regulation of B cell mediated immunity	50/20514	0.00161328	0.0085385	0.00574203	Trem2/Ptprc/Fcer1g/Fcgr3	4
Immune_reactive	GO:0002891	positive regulation of immunoglobulin mediated immune response	50/20514	0.00161328	0.0085385	0.00574203	Trem2/Ptprc/Fcer1g/Fcgr3	4
Immune_reactive	GO:0046456	icosanoid biosynthetic process	50/20514	0.00161328	0.0085385	0.00574203	Syk/Ptgs1/Hpgds/Tbxas1	4
Immune_reactive	GO:1902930	regulation of alcohol biosynthetic process	50/20514	0.00161328	0.0085385	0.00574203	P2ry6/Dab2/Plek/Ptk2b	4
Immune_reactive	GO:1904407	positive regulation of nitric oxide metabolic process	50/20514	0.00161328	0.0085385	0.00574203	Itgb2/Hrh1/Tlr4/Ptk2b	4
Immune_reactive	GO:0030500	regulation of bone mineralization	85/20514	0.00170048	0.00897005	0.00603224	Ccr1/Srgn/P2rx7/Mef2c/Ptk2b	5
Immune_reactive	GO:0032729	positive regulation of interferon-gamma production	85/20514	0.00170048	0.00897005	0.00603224	Slc11a1/Tlr7/Pycard/Irf8/Tlr4	5
Immune_reactive	GO:0070997	neuron death	438/20514	0.0017127	0.00901946	0.00606547	Fcgr2b/C1qa/Itgam/Trem2/Tyrobp/Cx3cr1/Mef2c/Casp8/Lgmn/Tlr4/Ptk2b/Tnfrsf1b	12
Immune_reactive	GO:0006691	leukotriene metabolic process	24/20514	0.00175287	0.00918514	0.00617689	Syk/Ncf1/Tlr4	3
Immune_reactive	GO:0010878	cholesterol storage	24/20514	0.00175287	0.00918514	0.00617689	Trem2/Msr1/Lpl	3
Immune_reactive	GO:0035855	megakaryocyte development	24/20514	0.00175287	0.00918514	0.00617689	Fli1/Ptpn6/Sh2b3	3
Immune_reactive	GO:1904062	regulation of cation transmembrane transport	381/20514	0.00176131	0.00921412	0.00619638	Pik3cg/Ctss/Trem2/P2ry6/Lyn/Mef2c/Ptpn6/Tcirg1/Ptk2b/Gal/Cyba	11
Immune_reactive	GO:0002702	positive regulation of production of molecular mediator of immune response	126/20514	0.00177295	0.00922926	0.00620656	Laptm5/Ptprc/Fcer1g/Cd86/Tlr4/Il4ra	6
Immune_reactive	GO:0030282	bone mineralization	126/20514	0.00177295	0.00922926	0.00620656	Ccr1/Srgn/P2rx7/Spp1/Mef2c/Ptk2b	6
Immune_reactive	GO:0045807	positive regulation of endocytosis	126/20514	0.00177295	0.00922926	0.00620656	Trem2/Syk/Nckap1l/Dab2/Pld2/Ldlrap1	6
Immune_reactive	GO:0010921	regulation of phosphatase activity	86/20514	0.00179089	0.00930731	0.00625904	Cd33/Ptprc/Nckap1l/Mef2c/Plek	5
Immune_reactive	GO:0061756	leukocyte adhesion to vascular endothelial cell	52/20514	0.00186697	0.00968682	0.00651426	Itgam/Cx3cr1/Itgb2/Selplg	4
Undefined_neuron	GO:0007611	learning or memory	319/20514	2.19e-13	5.63e-10	4.55e-10	Neto1/Grin2b/Grm4/Calb1/Ntrk2/Camk2n1/Kcnab1/Dgki/Adcy8/Ptn/Adra1b/Csmd1/Nptx2/Slc8a3/Brinp1/Cntnap2/Foxp2/Shank1/Grin1/Syngap1/Nrxn2/Reln/Asic1	23
Undefined_neuron	GO:0007612	learning	186/20514	7.07e-13	9.11e-10	7.36e-10	Neto1/Grin2b/Grm4/Ntrk2/Dgki/Ptn/Adra1b/Csmd1/Nptx2/Slc8a3/Cntnap2/Foxp2/Shank1/Grin1/Syngap1/Nrxn2/Reln/Asic1	18
Undefined_neuron	GO:0050890	cognition	355/20514	2.02e-12	1.46e-09	1.18e-09	Neto1/Grin2b/Grm4/Calb1/Ntrk2/Camk2n1/Kcnab1/Dgki/Adcy8/Ptn/Adra1b/Csmd1/Nptx2/Slc8a3/Brinp1/Cntnap2/Foxp2/Shank1/Grin1/Syngap1/Nrxn2/Reln/Asic1	23
Undefined_neuron	GO:0042391	regulation of membrane potential	468/20514	2.27e-12	1.46e-09	1.18e-09	Neto1/Grin2b/Ntrk2/Trpc4/Dgki/Dpp6/Rapgef4/Ptn/Chrna3/Slc8a3/Kcnh1/Cnih2/Cntnap2/Cacng2/Tbx5/Pex5l/Tafa4/Shank1/Atp1b1/Grin1/Sez6/Nalcn/Ryr2/Cacna1d/Reln/Asic1	26
Undefined_neuron	GO:0050808	synapse organization	492/20514	4.23e-11	2.18e-08	1.76e-08	Clstn2/Frmpd4/Grin2b/Sez6l/Rph3a/Ntrk2/Sdk2/Rapgef4/Ptn/Slc8a3/Il1rapl2/Gap43/Cntnap2/Cacng2/Disc1/Cacna2d2/Lingo2/Shank1/Grin1/Syngap1/Sez6/Nrxn2/Sez6l2/Fzd1/Reln	25
Undefined_neuron	GO:0016358	dendrite development	316/20514	6.54e-10	2.81e-07	2.27e-07	Bmp7/Ntrk2/Dcx/Dscam/Rapgef4/Grin3a/Ptn/Chrna3/Hecw2/Srgap2/Cntnap2/Fat3/Disc1/Shank1/Grin1/Syngap1/Sez6/Reln/Sema3a	19
Undefined_neuron	GO:0007613	memory	161/20514	1.14e-09	4.18e-07	3.38e-07	Neto1/Grin2b/Calb1/Ntrk2/Camk2n1/Adcy8/Ptn/Csmd1/Slc8a3/Brinp1/Shank1/Grin1/Reln/Asic1	14
Undefined_neuron	GO:0099601	regulation of neurotransmitter receptor activity	69/20514	3.32e-08	8.91e-06	7.2e-06	Neto1/Rph3a/Dlgap1/Nptx2/Dlgap2/Cnih2/Cacng2/Shank1/Reln	9
Undefined_neuron	GO:0060079	excitatory postsynaptic potential	92/20514	3.39e-08	8.91e-06	7.2e-06	Neto1/Grin2b/Dgki/Chrna3/Slc8a3/Cntnap2/Shank1/Grin1/Sez6/Reln	10
Undefined_neuron	GO:0010469	regulation of signaling receptor activity	147/20514	3.66e-08	8.91e-06	7.2e-06	Neto1/Rph3a/Fam72a/Dlgap1/Nptx2/Dlgap2/Cnih2/Cacng2/Tafa4/Shank1/Reln/Zfyve28	12
Undefined_neuron	GO:0008306	associative learning	119/20514	3.8e-08	8.91e-06	7.2e-06	Neto1/Grin2b/Adra1b/Csmd1/Nptx2/Cntnap2/Shank1/Grin1/Syngap1/Reln/Asic1	11
Undefined_neuron	GO:0034765	regulation of ion transmembrane transport	499/20514	4.49e-08	9.64e-06	7.79e-06	Neto1/Kcnj6/Rph3a/Kcnab1/Dpp6/Kcnip3/Tesc/Dpp10/Kcnh1/Hecw2/Cnih2/Cacng2/Cacna2d2/Shank1/Atp1b1/Grin1/Nalcn/Ryr2/Kcnc1/Cacna1d/Reln	21
Undefined_neuron	GO:0031644	regulation of nervous system process	193/20514	9.62e-08	1.85e-05	1.5e-05	Neto1/Grin2b/Dlgap1/Rapgef4/Nptx2/Dlgap2/Slc8a3/Cnih2/Cntnap2/Tafa4/Shank1/Grin1/Reln	13
Undefined_neuron	GO:0099565	chemical synaptic transmission, postsynaptic	103/20514	1.01e-07	1.85e-05	1.5e-05	Neto1/Grin2b/Dgki/Chrna3/Slc8a3/Cntnap2/Shank1/Grin1/Sez6/Reln	10
Undefined_neuron	GO:0007409	axonogenesis	493/20514	1.73e-07	2.96e-05	2.4e-05	Etv4/Bmp7/Ntrk2/Dcx/Dscam/Vstm2l/Etv1/Plxna2/Zic2/Boc/Cdh4/Gap43/Cntnap2/Disc1/Grin1/Syngap1/Dcc/Sema6d/Reln/Sema3a	20
Undefined_neuron	GO:0007616	long-term memory	44/20514	2.87e-07	4.62e-05	3.73e-05	Calb1/Ntrk2/Camk2n1/Adcy8/Shank1/Grin1/Reln	7
Undefined_neuron	GO:0035249	synaptic transmission, glutamatergic	116/20514	3.1e-07	4.69e-05	3.8e-05	Grin2b/Grm4/Ntrk2/Dgki/Cnih2/Cacng2/Disc1/Grin1/Grid1/Reln	10
Undefined_neuron	GO:0060078	regulation of postsynaptic membrane potential	118/20514	3.64e-07	5.2e-05	4.21e-05	Neto1/Grin2b/Dgki/Chrna3/Slc8a3/Cntnap2/Shank1/Grin1/Sez6/Reln	10
Undefined_neuron	GO:1904062	regulation of cation transmembrane transport	381/20514	4.06e-07	5.51e-05	4.45e-05	Neto1/Rph3a/Kcnab1/Dpp6/Kcnip3/Tesc/Dpp10/Hecw2/Cnih2/Cacng2/Shank1/Atp1b1/Grin1/Ryr2/Kcnc1/Cacna1d/Reln	17
Undefined_neuron	GO:0007411	axon guidance	258/20514	4.4e-07	5.65e-05	4.57e-05	Etv4/Bmp7/Dscam/Vstm2l/Etv1/Plxna2/Zic2/Boc/Cdh4/Gap43/Dcc/Sema6d/Reln/Sema3a	14
Undefined_neuron	GO:0097485	neuron projection guidance	259/20514	4.61e-07	5.65e-05	4.57e-05	Etv4/Bmp7/Dscam/Vstm2l/Etv1/Plxna2/Zic2/Boc/Cdh4/Gap43/Dcc/Sema6d/Reln/Sema3a	14
Undefined_neuron	GO:0007626	locomotory behavior	263/20514	5.54e-07	6.3e-05	5.09e-05	Sez6l/Calb1/Dscam/Fign/Zic1/Adcy8/Adra1b/Dnm1/Chrna3/Cntnap2/Grin1/Sez6/Sez6l2/Reln	14
Undefined_neuron	GO:0042063	gliogenesis	346/20514	5.62e-07	6.3e-05	5.09e-05	Ntrk2/Dcx/Enpp2/Trpc4/Dll3/Ptn/Slc8a3/Bmerb1/Gap43/Srgap2/Cntnap2/Disc1/Grin1/Mmp24/Bmp2/Reln	16
Undefined_neuron	GO:0060074	synapse maturation	32/20514	7.56e-07	8.11e-05	6.56e-05	Sez6l/Disc1/Shank1/Sez6/Sez6l2/Reln	6
Undefined_neuron	GO:0050773	regulation of dendrite development	136/20514	1.35e-06	0.000136	0.00011	Bmp7/Ntrk2/Rapgef4/Ptn/Chrna3/Hecw2/Fat3/Grin1/Sez6/Reln	10
Undefined_neuron	GO:0071805	potassium ion transmembrane transport	206/20514	1.42e-06	0.000136	0.00011	Neto1/Kcnj6/Kcnab1/Kcnn3/Dpp6/Kcnip3/Dpp10/Kcnh1/Atp1b1/Nalcn/Kcnc1/Cacna1d	12
Undefined_neuron	GO:0099173	postsynapse organization	206/20514	1.42e-06	0.000136	0.00011	Frmpd4/Grin2b/Rph3a/Rapgef4/Ptn/Gap43/Cntnap2/Shank1/Grin1/Syngap1/Nrxn2/Reln	12
Undefined_neuron	GO:0051588	regulation of neurotransmitter transport	139/20514	1.65e-06	0.000152	0.000123	Grm4/Ntrk2/Dgki/Syt12/Grin3a/Rab3b/Chrna3/Kcnh1/Mctp1/Asic1	10
Undefined_neuron	GO:0071625	vocalization behavior	21/20514	1.86e-06	0.000166	0.000134	Brinp1/Cntnap2/Foxp2/Shank1/Nrxn2	5
Undefined_neuron	GO:0001505	regulation of neurotransmitter levels	254/20514	2.2e-06	0.000184	0.000148	Gad2/Grm4/Rph3a/Ntrk2/Dgki/Syt12/Grin3a/Rab3b/Chrna3/Kcnh1/Mctp1/Nrxn2/Asic1	13
Undefined_neuron	GO:0007156	homophilic cell adhesion via plasma membrane adhesion molecules	112/20514	2.21e-06	0.000184	0.000148	Clstn2/Sdk2/Dscam/Vstm2l/Cdh4/Cdh20/Fat3/Pcdh19/Cdh6	9
Undefined_neuron	GO:0051966	regulation of synaptic transmission, glutamatergic	85/20514	2.49e-06	0.000201	0.000162	Grin2b/Grm4/Ntrk2/Dgki/Cacng2/Disc1/Grin1/Reln	8
Undefined_neuron	GO:0035418	protein localization to synapse	87/20514	2.98e-06	0.000231	0.000187	Dlgap1/Rapgef4/Nptx2/Cacng2/Shank1/Grin1/Nrxn2/Reln	8
Undefined_neuron	GO:0031346	positive regulation of cell projection organization	442/20514	3.1e-06	0.000231	0.000187	Bmp7/Ntrk2/Dcx/Enpp2/Dscam/Ptn/Plxna2/Cdh4/Disc1/Lrrc7/Trim67/Grin1/Sez6/Dcc/Fzd1/Reln/Dock11	17
Undefined_neuron	GO:0007269	neurotransmitter secretion	185/20514	3.23e-06	0.000231	0.000187	Grm4/Rph3a/Ntrk2/Dgki/Syt12/Grin3a/Chrna3/Kcnh1/Mctp1/Nrxn2/Asic1	11
Undefined_neuron	GO:0099643	signal release from synapse	185/20514	3.23e-06	0.000231	0.000187	Grm4/Rph3a/Ntrk2/Dgki/Syt12/Grin3a/Chrna3/Kcnh1/Mctp1/Nrxn2/Asic1	11
Undefined_neuron	GO:1901379	regulation of potassium ion transmembrane transport	90/20514	3.85e-06	0.000268	0.000216	Neto1/Kcnab1/Dpp6/Kcnip3/Dpp10/Atp1b1/Kcnc1/Cacna1d	8
Undefined_neuron	GO:0030534	adult behavior	189/20514	3.97e-06	0.000269	0.000218	Sez6l/Zic1/Adra1b/Dnm1/Chrna3/Cntnap2/Shank1/Grin1/Sez6/Nrxn2/Sez6l2	11
Undefined_neuron	GO:0050803	regulation of synapse structure or activity	270/20514	4.29e-06	0.000284	0.000229	Clstn2/Frmpd4/Grin2b/Ntrk2/Rapgef4/Ptn/Il1rapl2/Disc1/Lingo2/Grin1/Syngap1/Fzd1/Reln	13
Undefined_neuron	GO:0046928	regulation of neurotransmitter secretion	122/20514	4.49e-06	0.000289	0.000234	Grm4/Ntrk2/Dgki/Syt12/Grin3a/Chrna3/Kcnh1/Mctp1/Asic1	9
Undefined_neuron	GO:0007416	synapse assembly	192/20514	4.62e-06	0.00029	0.000235	Clstn2/Ntrk2/Sdk2/Il1rapl2/Gap43/Cntnap2/Lingo2/Grin1/Nrxn2/Fzd1/Reln	11
Undefined_neuron	GO:0032412	regulation of ion transmembrane transporter activity	274/20514	5.04e-06	0.000309	0.00025	Neto1/Rph3a/Kcnab1/Tesc/Hecw2/Cnih2/Cacng2/Shank1/Atp1b1/Ryr2/Kcnc1/Cacna1d/Reln	13
Undefined_neuron	GO:0021801	cerebral cortex radial glia-guided migration	26/20514	5.78e-06	0.000338	0.000274	Dcx/Bmerb1/Srgap2/Disc1/Reln	5
Undefined_neuron	GO:0022030	telencephalon glial cell migration	26/20514	5.78e-06	0.000338	0.000274	Dcx/Bmerb1/Srgap2/Disc1/Reln	5
Undefined_neuron	GO:0022898	regulation of transmembrane transporter activity	284/20514	7.42e-06	0.00042	0.00034	Neto1/Rph3a/Kcnab1/Tesc/Hecw2/Cnih2/Cacng2/Shank1/Atp1b1/Ryr2/Kcnc1/Cacna1d/Reln	13
Undefined_neuron	GO:0006836	neurotransmitter transport	242/20514	7.51e-06	0.00042	0.00034	Grm4/Rph3a/Ntrk2/Dgki/Syt12/Grin3a/Rab3b/Chrna3/Kcnh1/Mctp1/Nrxn2/Asic1	12
Undefined_neuron	GO:0006813	potassium ion transport	243/20514	7.83e-06	0.000429	0.000347	Neto1/Kcnj6/Kcnab1/Kcnn3/Dpp6/Kcnip3/Dpp10/Kcnh1/Atp1b1/Nalcn/Kcnc1/Cacna1d	12
Undefined_neuron	GO:0097120	receptor localization to synapse	75/20514	1.14e-05	0.00061	0.000493	Neto1/Rapgef4/Nptx2/Cnih2/Cacng2/Lrrc7/Reln	7
Undefined_neuron	GO:0098742	cell-cell adhesion via plasma-membrane adhesion molecules	213/20514	1.24e-05	0.000639	0.000517	Clstn2/Sdk2/Dscam/Vstm2l/Cdh4/Cdh20/Fat3/Pcdh19/Mmp24/Cdh6/Bmp2	11
Undefined_neuron	GO:0032409	regulation of transporter activity	298/20514	1.24e-05	0.000639	0.000517	Neto1/Rph3a/Kcnab1/Tesc/Hecw2/Cnih2/Cacng2/Shank1/Atp1b1/Ryr2/Kcnc1/Cacna1d/Reln	13
Undefined_neuron	GO:0050807	regulation of synapse organization	262/20514	1.67e-05	0.000841	0.00068	Clstn2/Frmpd4/Grin2b/Ntrk2/Rapgef4/Ptn/Il1rapl2/Disc1/Lingo2/Grin1/Fzd1/Reln	12
Undefined_neuron	GO:0007638	mechanosensory behavior	16/20514	1.73e-05	0.000852	0.000689	Etv1/Cntnap2/Foxp2/Nrxn2	4
Undefined_neuron	GO:0050767	regulation of neurogenesis	453/20514	1.75e-05	0.000852	0.000689	Bmp7/Ntrk2/Dcx/Enpp2/Dscam/Dll3/Ptn/Plxna2/Brinp1/Cdh4/Disc1/Syngap1/Bmp2/Sema6d/Reln/Sema3a	16
Undefined_neuron	GO:0043266	regulation of potassium ion transport	112/20514	1.95e-05	0.000929	0.000752	Neto1/Kcnab1/Dpp6/Kcnip3/Dpp10/Atp1b1/Kcnc1/Cacna1d	8
Undefined_neuron	GO:0050770	regulation of axonogenesis	185/20514	2.09e-05	0.000978	0.000791	Ntrk2/Dcx/Dscam/Plxna2/Cdh4/Disc1/Grin1/Syngap1/Sema6d/Sema3a	10
Undefined_neuron	GO:0048813	dendrite morphogenesis	186/20514	2.19e-05	0.00100028	0.000809	Dcx/Dscam/Ptn/Chrna3/Hecw2/Cntnap2/Shank1/Grin1/Reln/Sema3a	10
Undefined_neuron	GO:0048167	regulation of synaptic plasticity	362/20514	2.21e-05	0.00100028	0.000809	Neto1/Grin2b/Calb1/Ntrk2/Dgki/Syt12/Adcy8/Vgf/Ptn/Sorcs2/Slc8a3/Grin1/Syngap1/Reln	14
Undefined_neuron	GO:0035176	social behavior	60/20514	3.3e-05	0.00143821	0.00116291	Brinp1/Cntnap2/Shank1/Grin1/Grid1/Nrxn2	6
Undefined_neuron	GO:0098815	modulation of excitatory postsynaptic potential	60/20514	3.3e-05	0.00143821	0.00116291	Neto1/Grin2b/Slc8a3/Shank1/Grin1/Reln	6
Undefined_neuron	GO:1902414	protein localization to cell junction	121/20514	3.41e-05	0.00146391	0.0011837	Dlgap1/Rapgef4/Nptx2/Cacng2/Shank1/Grin1/Nrxn2/Reln	8
Undefined_neuron	GO:0001964	startle response	37/20514	3.5e-05	0.00147665	0.001194	Grin2b/Grin3a/Csmd1/Kcnh1/Grin1	5
Undefined_neuron	GO:0008016	regulation of heart contraction	197/20514	3.58e-05	0.00148637	0.00120186	Stc1/Chga/Adra1b/Hopx/Tbx5/Cacna2d2/Atp1b1/Ryr2/Cacna1d/Sema3a	10
Undefined_neuron	GO:0021799	cerebral cortex radially oriented cell migration	38/20514	3.99e-05	0.00163285	0.0013203	Dcx/Bmerb1/Srgap2/Disc1/Reln	5
Undefined_neuron	GO:0051703	biological process involved in intraspecies interaction between organisms	63/20514	4.36e-05	0.00175435	0.00141854	Brinp1/Cntnap2/Shank1/Grin1/Grid1/Nrxn2	6
Undefined_neuron	GO:0021680	cerebellar Purkinje cell layer development	39/20514	4.54e-05	0.0018004	0.00145578	Sez6l/Cntnap2/Foxp2/Sez6/Sez6l2	5
Undefined_neuron	GO:0034329	cell junction assembly	439/20514	4.71e-05	0.00183021	0.00147988	Clstn2/Ntrk2/Sdk2/Enpp2/Il1rapl2/Gap43/Cdh20/Cntnap2/Tbx5/Lingo2/Grin1/Cdh6/Nrxn2/Fzd1/Reln	15
Undefined_neuron	GO:0008347	glial cell migration	64/20514	4.77e-05	0.00183021	0.00147988	Dcx/Bmerb1/Srgap2/Disc1/Grin1/Reln	6
Undefined_neuron	GO:0006816	calcium ion transport	440/20514	4.83e-05	0.00183021	0.00147988	Stc1/Grin2b/Trpc4/Grin3a/Slc8a3/Cacng2/Myb/Cacna2d2/Atp1b1/Grin1/Nalcn/Ryr3/Ryr2/Cacna1d/Asic1	15
Undefined_neuron	GO:0098962	regulation of postsynaptic neurotransmitter receptor activity	21/20514	5.47e-05	0.00204096	0.00165029	Dlgap1/Nptx2/Dlgap2/Cnih2	4
Undefined_neuron	GO:0051968	positive regulation of synaptic transmission, glutamatergic	41/20514	5.82e-05	0.00211018	0.00170626	Grin2b/Ntrk2/Cacng2/Grin1/Reln	5
Undefined_neuron	GO:2000463	positive regulation of excitatory postsynaptic potential	41/20514	5.82e-05	0.00211018	0.00170626	Neto1/Grin2b/Shank1/Grin1/Reln	5
Undefined_neuron	GO:0030900	forebrain development	397/20514	6.04e-05	0.00215942	0.00174607	Otx1/Mecom/Ntrk2/Dcx/Zic5/Bmerb1/Srgap2/Cntnap2/Disc1/Foxp2/Grin1/Bmp2/Reln/Sema3a	14
Undefined_neuron	GO:0010001	glial cell differentiation	255/20514	6.46e-05	0.00227959	0.00184324	Ntrk2/Enpp2/Trpc4/Dll3/Ptn/Slc8a3/Gap43/Cntnap2/Mmp24/Bmp2/Reln	11
Undefined_neuron	GO:0051962	positive regulation of nervous system development	357/20514	8.04e-05	0.00279879	0.00226306	Clstn2/Ntrk2/Dcx/Enpp2/Dscam/Dll3/Ptn/Plxna2/Cdh4/Disc1/Lingo2/Bmp2/Reln	13
Undefined_neuron	GO:0099084	postsynaptic specialization organization	44/20514	8.23e-05	0.00282263	0.00228234	Gap43/Cntnap2/Syngap1/Nrxn2/Reln	5
Undefined_neuron	GO:0030902	hindbrain development	176/20514	8.33e-05	0.00282263	0.00228234	Otx1/Bmp7/Sez6l/Plxna2/Cntnap2/Foxp2/Grin1/Sez6/Sez6l2	9
Undefined_neuron	GO:0051271	negative regulation of cellular component movement	311/20514	8.79e-05	0.00294013	0.00237735	Angpt2/Stc1/Ptn/Bmerb1/Cnih2/Mctp1/Srgap2/Jag1/Tbx5/Ptpru/Sema6d/Sema3a	12
Undefined_neuron	GO:1903522	regulation of blood circulation	266/20514	9.42e-05	0.00310926	0.0025141	Stc1/Dock5/Chga/Adra1b/Hopx/Tbx5/Cacna2d2/Atp1b1/Ryr2/Cacna1d/Sema3a	11
Undefined_neuron	GO:0090596	sensory organ morphogenesis	318/20514	0.000108	0.00347347	0.00280859	Otx1/Bmp7/Calb1/Ntrk2/Sdk2/Eya1/Dscam/Ptn/Jag1/Fat3/Mfap2/Prrx1	12
Undefined_neuron	GO:0010976	positive regulation of neuron projection development	225/20514	0.000109	0.00347347	0.00280859	Bmp7/Ntrk2/Ptn/Disc1/Lrrc7/Trim67/Sez6/Dcc/Fzd1/Reln	10
Undefined_neuron	GO:0001654	eye development	420/20514	0.00011	0.00347347	0.00280859	Bmp7/Calb1/Ntrk2/Sdk2/Dcx/Dscam/Ptn/Rhoj/Jag1/Fat3/Mfap2/Mab21l2/Foxp2/Smoc1	14
Undefined_neuron	GO:0010996	response to auditory stimulus	25/20514	0.000112	0.00347347	0.00280859	Ptn/Cntnap2/Foxp2/Nrxn2	4
Undefined_neuron	GO:2000311	regulation of AMPA receptor activity	25/20514	0.000112	0.00347347	0.00280859	Cnih2/Cacng2/Shank1/Reln	4
Undefined_neuron	GO:0007215	glutamate receptor signaling pathway	47/20514	0.000113	0.00347437	0.00280933	Grin2b/Grm4/Grin3a/Necab2/Grin1	5
Undefined_neuron	GO:0150063	visual system development	423/20514	0.000118	0.00355303	0.00287292	Bmp7/Calb1/Ntrk2/Sdk2/Dcx/Dscam/Ptn/Rhoj/Jag1/Fat3/Mfap2/Mab21l2/Foxp2/Smoc1	14
Undefined_neuron	GO:0098598	learned vocalization behavior or vocal learning	10/20514	0.000119	0.00355303	0.00287292	Cntnap2/Foxp2/Nrxn2	3
Undefined_neuron	GO:0048592	eye morphogenesis	185/20514	0.000122	0.00360763	0.00291707	Bmp7/Calb1/Ntrk2/Sdk2/Dscam/Ptn/Jag1/Fat3/Mfap2	9
Undefined_neuron	GO:0048880	sensory system development	427/20514	0.00013	0.00381353	0.00308356	Bmp7/Calb1/Ntrk2/Sdk2/Dcx/Dscam/Ptn/Rhoj/Jag1/Fat3/Mfap2/Mab21l2/Foxp2/Smoc1	14
Undefined_neuron	GO:0001508	action potential	147/20514	0.000135	0.00382552	0.00309326	Grin2b/Ntrk2/Trpc4/Dpp6/Rapgef4/Cntnap2/Ryr2/Cacna1d	8
Undefined_neuron	GO:0006029	proteoglycan metabolic process	77/20514	0.000135	0.00382552	0.00309326	Chst8/Ndst4/Ndst3/Spock3/Xylt1/Bmp2	6
Undefined_neuron	GO:0043113	receptor clustering	77/20514	0.000135	0.00382552	0.00309326	Grin2b/Ptn/Lrrc7/Syngap1/Nrxn2/Reln	6
Undefined_neuron	GO:0043270	positive regulation of ion transport	328/20514	0.000145	0.00405473	0.00327859	Stc1/Grin2b/Dpp6/Tesc/Rab3b/Cacng2/Atp1b1/Grin1/Ryr2/Kcnc1/Cacna1d/Reln	12
Undefined_neuron	GO:0021987	cerebral cortex development	112/20514	0.000151	0.00418547	0.00338431	Ntrk2/Dcx/Bmerb1/Srgap2/Disc1/Grin1/Reln	7
Undefined_neuron	GO:0009100	glycoprotein metabolic process	331/20514	0.000158	0.00431868	0.00349202	Galntl6/Chst8/B3gnt5/Ndst4/Ndst3/Itm2a/Spock3/Necab2/Mgat5b/Xylt1/Galnt16/Bmp2	12
Undefined_neuron	GO:0008038	neuron recognition	51/20514	0.000168	0.00455187	0.00368057	Dscam/Vstm2l/Gap43/Cntnap2/Sema3a	5
Undefined_neuron	GO:0060047	heart contraction	238/20514	0.000172	0.00461887	0.00373475	Stc1/Chga/Adra1b/Hopx/Tbx5/Cacna2d2/Atp1b1/Ryr2/Cacna1d/Sema3a	10
Undefined_neuron	GO:0060039	pericardium development	28/20514	0.000177	0.00469692	0.00379786	Bmp7/Mecom/Tbx5/Bmp2	4
Undefined_neuron	GO:0060042	retina morphogenesis in camera-type eye	81/20514	0.000179	0.00470123	0.00380134	Calb1/Ntrk2/Sdk2/Dscam/Ptn/Fat3	6
Undefined_neuron	GO:0048593	camera-type eye morphogenesis	154/20514	0.000186	0.00483205	0.00390712	Bmp7/Calb1/Ntrk2/Sdk2/Dscam/Ptn/Jag1/Fat3	8
Undefined_neuron	GO:0050905	neuromuscular process	196/20514	0.000188	0.00484973	0.00392142	Grin2b/Tmem150c/Grin3a/Csmd1/Slc8a3/Kcnh1/Cntnap2/Shank1/Grin1	9
Undefined_neuron	GO:0030336	negative regulation of cell migration	289/20514	0.000195	0.00496415	0.00401394	Angpt2/Stc1/Ptn/Bmerb1/Mctp1/Srgap2/Jag1/Tbx5/Ptpru/Sema6d/Sema3a	11
Undefined_neuron	GO:0006874	cellular calcium ion homeostasis	500/20514	0.000198	0.00500791	0.00404932	Stc1/Grin2b/Calb1/Trpc4/Chga/Adcy8/Adra1b/Slc8a3/Kcnh1/Disc1/Atp1b1/Grin1/Ryr3/Ryr2/Cacna1d	15
Undefined_neuron	GO:0021795	cerebral cortex cell migration	53/20514	0.000202	0.00504494	0.00407926	Dcx/Bmerb1/Srgap2/Disc1/Reln	5
Undefined_neuron	GO:0010959	regulation of metal ion transport	446/20514	0.000204	0.00505955	0.00409107	Neto1/Stc1/Trpc4/Kcnab1/Dpp6/Kcnip3/Tesc/Dpp10/Hecw2/Atp1b1/Grin1/Ryr2/Kcnc1/Cacna1d	14
Undefined_neuron	GO:0035637	multicellular organismal signaling	157/20514	0.000212	0.00514973	0.00416399	Ntrk2/Dpp6/Rapgef4/Cntnap2/Cacng2/Tbx5/Ryr2/Cacna1d	8
Undefined_neuron	GO:0072006	nephron development	157/20514	0.000212	0.00514973	0.00416399	Adamts16/Angpt2/Bmp7/Fgf1/Calb1/Eya1/Jag1/Bmp2	8
Undefined_neuron	GO:0050769	positive regulation of neurogenesis	296/20514	0.000239	0.00575871	0.00465641	Ntrk2/Dcx/Enpp2/Dscam/Dll3/Ptn/Plxna2/Cdh4/Disc1/Bmp2/Reln	11
Undefined_neuron	GO:0003015	heart process	250/20514	0.000256	0.00610024	0.00493256	Stc1/Chga/Adra1b/Hopx/Tbx5/Cacna2d2/Atp1b1/Ryr2/Cacna1d/Sema3a	10
Undefined_neuron	GO:0050805	negative regulation of synaptic transmission	87/20514	0.000265	0.00625275	0.00505588	Dgki/Rapgef4/Adcy8/Sorcs2/Cntnap2/Asic1	6
Undefined_neuron	GO:0070588	calcium ion transmembrane transport	300/20514	0.000268	0.00625775	0.00505992	Grin2b/Trpc4/Slc8a3/Cacng2/Atp1b1/Grin1/Nalcn/Ryr3/Ryr2/Cacna1d/Asic1	11
Undefined_neuron	GO:0022037	metencephalon development	123/20514	0.00027	0.00625775	0.00505992	Otx1/Sez6l/Cntnap2/Foxp2/Grin1/Sez6/Sez6l2	7
Undefined_neuron	GO:0031223	auditory behavior	13/20514	0.000276	0.00627472	0.00507364	Cntnap2/Foxp2/Nrxn2	3
Undefined_neuron	GO:0140059	dendrite arborization	13/20514	0.000276	0.00627472	0.00507364	Ptn/Cntnap2/Sema3a	3
Undefined_neuron	GO:0006942	regulation of striated muscle contraction	88/20514	0.000282	0.00627472	0.00507364	Stc1/Chga/Adra1b/Slc8a3/Atp1b1/Ryr2	6
Undefined_neuron	GO:2000146	negative regulation of cell motility	302/20514	0.000284	0.00627472	0.00507364	Angpt2/Stc1/Ptn/Bmerb1/Mctp1/Srgap2/Jag1/Tbx5/Ptpru/Sema6d/Sema3a	11
Undefined_neuron	GO:0010463	mesenchymal cell proliferation	57/20514	0.000285	0.00627472	0.00507364	Bmp7/Ptn/Foxp2/Prrx1/Bmp2	5
Undefined_neuron	GO:0006937	regulation of muscle contraction	164/20514	0.000285	0.00627472	0.00507364	Stc1/Dock5/Chga/Adra1b/Chrna3/Slc8a3/Atp1b1/Ryr2	8
Undefined_neuron	GO:0021537	telencephalon development	257/20514	0.000319	0.00695589	0.00562443	Ntrk2/Dcx/Bmerb1/Srgap2/Disc1/Foxp2/Grin1/Bmp2/Reln/Sema3a	10
Undefined_neuron	GO:0007528	neuromuscular junction development	59/20514	0.000335	0.00725064	0.00586276	Ntrk2/Ptn/Cntnap2/Cacng2/Cacna2d2	5
Undefined_neuron	GO:0010812	negative regulation of cell-substrate adhesion	60/20514	0.000363	0.00772725	0.00624814	Angpt2/Enpp2/Spry4/Jag1/Ajap1	5
Undefined_neuron	GO:1904064	positive regulation of cation transmembrane transport	170/20514	0.000363	0.00772725	0.00624814	Dpp6/Tesc/Cacng2/Atp1b1/Ryr2/Kcnc1/Cacna1d/Reln	8
Undefined_neuron	GO:1990778	protein localization to cell periphery	369/20514	0.000424	0.00887981	0.00718008	Dpp6/Kcnip3/Rapgef4/Gpr158/Tesc/Dpp10/Nptx2/Rab3b/Cacng2/Atp1b1/Grin1/Efr3b	12
Undefined_neuron	GO:0006941	striated muscle contraction	174/20514	0.000424	0.00887981	0.00718008	Stc1/Chga/Adra1b/Slc8a3/Atp1b1/Ryr3/Ryr2/Cacna1d	8
Undefined_neuron	GO:0021819	layer formation in cerebral cortex	15/20514	0.000433	0.00899823	0.00727583	Dcx/Bmerb1/Reln	3
Undefined_neuron	GO:1901888	regulation of cell junction assembly	220/20514	0.000441	0.00908774	0.00734821	Clstn2/Ntrk2/Enpp2/Il1rapl2/Cntnap2/Tbx5/Lingo2/Grin1/Fzd1	9
Undefined_neuron	GO:0050806	positive regulation of synaptic transmission	319/20514	0.000451	0.00922175	0.00745657	Clstn2/Grin2b/Calb1/Ntrk2/Syt12/Adcy8/Ptn/Slc8a3/Cacng2/Grin1/Reln	11
Undefined_neuron	GO:0043010	camera-type eye development	373/20514	0.000467	0.00946066	0.00764974	Bmp7/Calb1/Ntrk2/Sdk2/Dcx/Dscam/Ptn/Rhoj/Jag1/Fat3/Mab21l2/Foxp2	12
Undefined_neuron	GO:0048169	regulation of long-term neuronal synaptic plasticity	36/20514	0.000478	0.00960825	0.00776909	Neto1/Grin2b/Grin1/Syngap1	4
Undefined_neuron	GO:0009101	glycoprotein biosynthetic process	271/20514	0.000484	0.0096553	0.00780713	Galntl6/Chst8/B3gnt5/Ndst4/Ndst3/Itm2a/Necab2/Mgat5b/Xylt1/Galnt16	10
Undefined_neuron	GO:1901016	regulation of potassium ion transmembrane transporter activity	64/20514	0.00049	0.00970078	0.0078439	Neto1/Kcnab1/Atp1b1/Kcnc1/Cacna1d	5
Undefined_neuron	GO:0010720	positive regulation of cell development	376/20514	0.000501	0.00984731	0.00796238	Ntrk2/Dcx/Enpp2/Dscam/Dock5/Dll3/Ptn/Plxna2/Cdh4/Disc1/Bmp2/Reln	12
Undefined_neuron	GO:0009612	response to mechanical stimulus	179/20514	0.000512	0.00998701	0.00807534	Grin2b/Tmem150c/Ptn/Etv1/Cntnap2/Foxp2/Nrxn2/Ryr2	8
Unknown	GO:0034765	regulation of ion transmembrane transport	499/20514	5.44e-06	0.00612917	0.00555799	Scn9a/Kcnc2/Scn5a/Kcnq3/Scn3b/Dysf/Ramp3/Kcnd2/Kcnj10/Tesc	10
Unknown	GO:0001508	action potential	147/20514	9.28e-06	0.00612917	0.00555799	Scn9a/Kcnc2/Scn5a/Scn3b/Dsc2/Kcnd2	6
